# Supplementary material for: A robust heterogeneous chiral phosphoric acid enables multi decagram scale production of optically active N,S-ketals
Source: Royal Society of Chemistry journal article supplement (doi:10.1039/d4gc00019f), 2024-01-01
Supplement: d4gc00019f1.pdf [file d4gc00019f1.pdf]

# A Robust Heterogeneous Chiral Phosphoric Acid Enables Multi Decagram Scale Production of Optically Active N,S-Ketals

Aitor Maestro<sup>\*a,b</sup> Bhanwar K. Malviya,<sup>b,c</sup> Gerald Auer,<sup>d</sup> Sándor B. Ötvös,<sup>b,c</sup> C. Oliver Kappe<sup>\*b,c</sup>

<sup>a</sup> Department of Organic Chemistry I, University of the Basque Country, UPV/EHU, Paseo de la Universidad 7, 01006 Vitoria-Gasteiz, Spain; <sup>b</sup> Institute of Chemistry, University of Graz, NAWI Graz, A-8010 Graz, Austria; <sup>c</sup> Center for Continuous Flow Synthesis and Processing (CC FLOW), Research Center Pharmaceutical Engineering GmbH (RCPE), A-8010 Graz, Austria; <sup>d</sup> Department of Earth Sciences, University of Graz, NAWI Graz Geocenter, A-8010 Graz, Austria.

|                                                                         |    |
|-------------------------------------------------------------------------|----|
| General Experimental Information.....                                   | 2  |
| Reactor design.....                                                     | 4  |
| Synthesis and characterization of PS-TRIP catalyst.....                 | 6  |
| General procedures for the batch synthesis of <b>3</b> .....            | 16 |
| Reaction optimization in batch.....                                     | 17 |
| Reaction optimization in flow.....                                      | 18 |
| Procedure for filling the packed-bed reactor.....                       | 19 |
| General procedure for the synthesis of <b>3</b> in continuous flow..... | 19 |
| Green metrics, TRIP vs PS-TRIP comparison.....                          | 21 |
| Experimental residence time and steady state.....                       | 22 |
| Characterization data of <b>3</b> .....                                 | 24 |
| Chiral HPLC chromatograms of <b>3</b> .....                             | 28 |
| NMR spectra of <b>3</b> .....                                           | 38 |
| References.....                                                         | 50 |

## General Experimental Information

All solvents and chemicals were obtained from typical commercial vendors and were used as received, without any further purification.

When required, column chromatographic purification was performed by using a Biotage Isolera automated flash chromatography system with cartridges packed with KP-SIL, 60 Å (32–63 µm particle size). Analytical thin-layer chromatography (TLC) was carried out using Merck silica gel 60 GF254 plates. Compounds were visualized by means of UV or by using KMnO<sub>4</sub>.

<sup>1</sup>H, <sup>19</sup>F and <sup>13</sup>C-NMR spectra were recorded on a Bruker Avance III 300 MHz instrument at room temperature, in CDCl<sub>3</sub> as solvent, at 300 MHz and 75 MHz, respectively. Chemical shifts (δ) are reported in ppm relative to the residual solvent peak (CDCl<sub>3</sub>, <sup>1</sup>H: 7.26 ppm; <sup>13</sup>C: 77.16 ppm). Coupling constants are reported in Hertz. Multiplicity is reported with the usual abbreviations.

Analytical HPLC analysis was carried out on a C18 reversed-phase (RP) analytical column (150 × 4.6 mm, particle size 5 µm) at 37 °C by using mobile phases A [water/acetonitrile 90:10 (v/v) + 0.1% TFA] and B (acetonitrile + 0.1% TFA) at a flow rate of 1.5 mL/min. The following gradient was applied: Linear increase from 3% solution B to 5% B over 3 min, linear increase from 5% B to 30% B over 4 min, linear increase from 30% B to 100% B over 3 min, hold at 100% B for 2 min, linear decrease from 100% B to 3% B over 0.5 min, hold at 3% B for 2.5 min.

Chiral HPLC analysis was performed on a Shimadzu HPLC system (DGU-403 degassing unit, CTO-40S column oven, CBM20 system controller, SPD-40 UV-VIS detector, LC-20AT pumps).

Optical rotation was measured in CHCl<sub>3</sub> (HPLC-grade) at 25 °C against the sodium D-line (λ = 589 nm) on a Perkin Elmer Polarimeter 341 using a 10-cm pathlength cell. The specific rotation was calculated with the following equation, where T is the temperature in °C, D is the sodium D-line emission, α is the angle of rotation, c is the concentration of the solution in g per 100 mL and d is the length of the polarimeter tube in dm (here 1 dm). The given data was calculated as the average of three measurements.

$$[\alpha]_D^T = \frac{100 \times \alpha}{c \times d}$$

The absolute configuration was determined by comparison of the optical rotation for compound **3a**, and the absolute configurations of other compounds were assigned by analogy.<sup>S1</sup>

High-resolution mass spectra were recorded in either negative or positive mode on an Agilent 6230 TOF LC/MS (G6230B) by flow injections on an Agilent 1260 Infinity Series HPLC (HiP Degasser G4225A, Binary Pump G1312B, ALS Autosampler G1329B, TCC Column thermostat G1316A, DAD Detector G4212B).

Equipment for the continuous flow reactions was assembled using commercially available components. Liquid streams were pumped by using Syrris® Asia syringe pumps. Reaction coils were heated by means of a conventional oil bath. Reagent feeds were either streamed directly or by using injection valves and sample loops. Sample loops and reactor coils were made by using perfluoroalkoxy alkane (PFA) tubings (1/16" OD, 0.80 mm ID or 1/8" OD, 1.58 mm ID). Details of reaction setups as well as general procedures can be found in the following sections.

Infrared spectra (IR) were taken in a Bruker Alpha spectrometer with an ATR unit.

**PS-TRIP** samples were imaged on a Zeiss Gemini DSM982 field-emission scanning electron microscope at the University of Graz, Department of Earth Sciences, NAWI Graz Geocenter.

For SEM imaging, aliquots of **PS-TRIP** were transferred to an standard aluminium SEM stub using conductive graphite tape and coated with C/Pt (0.5 nm and 3 nm, respectively) using a Leica EM ACE600 Sputtercoater. Samples were imaged using combined external and in-lens secondary electron (SE) detectors. The detector signals were dynamically combined to increase structural resolution using the DISS5 SEM software (point electronic GmbH).

Elemental analysis was performed using a EDWIN energy-dispersive X-ray spectroscope (EDS; RÖNTEC GmbH), using 10kV acceleration voltage. Peak identification was performed using the RÖNTEC WinShell und WinTool software (RÖNTEC GmbH).

## Reactor design

The design was performed with Autodesk Fusion-360. All the units are shown in mm. All the parts were cut from PTFE pieces. 1.5 mm OD / 0.8 mm ID tubes were connected into the bottom part with cyanoacrylate glue. Once the catalyst was filled into the packed bed reactor, it was covered with glass wool to prevent the catalyst beads to clog the outlet.

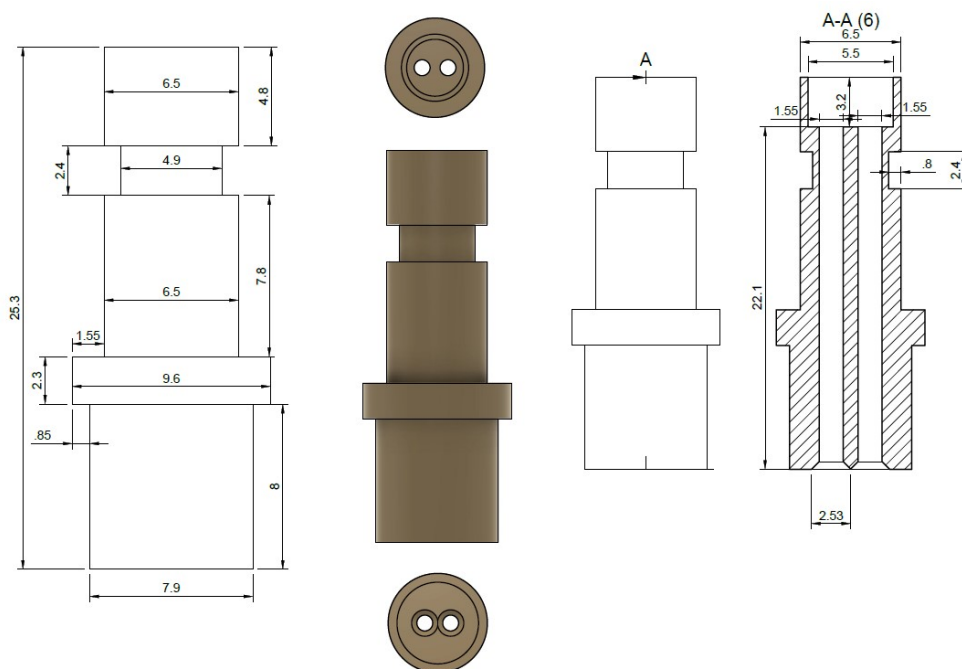

Figure S1. Bottom connector.

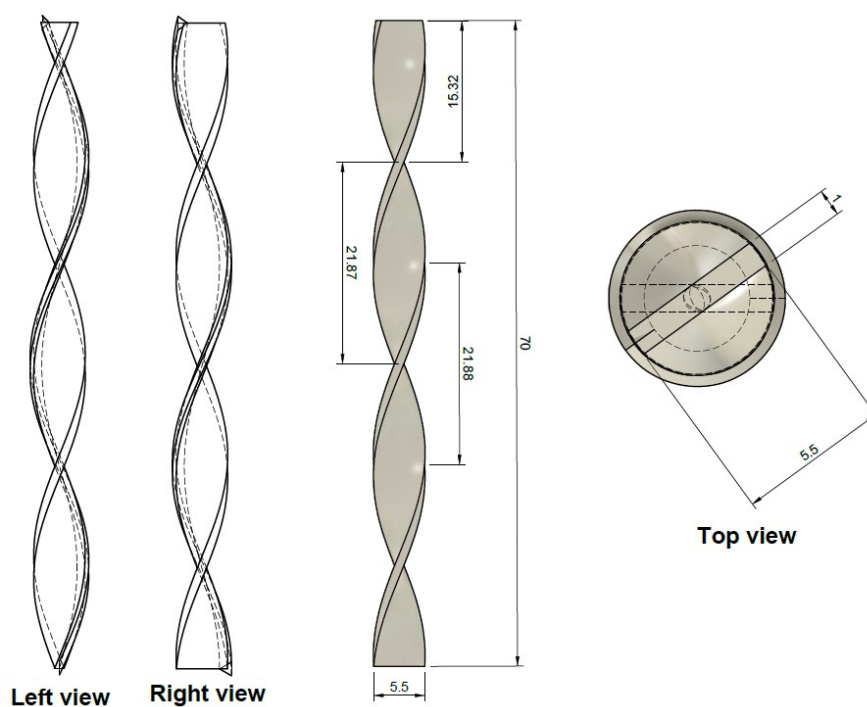

Figure S2. Spiral mixer.

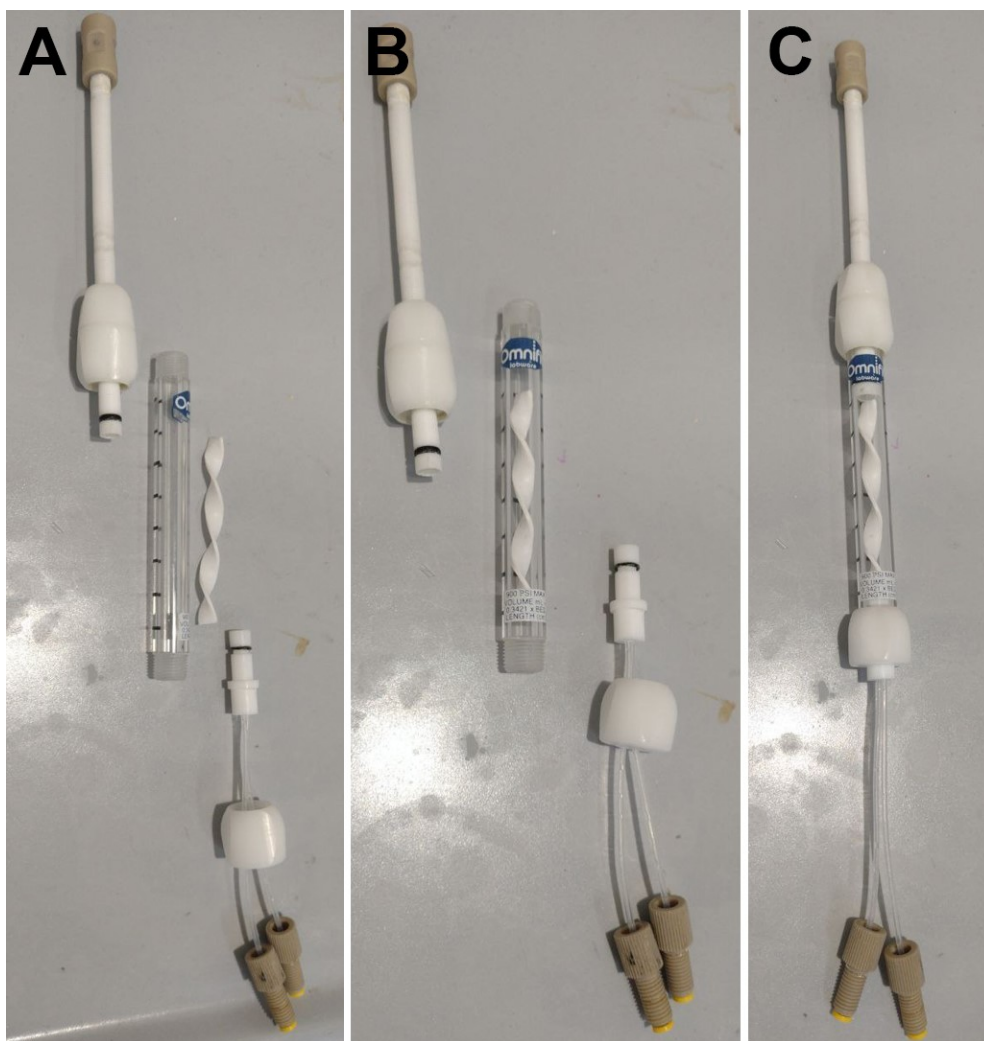

**Figure S3.** Reactor assembly: **A)** Fully disassembled. **B)** Mixer inside the glass column. **C)** Fully assembled.

## Synthesis and characterization of PS-TRIP catalyst

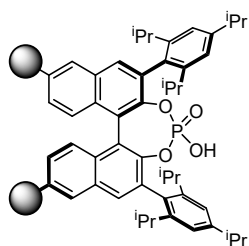

The synthesis of **PS-TRIP** catalysts was performed following Pericàs's procedure.<sup>S2, S3</sup>

The catalyst loading of the resin was calculated based on the P elemental analysis by using the following formula:

$$f\left(\frac{\text{mmol}}{\text{g}}\right) = \frac{\%P \times 1000}{\text{number of P atoms} \times MW(P) \times 100}$$

**Elem. Anal. P:** 0.48%.

**f** = 0.15 mmol/g

IR

As prepared catalyst

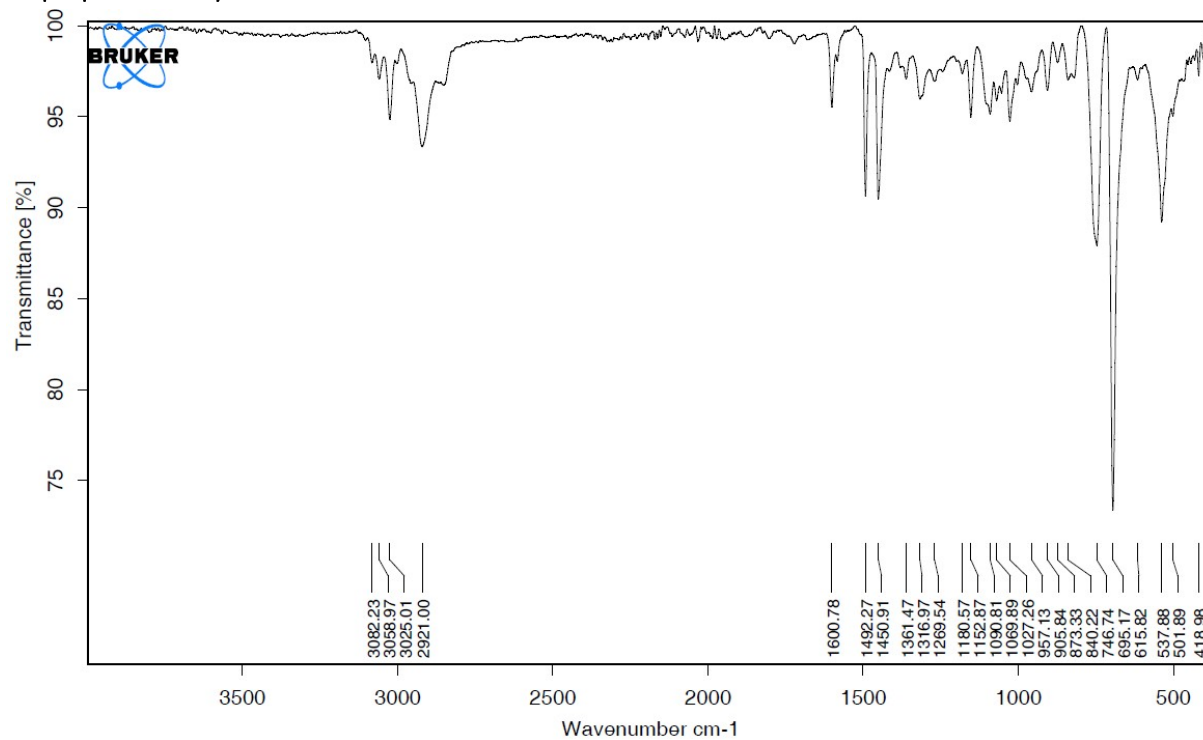

Used catalyst

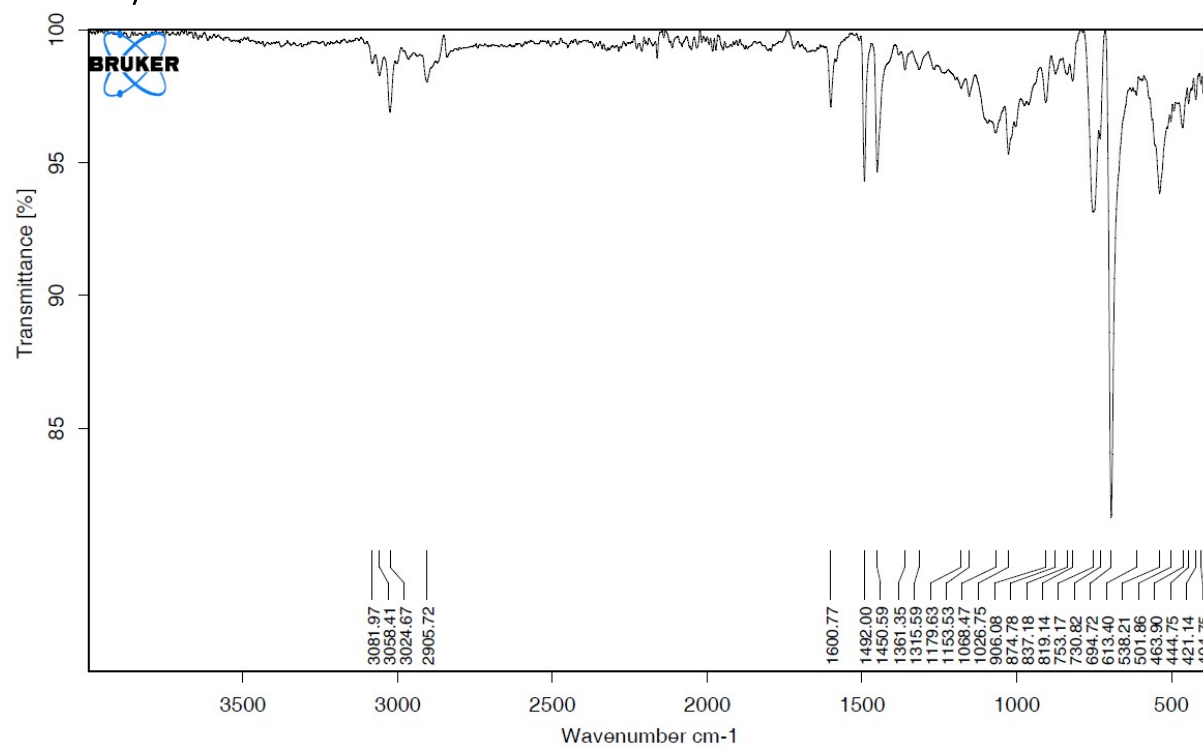

Figure S4. IR of as prepared and used PS-TRIP catalyst.

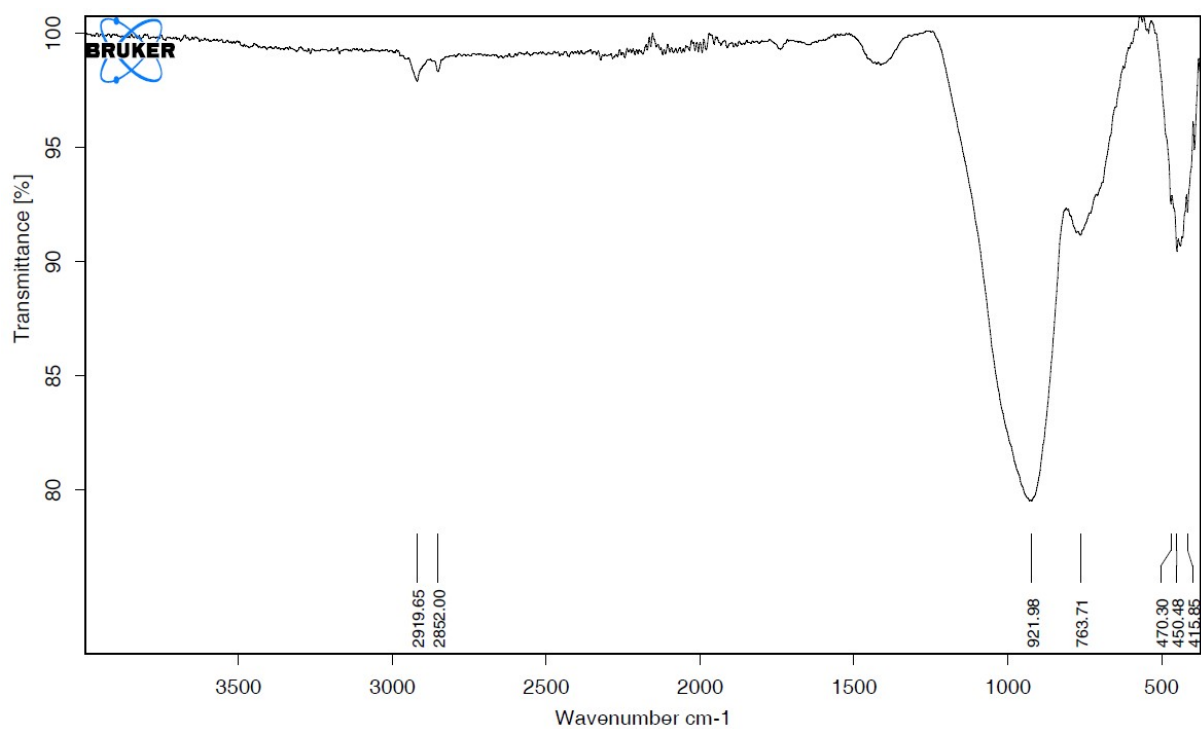

*Figure S5. Reference IR of the glass wool.*

Optical microscopy  
As prepared catalyst

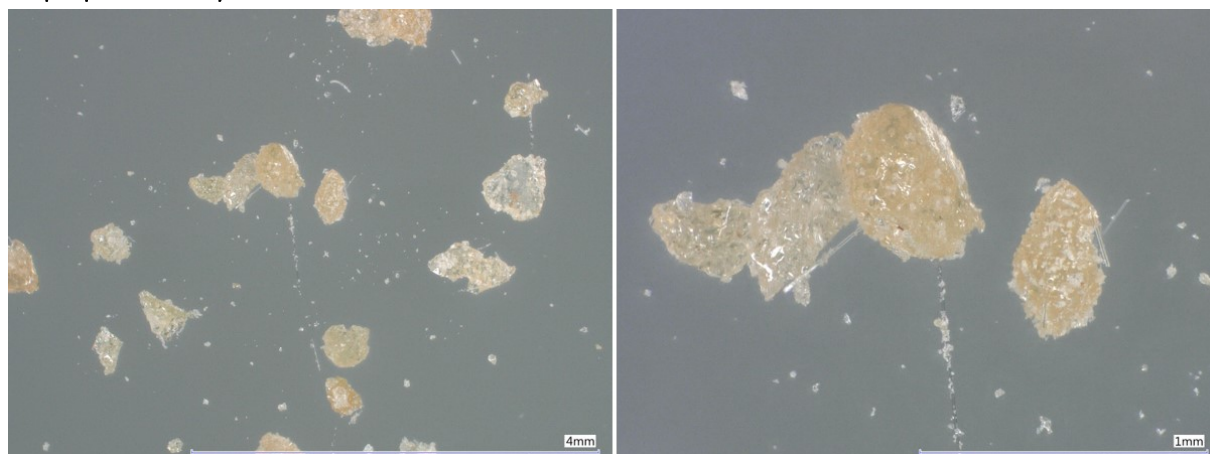

Used catalyst

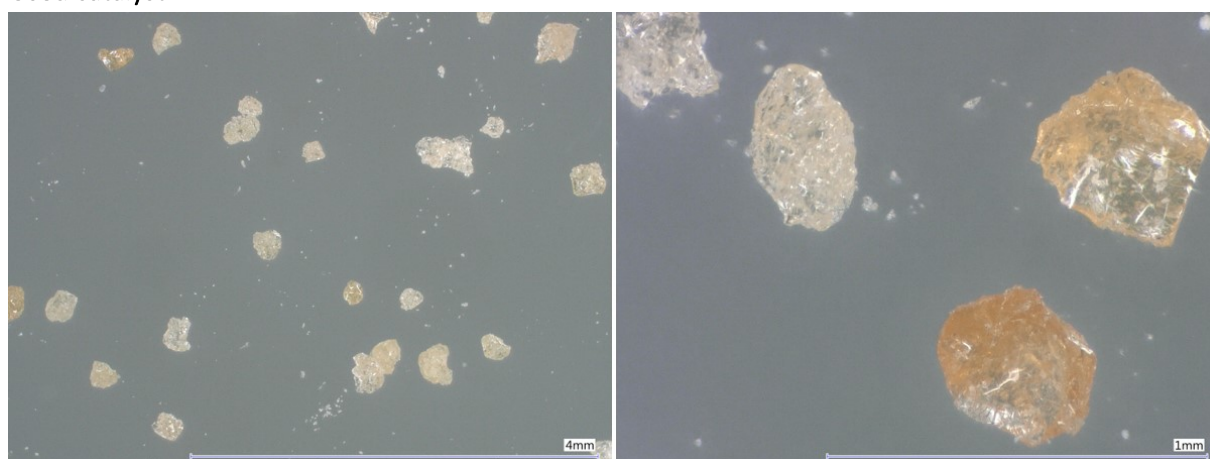

*Figure S6. Optical microscopy of as prepared and used PS-TRIP catalyst.*

SEM

As prepared catalyst

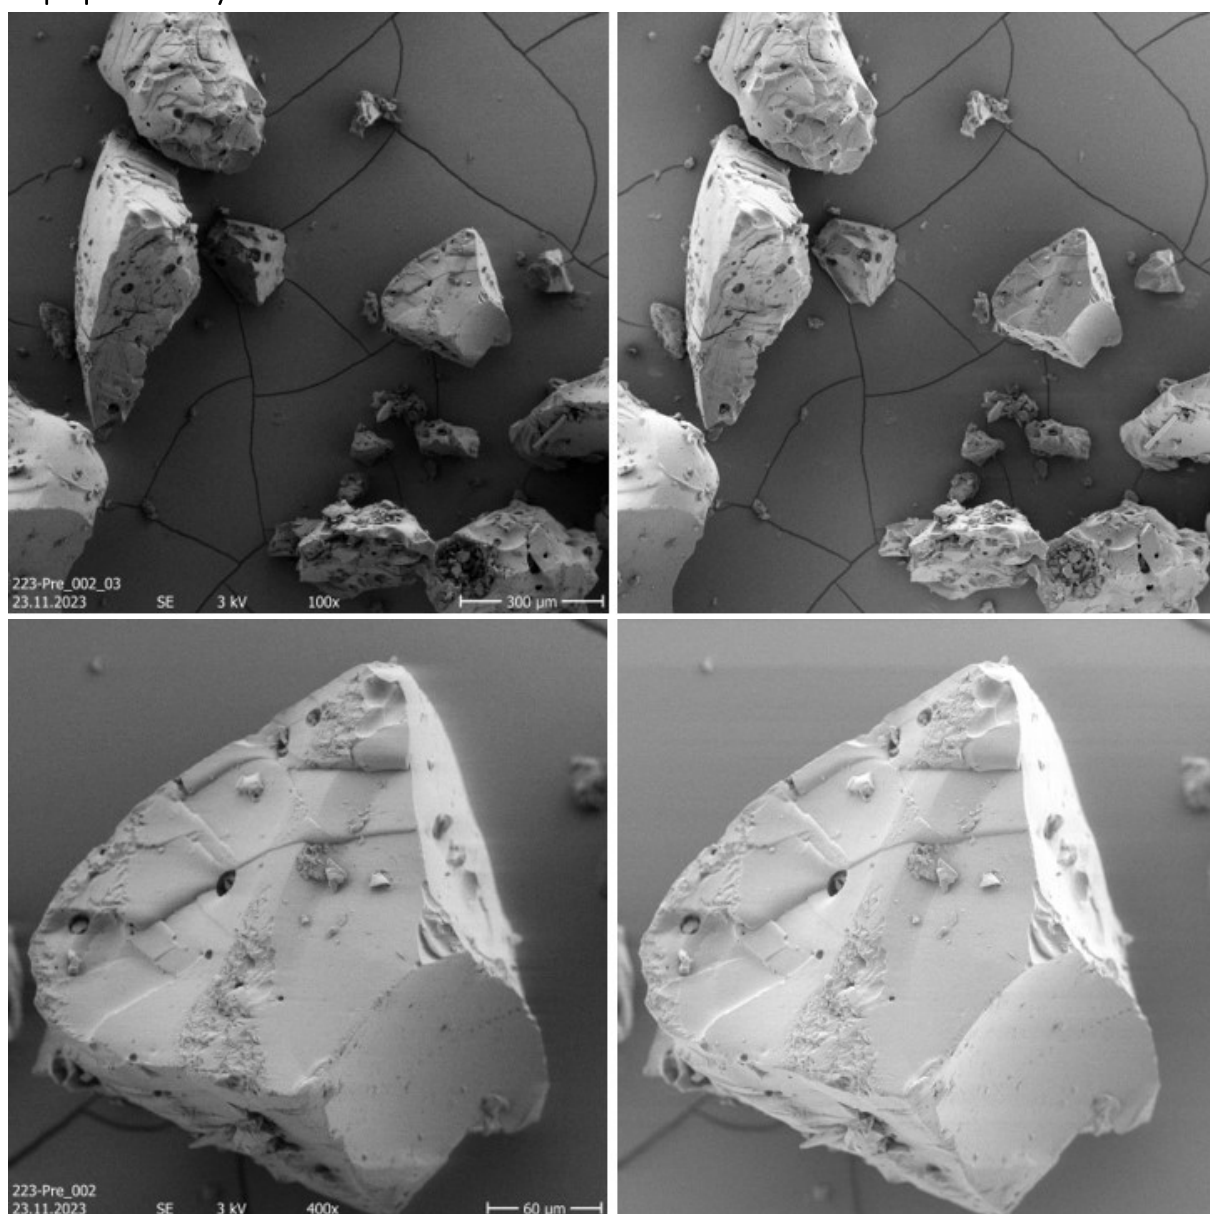

*Figure S7.1 SEM of as prepared PS-TRIP catalyst.*

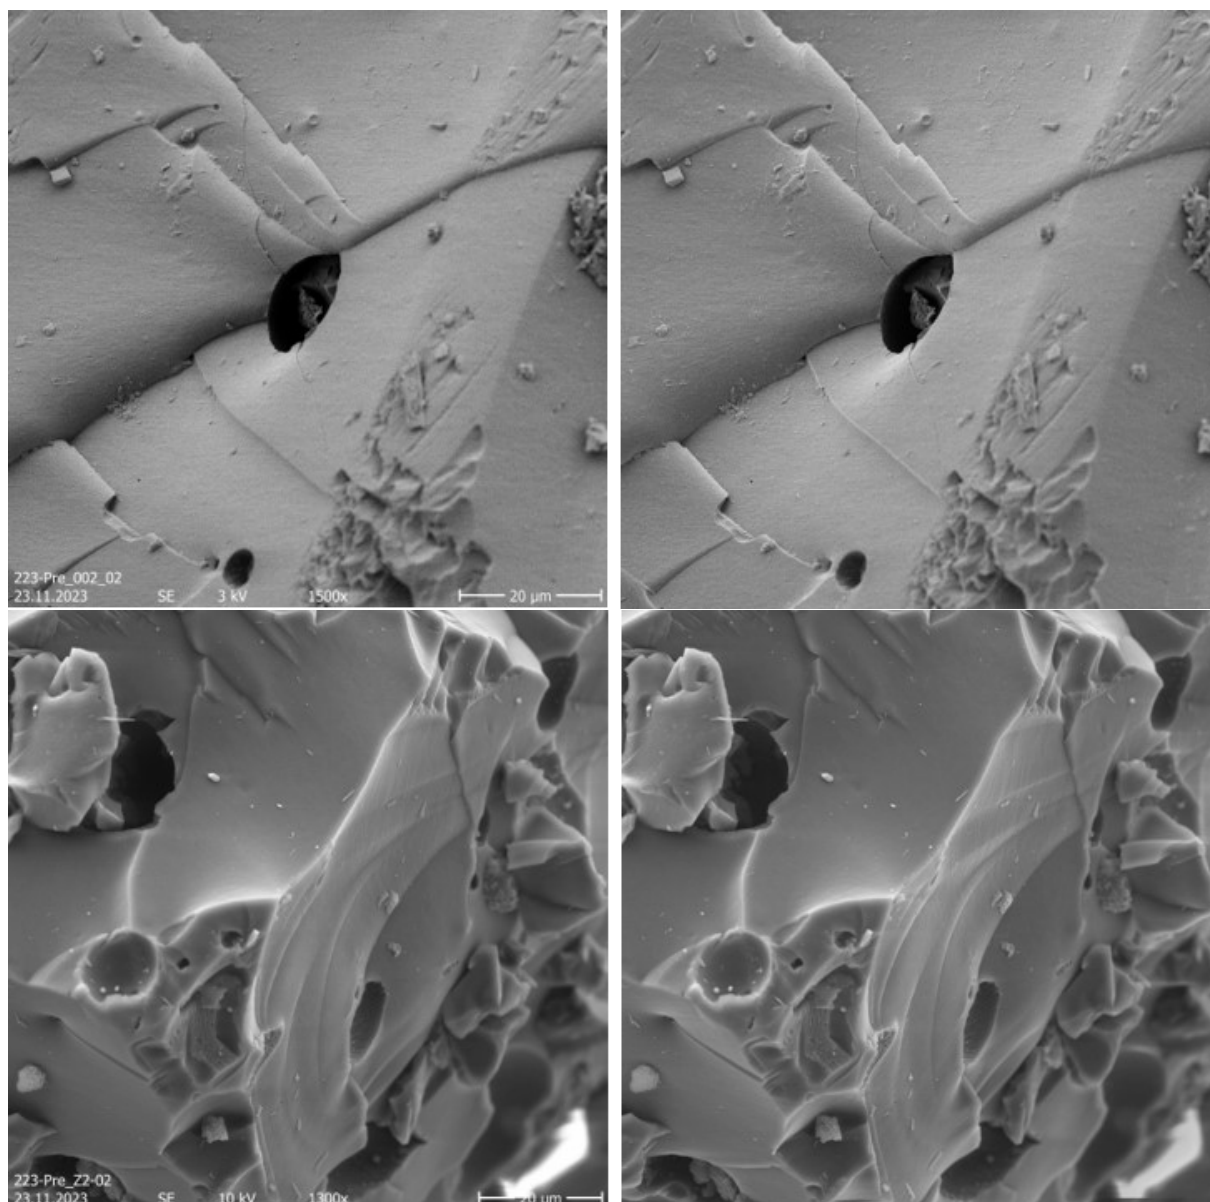

*Figure S7.2 SEM of as prepared PS-TRIP catalyst.*

Used catalyst

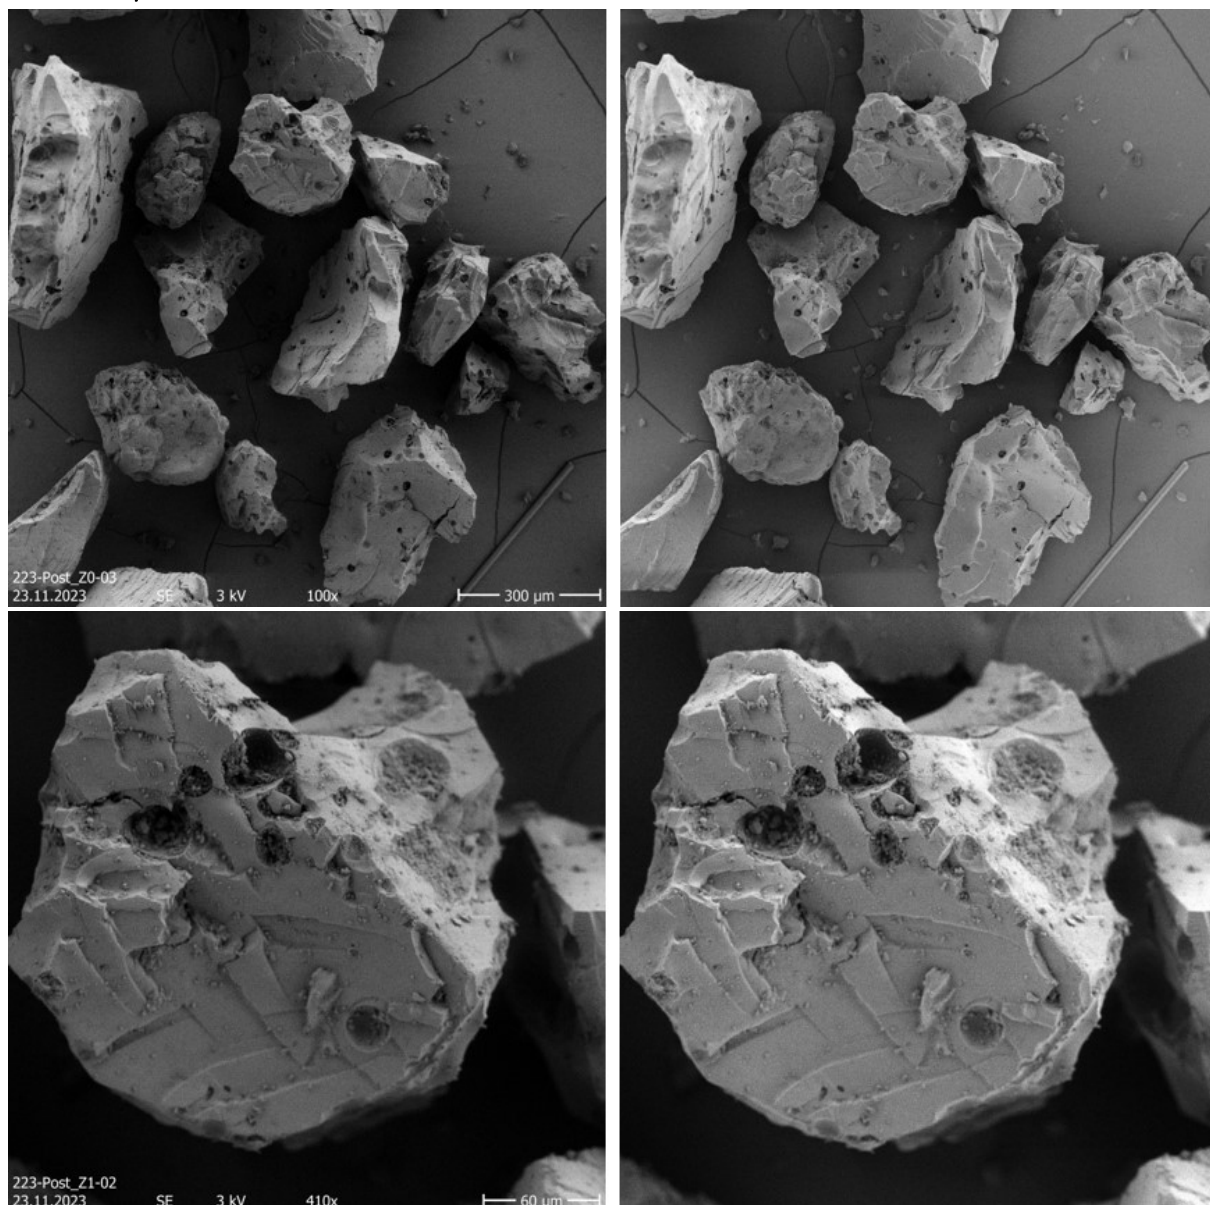

*Figure S8.1 SEM of used PS-TRIP catalyst.*

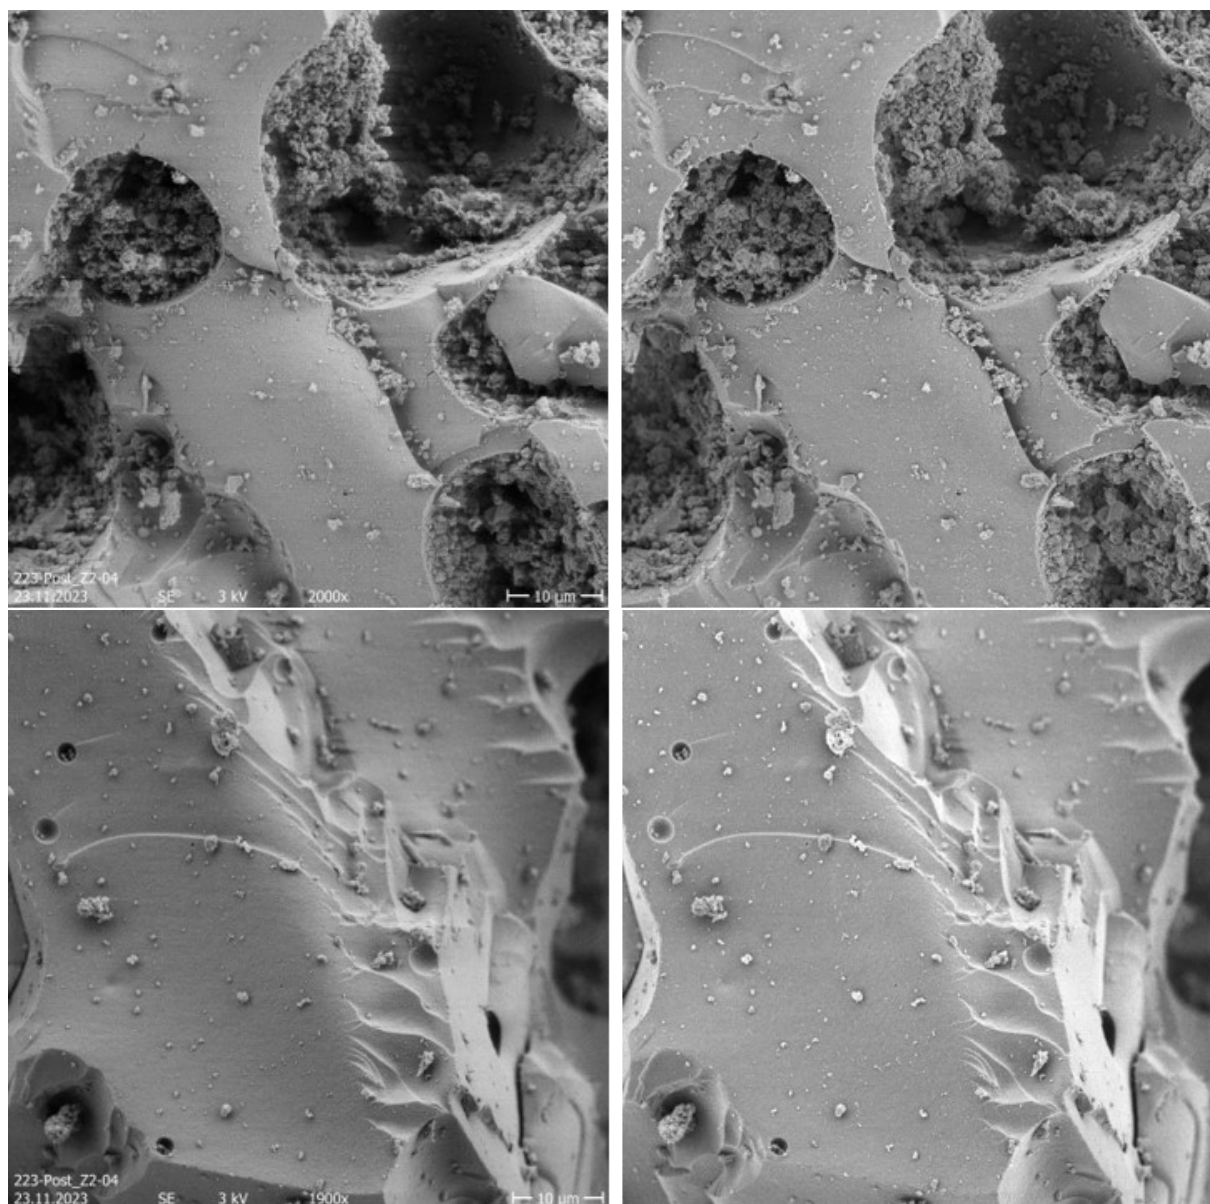

*Figure S8.2 SEM of used PS-TRIP catalyst.*

SEM-EDX

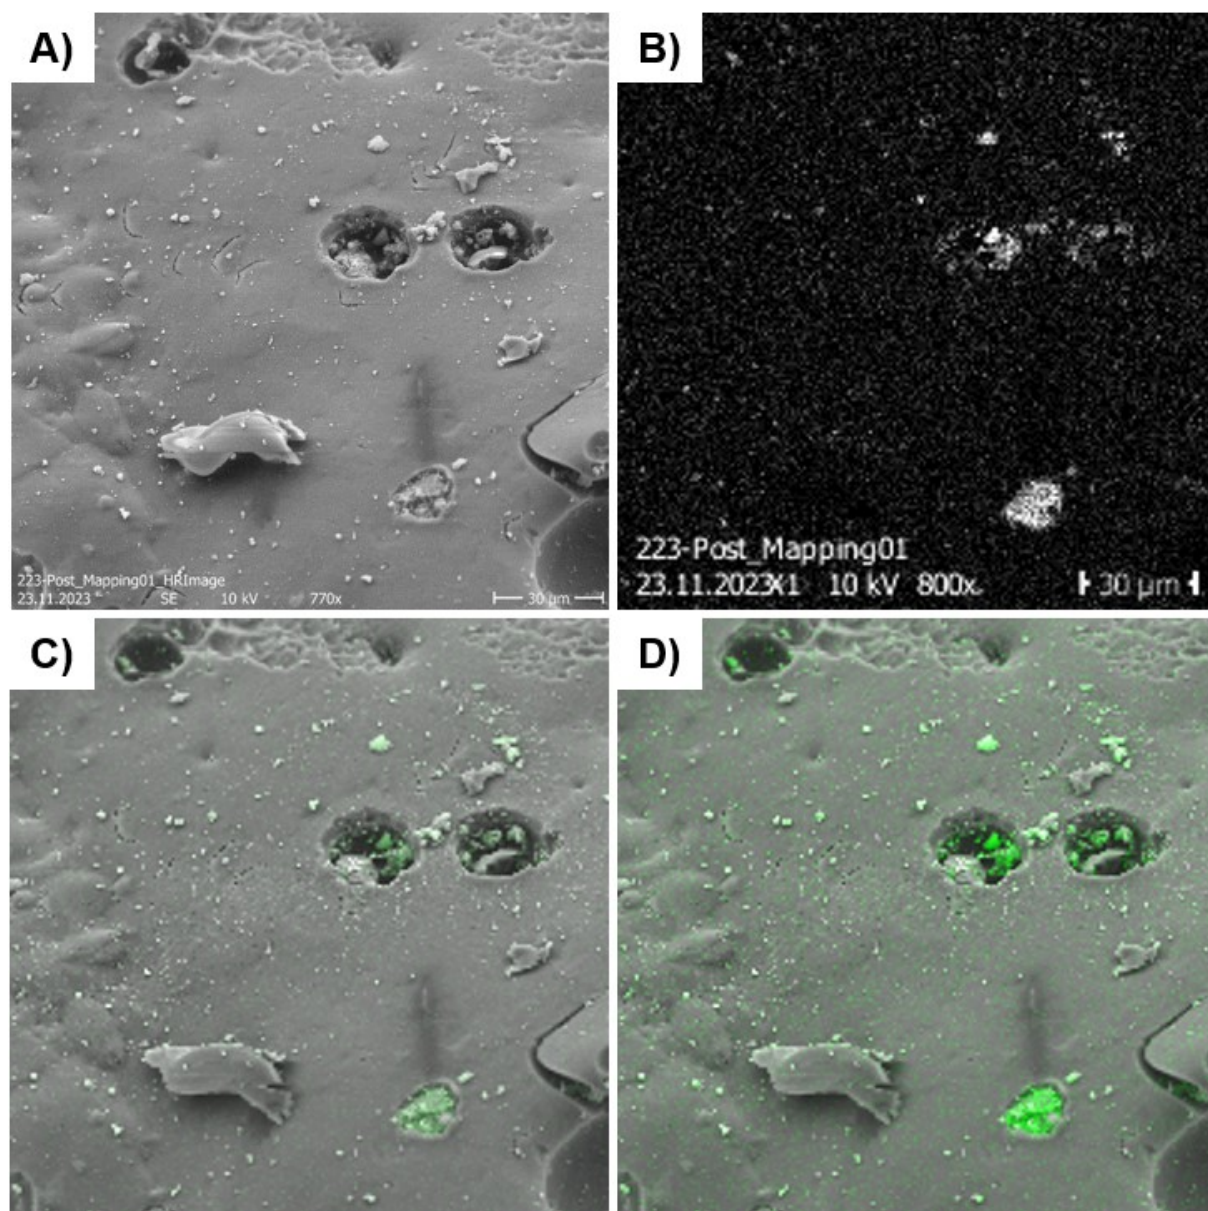

**Figure S9.** *A) SEM picture of the used PS-TRIP catalyst. B) SEM-EDX. C) Overlapped pictures, Si-containing particles are highlighted in green. D) Color saturation of C increased for clear visualization.*

# SEM-EDX

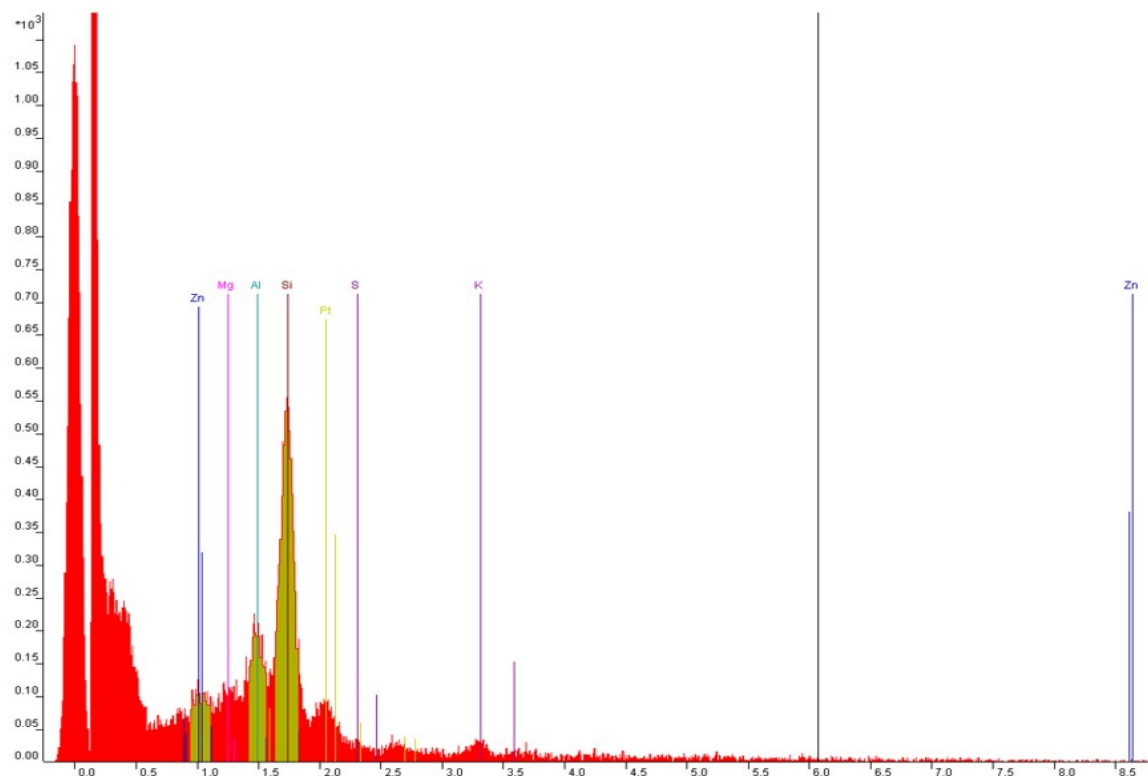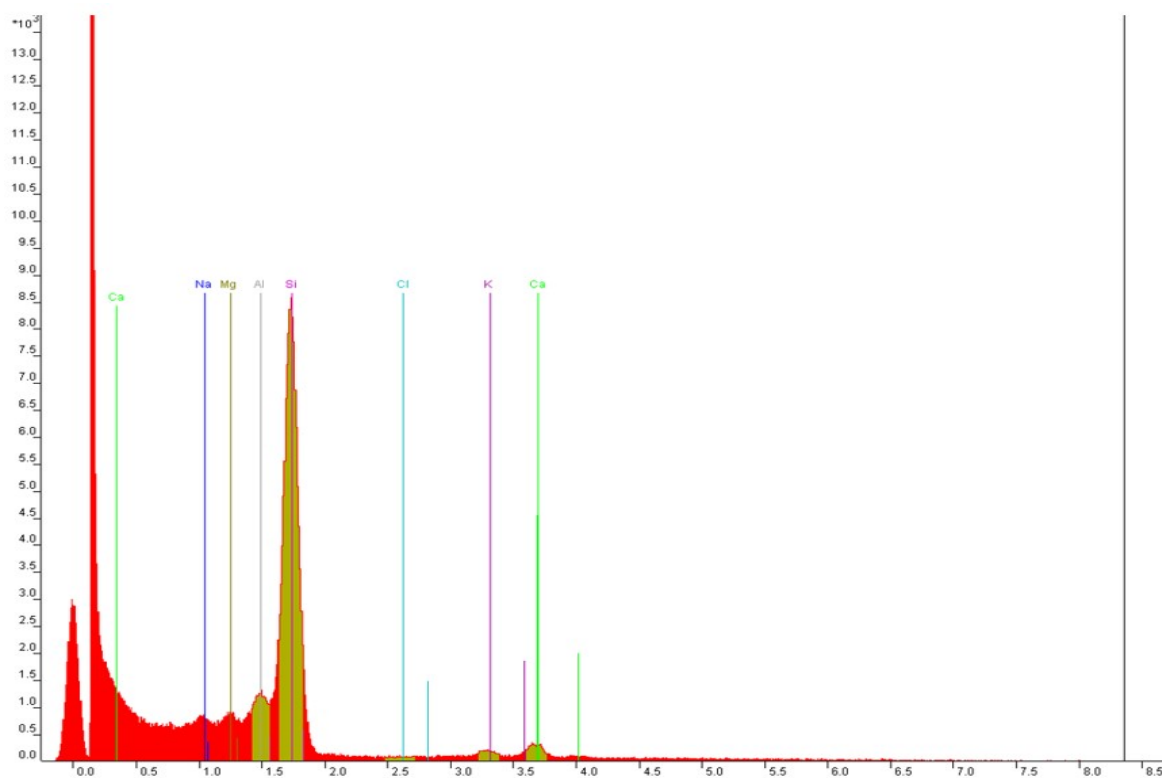

**Figure S10.** SEM-EDX element mapping: Deposition of the used PS-TRIP catalyst (Top). Glass wool reference sample (Bottom).

## General procedures for the batch synthesis of **3**

### General procedure for the synthesis of imine **1**:

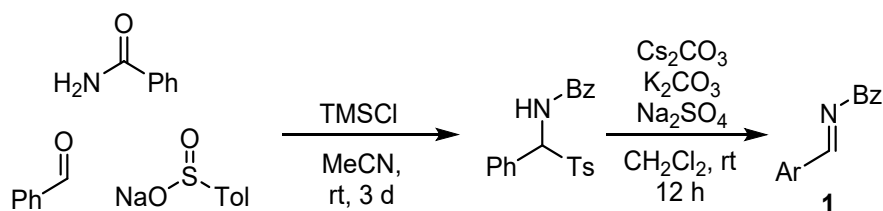

Imine **1** was synthesized at 100 mmol scale by a modified literature procedure:<sup>S4</sup>

**Step 1:** A 500 mL round-bottomed flask fitted with a dropping funnel and a magnetic stirrer was charged with sodium *p*-toluenesulfonate (26.7 g, 150 mmol, 1.5 equiv.) and benzamide (18.2 g, 150 mmol, 1.5 equiv.). The flask was then charged with acetonitrile (100 mL). To the resulting slurry was added benzaldehyde (10.2 mL, 100 mmol, 1.0 equiv.) in one portion. To this resulting mixture was slowly added TMSCl (25.4 mL, 200 mmol, 2.0 equiv.) using dropping funnel (15-30 min). The reaction was then monitored by TLC until reaction completion (2-3 days). Then, water (150 mL) was added and the resulting suspension was stirred for additional 30 min. The solids were isolated by filtration and the filter cake was washed with additional water (150 mL) and hexane (200 mL). The cake was dried in a vacuum oven at 50 °C at 1 torr for 12 h to give the product as a fine white solid in quantitative yield.

**Step 2:** To a 500 mL round bottom flask equipped with a magnetic stir bar was added Cs<sub>2</sub>CO<sub>3</sub> (16.3 g, 50 mmol, 0.5 equiv.) K<sub>2</sub>CO<sub>3</sub> (34.5 g, 250 mmol, 2.5 equiv.) and Na<sub>2</sub>SO<sub>4</sub> (42.6 g, 300 mmol, 3.0 equiv.). It was dried in a vacuum oven at 50 °C at 1 torr for 12 h and cooled down under nitrogen atmosphere. Then, the α-amido sulfone was added in one portion and suspended in anhydrous CH<sub>2</sub>Cl<sub>2</sub> (300 mL). The resulting slurry was vigorously stirred under nitrogen atmosphere for 3-5h and followed by NMR. Once the reaction was complete, the solids were filtered through oven-dried celite under vacuum. Removal of the filtrate in a vacuum provided 18.14 g (86%) of the pure imine as a yellowish liquid, which solidified as a crystalline white solid after 2 h under high vacuum.

### General procedure for the synthesis of racemic **3**.<sup>S1</sup>

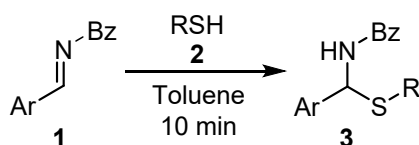

To a solution of imine (1.0 mmol, 1.0 equiv.) in toluene (5.0 mL) was added the corresponding thiol (1.0 mmol, 1.0 equiv.) at room temperature. The reaction was stirred for 10 min and then quenched with 0.25 M NaOCl solution (1.0 mL). The formed precipitate was filtered and washed with distilled water (5 mL) and cyclohexane (5 mL). The cake was dried in a vacuum oven at 50 °C at 1 torr for 12 h to give the pure product.

## Reaction optimization in batch

Imine **1** (20.9 mg, 0.1 mmol, 1.0 equiv.) was dissolved in the corresponding solvent (1.0 mL) and added to a screw-cap vial containing the **PS-TRIP** catalyst (33.3 mg, 0.005 mol, 0.005 equiv.). To the resulting mixture was added thiophenol **2a** (12.3  $\mu$ L, 0.12 mmol, 1.2 equiv.) at room temperature. The reaction was shaken for 10 min and then filtered, diluted in iPrOH and analyzed by HPLC.

The reaction was analyzed in several solvents to obtain the optimal ratio of enantioselectivity and solubility. Fast precipitation of the reaction product in the reaction mixture would make the process unsuitable in flow.

**Table S1.** Solvent optimization in batch (solubility test).

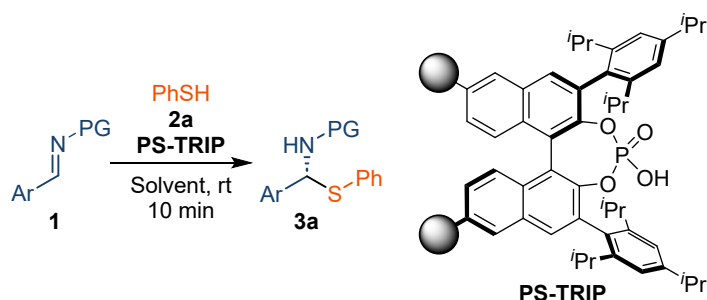

| Entry | Solvent           | Conv. (%) <sup>a</sup> | ee (%) <sup>b</sup> | Notes                 |
|-------|-------------------|------------------------|---------------------|-----------------------|
| 1     | Toluene           | >98                    | 94                  | Product precipitation |
| 2     | CHCl <sub>3</sub> | >98                    | 0                   | Soluble               |
| 3     | DMSO              | >98                    | 0                   | Soluble               |
| 4     | Acetone           | >98                    | 10                  | Soluble               |
| 5     | MeCN              | >98                    | 10                  | Product precipitation |
| 6     | MTBE              | >98                    | 0                   | Product precipitation |
| 7     | Tol/Acetone 9:1   | >98                    | 93                  | Product precipitation |
| 8     | Tol/Acetone 7:3   | >98                    | 91                  | Soluble               |
| 9     | Tol/Acetone 1:1   | >98                    | 87                  | Soluble               |

a) Conversion was determined by HPLC Area %.

b) ee was determined by chiral HPLC.

## Reaction optimization in flow

Prior to the reactions, the system was filled with toluene/acetone 7:3 mixture. The stock solutions of **1** (1.0 equiv.) and **2a** were pumped independently and combined just before the packed bed reactor (Entries 1-6) or mixed directly into the packed bed (Entries 7-17) using a Syrris® Asia syringe pump. In each run, the product stream was collected for 30 s after reaching steady state. Between each experiment, the reactor was washed with toluene/acetone 7:3. The resulting material was diluted in iPrOH analyzed by HPLC.

**Table S2.** Reaction optimization in flow.

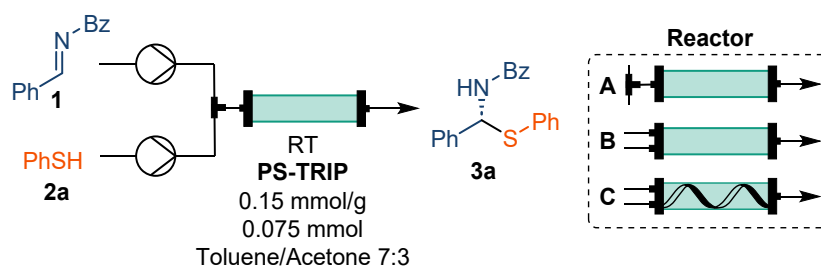

| Entry | 2a<br>(equiv.) | Flow rate (mL/min) |             | Reactor | Conv.<br>(%) <sup>a</sup> | ee<br>(%) <sup>b</sup> |
|-------|----------------|--------------------|-------------|---------|---------------------------|------------------------|
|       |                | Pump 1 (1)         | Pump 2 (2a) |         |                           |                        |
| 1     | 1.00           | 0.1                | 0.1         | A       | >98                       | 0                      |
| 2     | 1.00           | 0.25               | 0.25        | A       | >98                       | 10                     |
| 3     | 1.00           | 0.5                | 0.5         | A       | >98                       | 25                     |
| 4     | 1.00           | 0.75               | 0.75        | A       | >98                       | 43                     |
| 5     | 1.00           | 1.0                | 1.0         | A       | >98                       | 52                     |
| 6     | 1.00           | 1.5                | 1.5         | A       | >98                       | 51                     |
| 7     | 1.00           | 0.5                | 0.5         | B       | >98                       | 79                     |
| 8     | 1.00           | 1.0                | 1.0         | B       | >98                       | 80                     |
| 9     | 1.00           | 1.5                | 1.5         | B       | >98                       | 75                     |
| 10    | 1.00           | 2.0                | 2.0         | B       | >98                       | 70                     |
| 11    | 1.11           | 1.9                | 2.1         | B       | >98                       | 78                     |
| 12    | 1.22           | 1.8                | 2.2         | B       | >98                       | 82                     |
| 13    | 1.35           | 1.7                | 2.3         | B       | >98                       | 90                     |
| 14    | 1.50           | 1.6                | 2.4         | B       | >98                       | 93                     |
| 15    | 1.50           | 1.6                | 2.4         | C       | >98                       | 92                     |
| 16    | 1.22           | 1.8                | 2.2         | C       | >98                       | 92                     |
| 17    | 1.11           | 1.9                | 2.1         | C       | >98                       | 90                     |

a) Conversion was determined by HPLC Area %.

b) ee was determined by chiral HPLC.

### Procedure for filling the packed-bed reactor

The packed bed reactor was prepared as shown in Figure S3. The adjustable end of the Omnifit® glass column (10 mm ID) was opened and 0.5 g of dry catalyst was loaded (dried overnight at 40°C in a vacuum oven). The reactor was then filled with toluene to swell the resin, closed and adjusted as required. Both ends were closed with glass wool to prevent the catalyst particles from clogging the system.

### General procedure for the synthesis of **3** in continuous flow

0.5 g of **PS-TRIP** catalyst (0.075 mmol, 0.1 mol%) was loaded into a modified adjustable Omnifit® glass column (10 mm ID). Before the reactions, the catalyst bed was swollen by pumping toluene/acetone 7:3 at 4.0 mL/min for 5 min. The stock solutions (in toluene/acetone 7:3) of imine **1** (0.10 M, 1.80 mL/min, 1.0 equiv.) and **2a** (0.1 M, 2.20 mL/min, 1.2 equiv.) were pumped independently (4.0 mL/min overall flow rate) and combined in the modified Omnifit column containing the **PS-TRIP** catalyst by using a Syrris® Asia syringe pump. The pressure of the system generated by the packed bed reactor during the long run was 0.8 bar. The reaction outcome was quenched by pumping directly into an aqueous solution of 0.25 M NaClO.

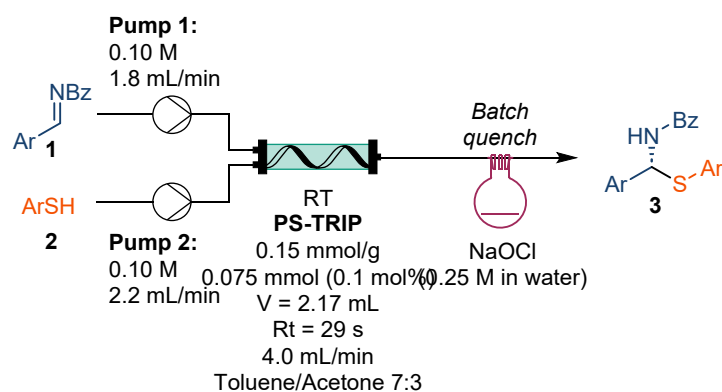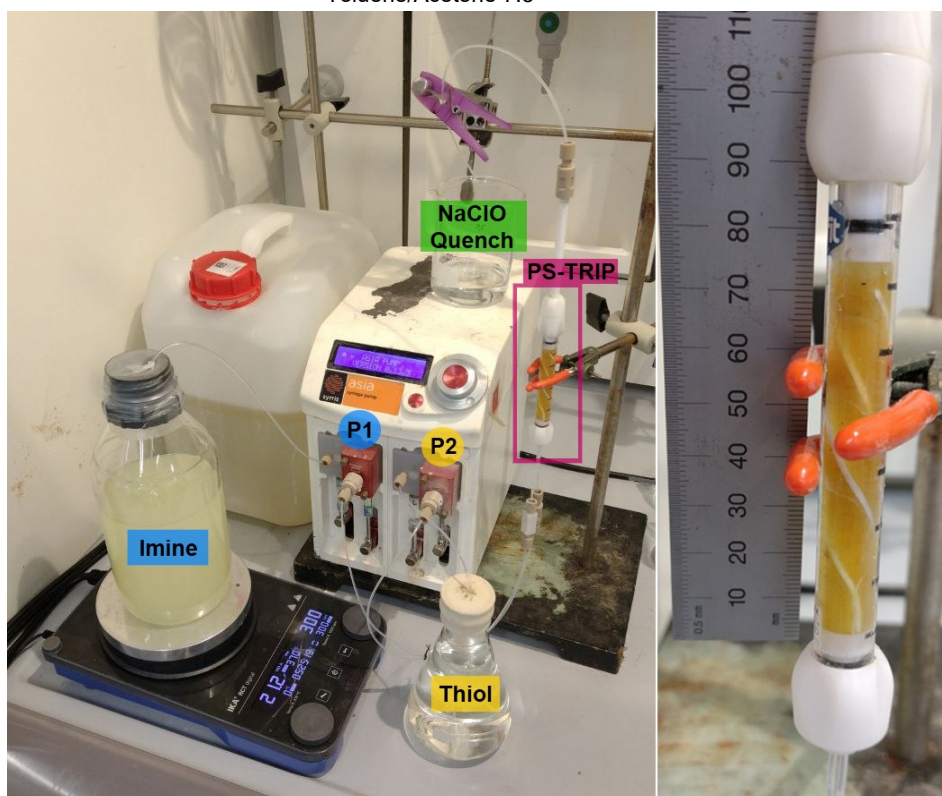

Figure S11. Optimal flow set up.

**Quenching for 30 min of reaction in continuous flow:** For analysis purposes, 30 min fractions were independently collected. The reaction mixture was pumped through a 0.25 M solution of NaClO (30 mL). After 1h precipitation of the product was observed and the crude was allowed to further precipitate for 6 h to ensure complete precipitation of the product.

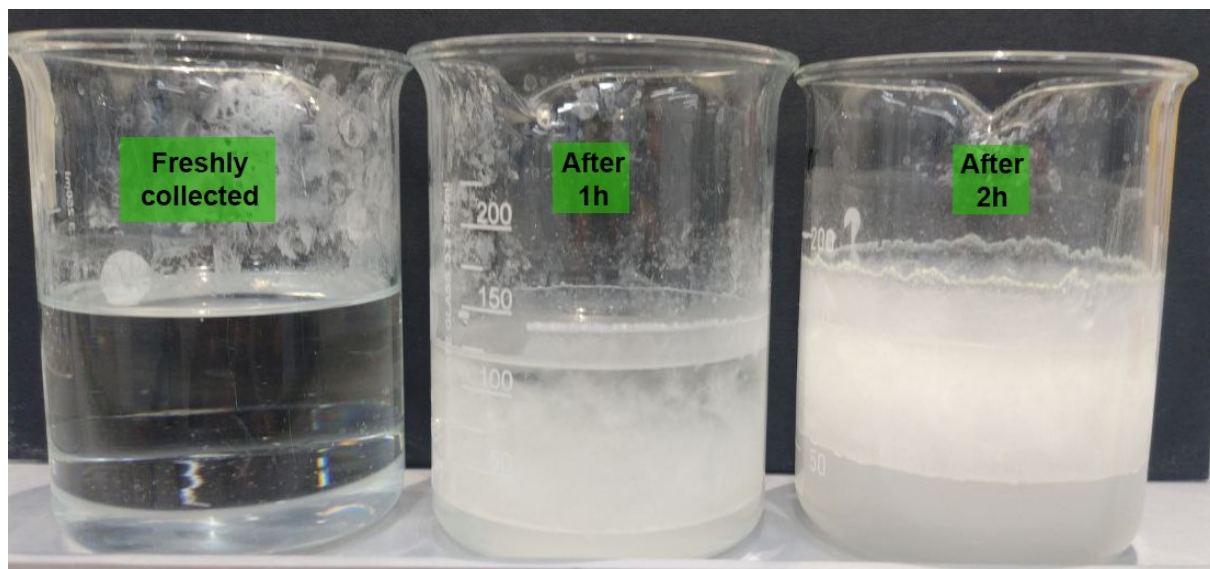

*Figure S12. Precipitation of the product over time.*

**Work up for 6 h reaction:** The combined fractions were filtered and washed with water (3x 200 mL) and cyclohexane (3x 250 mL). The cake was dried in a vacuum oven at 50 °C at 1 torr for 12 h to give the pure product (19.44 g, 94% yield, 92% ee).

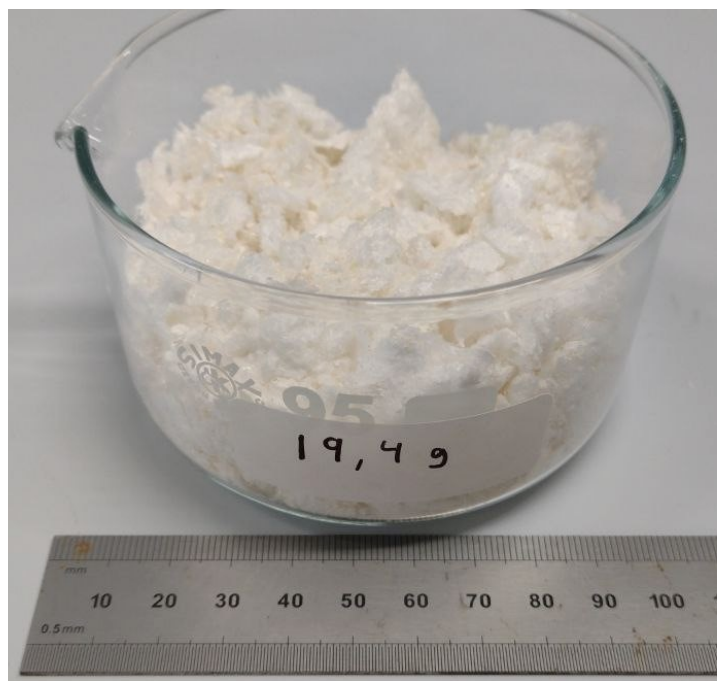

*Figure S13. Isolated product from the 6 h run.*

Green metrics, TRIP vs PS-TRIP comparison

**Table S3.** Homogeneous TRIP vs PS-TRIP and process comparison. Green flag: preferred; amber flag: some issues; red flag: undesirable.

| Entry |                                           | TRIP (homogeneous) <sup>S1</sup> | PS-TRIP                                   |
|-------|-------------------------------------------|----------------------------------|-------------------------------------------|
| 1     | Batch/Flow                                | Batch                            | Flow                                      |
| 2     | Catalyst recovery                         | No                               | Yes                                       |
| 3     | Workup                                    | Chromatography                   | Filtration                                |
| 4     | Solvent                                   | Toluene                          | Toluene Acetone                           |
| 5     | Solvents workup                           | Hexane EtOAc                     | Water Cyclohexane                         |
| 6     | Health concerns                           | PhSH: H300, H310, H330           |                                           |
| 7     | Environmental implications                | Hexane: H411                     | Cyclohexane: H410<br>NaClO solution: H410 |
|       |                                           | PhSH: H410                       |                                           |
| 8     | Yield (%)                                 | 98                               | 94                                        |
| 9     | PMI                                       | 1373.3                           | 143.3                                     |
| 10    | TON                                       | 49.0                             | 812.2                                     |
| 11    | STY (kg m <sup>-3</sup> h <sup>-1</sup> ) | -                                | 1493                                      |
| 12    | Atom Economy (%)                          | 100                              | 100                                       |
| 13    | Reaction Mass Efficiency (%)              | 91.7                             | 87.9                                      |
| 14    | Optimum Efficiency (%)                    | 91.7                             | 87.9                                      |
| 15    | E factor                                  | 1183.7                           | 78.4                                      |

For the Batch process metrics, 5.0 g of silica gel and 10 column volumes of EtOAc/Hexane 1:2 were considered, since no precise information was provided in the literature.<sup>S1</sup>

#### Catalyst metrics

Turnover number (TON) and space time yield (STY) were calculated for the 6h long run following the literature formulas.<sup>S5</sup>

$$TON = \frac{\text{mmoles limiting reactant}}{\text{mmoles catalyst}} \times \text{yield} = \frac{64.8}{0.075} \times 0.94 = 812.2$$

$$STY = \frac{\text{mass of product}}{\text{volume of reactor} \times \text{reaction time}} = \frac{1.944 \text{ e}^{-2} \text{ kg}}{2.17 \text{ e}^{-6} \text{ m}^3 \times 6 \text{ h}} = 1493.0 \text{ kg m}^{-3} \text{ h}^{-1}$$

The reactor volume used for the STY was calculated using the packed bed reactor volume. It was calculated according to the indications from the vendor and the volume corresponding to the spiral mixer (0.4 mL) was subtracted.

$$\text{Bed volume (mL)} = 0.3421 \times \text{bed height (cm)} - \text{spiral volume (mL)} = 0.3421 \times 7.5 - 0.4 = 2.16575 \text{ mL}$$

### Experimental residence time and steady state

Ferrocene 0.01 M solution was prepared by dissolving 186 mg of Ferrocene in 100 mL of Toluene/Acetone 7:3 mixture. The observed wavelength range was 438-443 nm. At time  $t=0$ , pure solvent was switched with Ferrocene solution and the flow rates were kept the same. UV/Vis spectra were recorded using a fibre-coupled Avantes Starline AvaSpec-2048 spectrometer, with an Avantes AvaLight-DHc lamp as the light source. These spectra were processed using Avasoft 8.7 software. Each experiment was done by duplicate and the shown data represent the average of both measurements.

| Flow rate                | 4 mL/min | 2 mL/min | 1 mL/min |
|--------------------------|----------|----------|----------|
| Residence time ( $R_T$ ) | 29 s     | 52 s     | 80 s     |
| Steady state             | 80 s     | 140 s    | 270 s    |

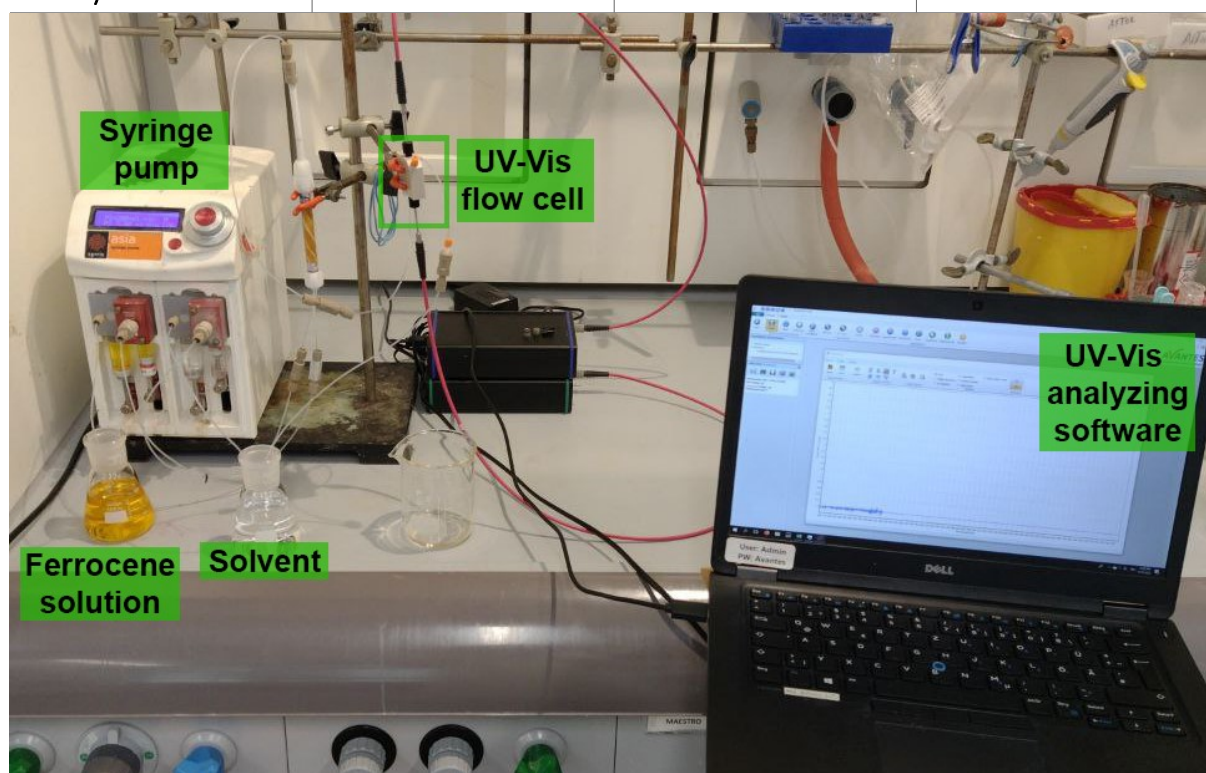

*Figure S14. Set up for measuring the residence time and steady state.*

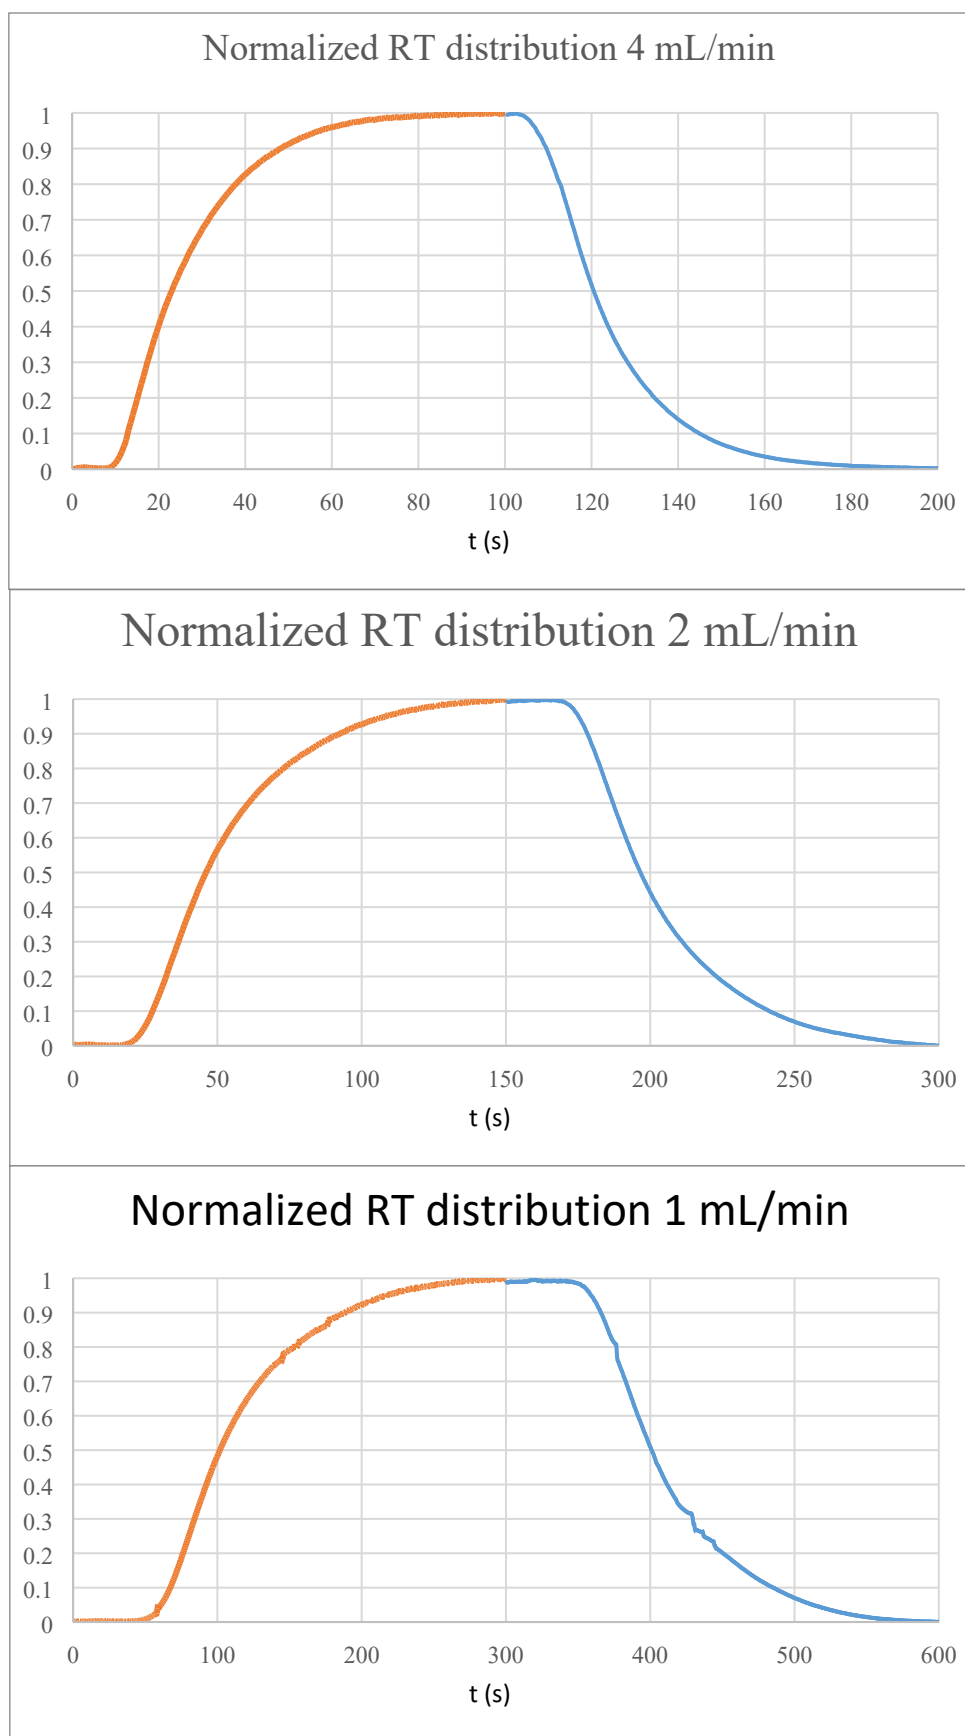

**Figure S15.** Normalized RT distribution graphs. Colour change indicates the point where the tracer was switched to solvent.

### Characterization data of **3**

#### (*R*)-*N*-(phenyl(phenylthio)methyl)benzamide (**3a**)

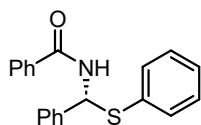

The general procedure was followed.

Optimal flow rates: 1.8 mL/min of **1** and 2.2 mL/min **2** (4.0 mL/min in total).

The product was collected for 6h after the steady state, affording 19.44 g (94%) of the product as a white solid. The reported data match the literature.<sup>S1</sup>

**<sup>1</sup>H NMR** (300 MHz, CDCl<sub>3</sub>) δ 7.68 – 7.61 (m, 2H), 7.54 – 7.45 (m, 5H), 7.43 – 7.32 (m, 5H), 7.29 – 7.26 (m, 3H), 6.83 – 6.68 (m, 2H).

**<sup>13</sup>C {<sup>1</sup>H} NMR** (75 MHz, CDCl<sub>3</sub>) δ 166.5, 138.7, 134.0, 133.0, 132.5, 132.0, 129.3, 128.9, 128.8, 128.6, 128.1, 127.0, 126.8, 59.8.

**HRMS** (TOF+, *m/z*): calcd for C<sub>20</sub>H<sub>17</sub>NOSNa [M+Na]<sup>+</sup>: 342.0923, found: 342.0930.

$$[\alpha]_{589}^{25} = \frac{100 \times -0.0193}{0.5 \times 1} = -3.86, \text{ measured in CHCl}_3.$$

Literature data for (*S*)-**3a** (99% ee), *c*=0.5 (in CHCl<sub>3</sub>): -4.0.<sup>S1</sup>

**HPLC (chiral)**: Chiralcel-IC, *n*-heptane/*i*-PrOH 80:20, 1.0 mL/min, 25 °C, detection at 254 nm.

Residence time: 7.1 min (major), 8.0 (minor). 92% ee.

#### (*R*)-*N*-(phenyl(*p*-tolylthio)methyl)benzamide (**3b**)

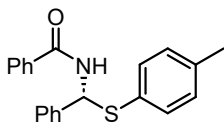

The general procedure was followed.

Optimal flow rates: 1.8 mL/min of **1** and 2.2 mL/min **2** (4.0 mL/min in total).

The product was collected for 5 min after the steady state, affording 279 mg (93%) of the product as a white solid.

**<sup>1</sup>H NMR** (300 MHz, CDCl<sub>3</sub>) δ 7.66 (d, *J* = 6.9 Hz, 2H), 7.53 – 7.43 (m, 3H), 7.43 – 7.29 (m, 7H), 7.08 (d, *J* = 7.8 Hz, 2H), 6.77 (d, *J* = 9.1 Hz, 1H), 6.69 (d, *J* = 9.1 Hz, 1H), 2.30 (s, 3H).

**<sup>13</sup>C {<sup>1</sup>H} NMR** (75 MHz, CDCl<sub>3</sub>) δ 166.4, 138.9, 138.5, 134.0, 133.3, 131.9, 130.0, 129.1, 128.9, 128.7, 128.4, 127.0, 126.8, 60.1, 21.3.

**HRMS** (TOF+, *m/z*): calcd for C<sub>21</sub>H<sub>19</sub>NOSNa [M+Na]<sup>+</sup>: 356.1079, found: 356.1092.

**HPLC (chiral)**: Chiralcel-IC, *n*-heptane/*i*-PrOH 80:20, 1.0 mL/min, 25 °C, detection at 254 nm.

Residence time: 8.1 min (major), 9.0 (minor). 88% ee.

#### (*R*)-*N*-(((4-fluorophenyl)thio)(phenyl)methyl)benzamide (**3c**)

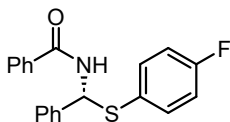

The general procedure was followed.

Optimal flow rates: 1.8 mL/min of **1** and 2.2 mL/min **2** (4.0 mL/min in total).

The product was collected for 5 min after the steady state, affording 273 mg (90%) of the product as a white solid.

**<sup>1</sup>H NMR** (300 MHz, CDCl<sub>3</sub>) δ 7.66 (d, *J* = 8.5 Hz, 2H), 7.54 – 7.30 (m, 10H), 6.96 (t, *J* = 8.7 Hz, 2H), 6.70 (s, 2H).

**<sup>13</sup>C {<sup>1</sup>H} NMR** (75 MHz, CDCl<sub>3</sub>) δ 166.3, 163.1 (d, *J* = 248.9 Hz), 138.6, 135.8 (d, *J* = 8.3 Hz), 133.9, 132.1, 129.0, 128.8, 128.7, 127.9 (d, *J* = 3.4 Hz), 127.0, 126.8, 116.4 (d, *J* = 21.9 Hz), 60.5.

**<sup>19</sup>F NMR** (282 MHz, CDCl<sub>3</sub>) δ -112.5.

**HRMS** (TOF+, *m/z*): calcd for C<sub>20</sub>H<sub>16</sub>FNOSNa [M+Na]<sup>+</sup>: 360.0829, found: 360.0843.

**HPLC (chiral)**: Chiralcel-IC, n-heptane/*i*-PrOH 80:20, 1.0 mL/min, 25 °C, detection at 254 nm.

Residence time: 6.2 min (major), 7.1 (minor). 86% ee.

#### (*R*)-*N*-(((4-methoxyphenyl)thio)(phenyl)methyl)benzamide (3d)

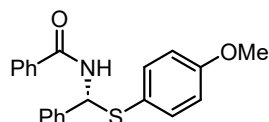

The general procedure was followed.

Optimal flow rates: 1.8 mL/min of **1** and 2.2 mL/min **2** (4.0 mL/min in total).

The product was collected for 5 min after the steady state, affording 286 mg (91%) of the product as a white solid. The reported data match the literature.<sup>51</sup>

**<sup>1</sup>H NMR** (300 MHz, CDCl<sub>3</sub>) δ 7.66 (d, *J* = 8.4 Hz, 2H), 7.52 – 7.28 (m, 10H), 6.80 (d, *J* = 8.8 Hz, 2H), 6.68 (d, *J* = 9.2 Hz, 1H), 6.59 (d, *J* = 9.2 Hz, 1H), 3.76 (s, 3H).

**<sup>13</sup>C {<sup>1</sup>H} NMR** (75 MHz, CDCl<sub>3</sub>) δ 166.3, 160.3, 139.0, 136.2, 134.1, 131.9, 128.9, 128.8, 128.4, 127.0, 126.8, 122.9, 114.8, 60.8, 55.5.

**HRMS** (TOF+, *m/z*): calcd for C<sub>21</sub>H<sub>19</sub>NO<sub>2</sub>SNa [M+Na]<sup>+</sup>: 372.1029, found: 372.1047.

**HPLC (chiral)**: Chiralcel-IC, n-heptane/*i*-PrOH 80:20, 1.0 mL/min, 25 °C, detection at 254 nm.

Residence time: 10.3 min (major), 11.2 (minor). 87% ee.

#### (*R*)-*N*-(((2-chlorophenyl)thio)(phenyl)methyl)benzamide (3e)

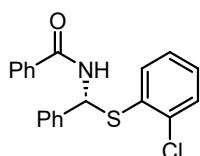

The general procedure was followed.

Optimal flow rates: 1.8 mL/min of **1** and 2.2 mL/min **2** (4.0 mL/min in total).

The product was collected for 5 min after the steady state, affording 312 mg (98%) of the product as a white solid.

**<sup>1</sup>H NMR** (300 MHz, CDCl<sub>3</sub>) δ 7.68 (d, *J* = 8.4 Hz, 2H), 7.59 – 7.52 (m, 3H), 7.52 – 7.45 (m, 1H), 7.44 – 7.29 (m, 6H), 7.22 – 7.13 (m, 2H), 6.92 (d, *J* = 9.2 Hz, 1H), 6.87 (d, *J* = 9.2 Hz, 1H).

**<sup>13</sup>C {<sup>1</sup>H} NMR** (75 MHz, CDCl<sub>3</sub>) δ 166.5, 138.1, 136.0, 133.7, 133.1, 132.7, 132.0, 130.1, 129.0, 129.0 (2), 128.8, 128.7, 127.6, 127.1, 126.8, 59.1.

**HRMS** (TOF+, *m/z*): calcd for C<sub>20</sub>H<sub>16</sub>ClNOSNa [M+Na]<sup>+</sup>: 376.0533, found: 376.0551.

**HPLC (chiral)**: Chiralcel-IC, n-heptane/*i*-PrOH 80:20, 1.0 mL/min, 25 °C, detection at 254 nm.

Residence time: 6.2 min (major), 7.5 (minor). 88% ee.

**(*R*)-N-(((2,4-dimethylphenyl)thio)(phenyl)methyl)benzamide (3f)**

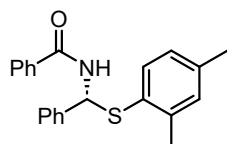

The general procedure was followed.

Optimal flow rates: 1.8 mL/min of **1** and 2.2 mL/min **2** (4.0 mL/min in total).

The product was collected for 5 min after the steady state, affording 295 mg (94%) of the product as a white solid.

**<sup>1</sup>H NMR** (300 MHz, CDCl<sub>3</sub>) δ 7.65 (d, *J* = 8.4 Hz, 2H), 7.51 – 7.45 (m, 3H), 7.44 – 7.30 (m, 6H), 7.03 (d, *J* = 2.0 Hz, 1H), 6.90 (dd, *J* = 7.8, 2.0 Hz, 1H), 6.69 (d, *J* = 9.0 Hz, 1H), 6.61 (d, *J* = 9.0 Hz, 1H), 2.42 (s, 3H), 2.27 (s, 3H).

**<sup>13</sup>C {<sup>1</sup>H} NMR** (75 MHz, CDCl<sub>3</sub>) δ 166.4, 140.8, 139.1, 138.7, 134.1, 134.0, 131.9, 131.6, 128.9, 128.7, 128.5, 127.5, 127.0, 126.7, 59.2, 21.2, 20.8.

**HRMS** (TOF+, *m/z*): calcd for C<sub>22</sub>H<sub>21</sub>NOSNa [M+Na]<sup>+</sup>: 370.1236, found: 370.1259.

**HPLC (chiral)**: Chiralcel-IC, n-heptane/*i*-PrOH 90:10, 1.0 mL/min, 25 °C, detection at 254 nm.

Residence time: 11.3 min (major), 13.7 (minor). 85% ee.

**(*R*)-N-(((4-methoxybenzyl)thio)(phenyl)methyl)benzamide (3g)**

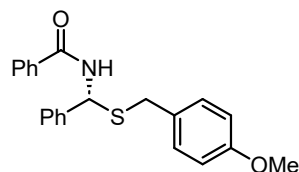

The general procedure was followed.

Optimal flow rates: 0.9 mL/min of **1** and 1.1 mL/min **2** (2.0 mL/min in total).

The product was collected for 10 min after the steady state, affording 281 mg (86%) of the product as a white solid.

**<sup>1</sup>H NMR** (300 MHz, CDCl<sub>3</sub>) δ 7.65 (d, *J* = 8.6 Hz, 2H), 7.56 – 7.48 (m, 1H), 7.47 – 7.38 (m, 4H), 7.38 – 7.25 (m, 5H), 6.81 (d, *J* = 8.6 Hz, 2H), 6.57 (d, *J* = 9.0 Hz, 1H), 6.42 (d, *J* = 9.0 Hz, 1H), 3.88 (d, *J* = 13.7 Hz, 1H), 3.80 (d, *J* = 13.7 Hz, 1H), 3.75 (s, 3H).

**<sup>13</sup>C {<sup>1</sup>H} NMR** (75 MHz, CDCl<sub>3</sub>) δ 166.2, 158.9, 139.1, 133.7, 132.0, 130.4, 130.1, 128.9, 128.7, 128.3, 127.1, 126.7, 114.2, 57.6, 55.4, 35.9.

**HRMS** (TOF+, *m/z*): calcd for C<sub>22</sub>H<sub>21</sub>NO<sub>2</sub>Na [M+Na]<sup>+</sup>: 386.1185, found: 386.1197.

**HPLC (chiral)**: Chiralcel-IC, n-heptane/*i*-PrOH 80:20, 1.0 mL/min, 25 °C, detection at 254 nm.

Residence time: 10.4 min (major), 11.4 (minor). 81% ee.

**(*R*)-N-(((4-fluorobenzyl)thio)(phenyl)methyl)benzamide (3h)**

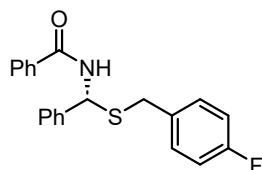

The general procedure was followed.

Optimal flow rates: 0.45 mL/min of **1** and 0.55 mL/min **2** (1.0 mL/min in total).

The product was collected for 20 min after the steady state, affording 275 mg (87%) of the product as a white solid.

**<sup>1</sup>H NMR** (300 MHz, CDCl<sub>3</sub>) δ 7.70 (d, *J* = 8.5 Hz, 2H), 7.53 (ddt, *J* = 8.3, 6.5, 1.4 Hz, 1H), 7.44 – 7.42 (m, 4H), 7.34 – 7.31 (m, 5H), 6.97 (t, *J* = 8.7 Hz, 2H), 6.64 (d, *J* = 9.3 Hz, 1H), 6.45 (d, *J* = 9.3 Hz, 1H), 3.91 (d, *J* = 13.8 Hz, 1H), 3.80 (d, *J* = 13.8 Hz, 1H).

**<sup>13</sup>C {<sup>1</sup>H} NMR** (75 MHz, CDCl<sub>3</sub>) δ 166.35, 162.1 (d, *J* = 245.8 Hz), 138.9, 134.1 (d, *J* = 3.2 Hz), 133.6, 132.1, 130.6 (d, *J* = 8.1 Hz), 129.0, 128.8, 128.5, 127.1, 126.6, 115.7 (d, *J* = 21.5 Hz), 57.5, 35.8.

**<sup>19</sup>F NMR** (282 MHz, CDCl<sub>3</sub>) δ -115.28.

**HRMS** (TOF+, *m/z*): calcd for C<sub>21</sub>H<sub>18</sub>FNOSNa [M+Na]<sup>+</sup>: 374.0985, found: 374.0995.

**HPLC (chiral)**: Chiralcel-IE, n-heptane/*i*-PrOH 80:20, 1.0 mL/min, 25 °C, detection at 254 nm.

Residence time: 11.5 min (major), 13.3 (minor). 86% ee.

### (*R*)-2-((benzamido(phenyl)methyl)thio)acetic acid (**3i**)

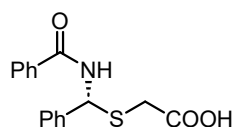

The general procedure was followed.

Optimal flow rates: 0.45 mL/min of **1** and 0.55 mL/min **2** (1.0 mL/min in total).

The product was collected for 20 min after the steady state, affording 211 mg (78%) of the product as a white solid.

**<sup>1</sup>H NMR** (300 MHz, DMSO-*d*<sub>6</sub>) δ 9.36 (d, *J* = 9.1 Hz, 1H), 7.91 (d, *J* = 8.5 Hz, 2H), 7.59 – 7.52 (m, 3H), 7.51 – 7.45 (m, 2H), 7.41 – 7.29 (m, 3H), 6.51 (d, *J* = 9.1 Hz, 1H), 3.47 (d, *J* = 15.7 Hz, 1H), 3.34 (d, *J* = 15.7 Hz, 1H).

\*The doublet at 3.34 ppm is overlapped with the water present in the DMSO.

**<sup>13</sup>C {<sup>1</sup>H} NMR** (75 MHz, DMSO-*d*<sub>6</sub>) δ 171.2, 166.2, 139.5, 133.8, 131.6, 128.5, 128.3, 128.0, 127.7, 127.0, 56.7, 33.4.

**HRMS** (TOF+, *m/z*): calcd for C<sub>16</sub>H<sub>15</sub>NO<sub>3</sub>Na [M+Na]<sup>+</sup>: 324.0665, found: 324.0675.

**HPLC (chiral)**: Chiralcel-IC, n-heptane/*i*-PrOH 80:20, 1.0 mL/min, 25 °C, detection at 254 nm.

Residence time: 7.9 min (major), 9.3 (minor). 54% ee.

### methyl (*R*)-2-((benzamido(phenyl)methyl)thio)acetate (**3j**)

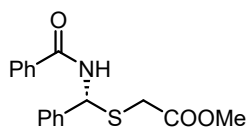

The general procedure was followed.

Optimal flow rates: 0.45 mL/min of **1** and 0.55 mL/min **2** (1.0 mL/min in total).

The product was collected for 20 min after the steady state, affording 235 mg (83%) of the product as a white solid.

**<sup>1</sup>H NMR** (300 MHz, CDCl<sub>3</sub>) δ 8.07 (d, *J* = 8.7 Hz, 1H), 7.92 (d, *J* = 8.4 Hz, 2H), 7.55 – 7.42 (m, 5H), 7.38 – 7.27 (m, 3H), 6.62 (d, *J* = 8.7 Hz, 1H), 3.68 (s, 3H), 3.30 (d, *J* = 16.3 Hz, 1H), 3.23 (d, *J* = 16.3 Hz, 1H).

**<sup>13</sup>C {<sup>1</sup>H} NMR** (75 MHz, CDCl<sub>3</sub>) δ 172.7, 166.1, 138.0, 133.6, 131.9, 128.8, 128.7, 128.3, 127.3, 126.7, 57.5, 53.0, 32.4.

**HRMS** (TOF+, *m/z*): calcd for C<sub>17</sub>H<sub>17</sub>NO<sub>3</sub>Na [M+Na]<sup>+</sup>: 338.0821, found: 338.0846.

**HPLC (chiral)**: Chiralcel-IC, n-heptane/*i*-PrOH 80:20, 1.0 mL/min, 25 °C, detection at 254 nm.

Residence time: 14.8 min (major), 17.0 (minor). 89% ee.

Chiral HPLC chromatograms of **3**  
*(R)*-N-(phenyl(phenylthio)methyl)benzamide (**4a**)

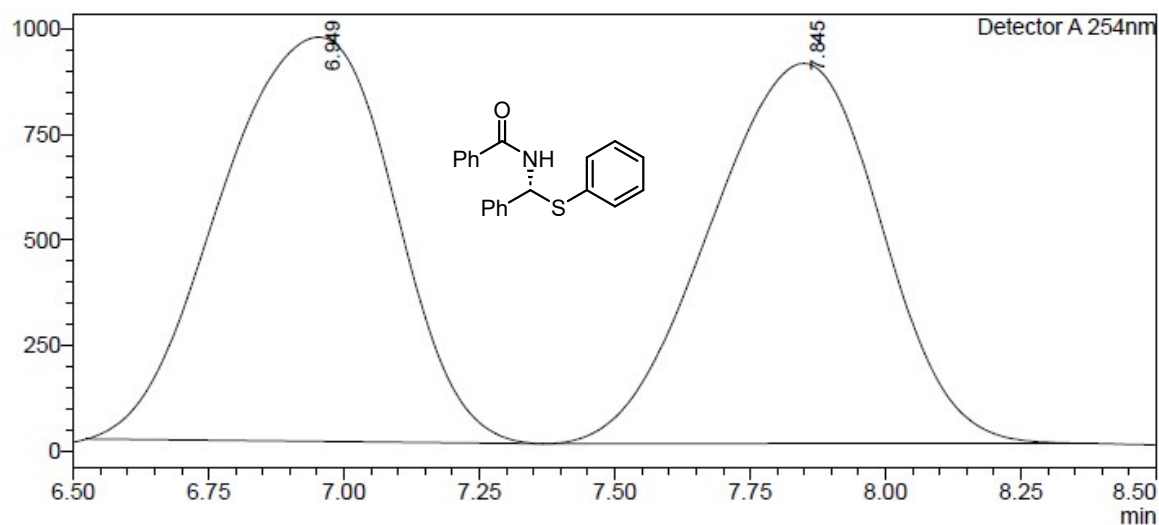

<Peak Table>

Detector A 254nm

| Peak# | Ret. Time | Area     | Height  | Conc.  | Name | Area%   |
|-------|-----------|----------|---------|--------|------|---------|
| 1     | 6.949     | 21335632 | 958173  | 51.943 |      | 51.943  |
| 2     | 7.845     | 19739096 | 900850  | 48.057 |      | 48.057  |
| Total |           | 41074728 | 1859023 |        |      | 100.000 |

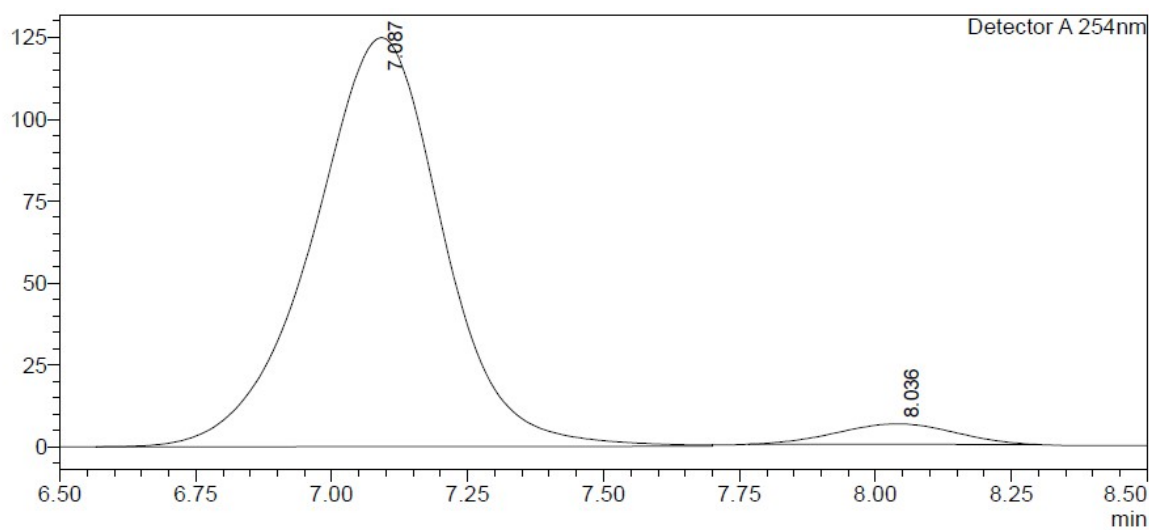

<Peak Table>

Detector A 254nm

| Peak# | Ret. Time | Area    | Height | Conc.  | Name | Area%   |
|-------|-----------|---------|--------|--------|------|---------|
| 1     | 7.087     | 2077350 | 124874 | 95.646 |      | 95.646  |
| 2     | 8.036     | 94555   | 6267   | 4.354  |      | 4.354   |
| Total |           | 2171905 | 131141 |        |      | 100.000 |

(R)-N-(phenyl(p-tolylthio)methyl)benzamide (3b)

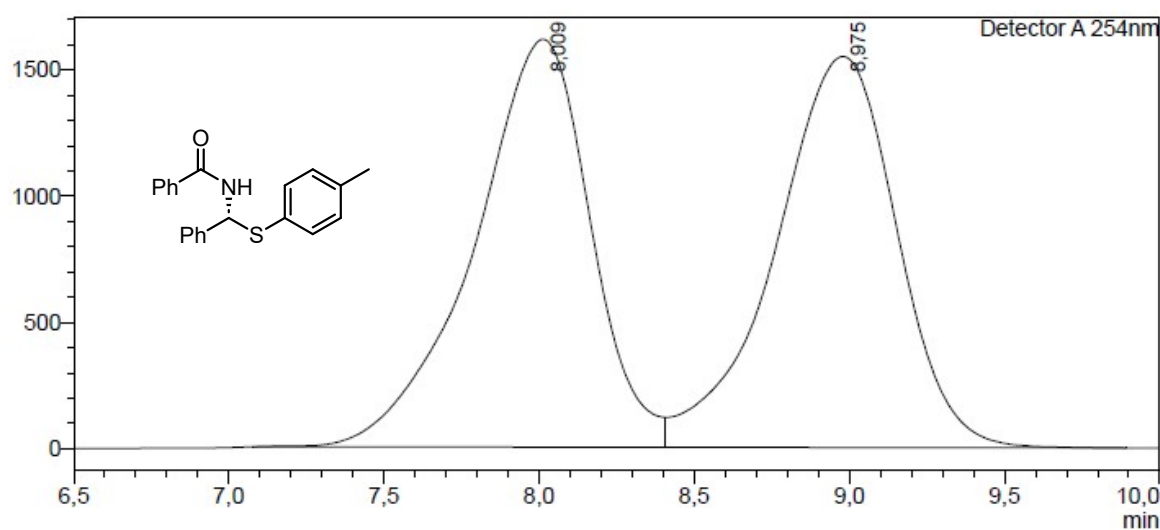

<Peak Table>

Detector A 254nm

| Peak# | Ret. Time | Area     | Height  | Conc.  | Unit | Mark | Name |
|-------|-----------|----------|---------|--------|------|------|------|
| 1     | 8,009     | 42057579 | 1615780 | 49,886 |      | M    |      |
| 2     | 8,975     | 42250261 | 1550476 | 50,114 |      | V M  |      |
| Total |           | 84307840 | 3166257 |        |      |      |      |

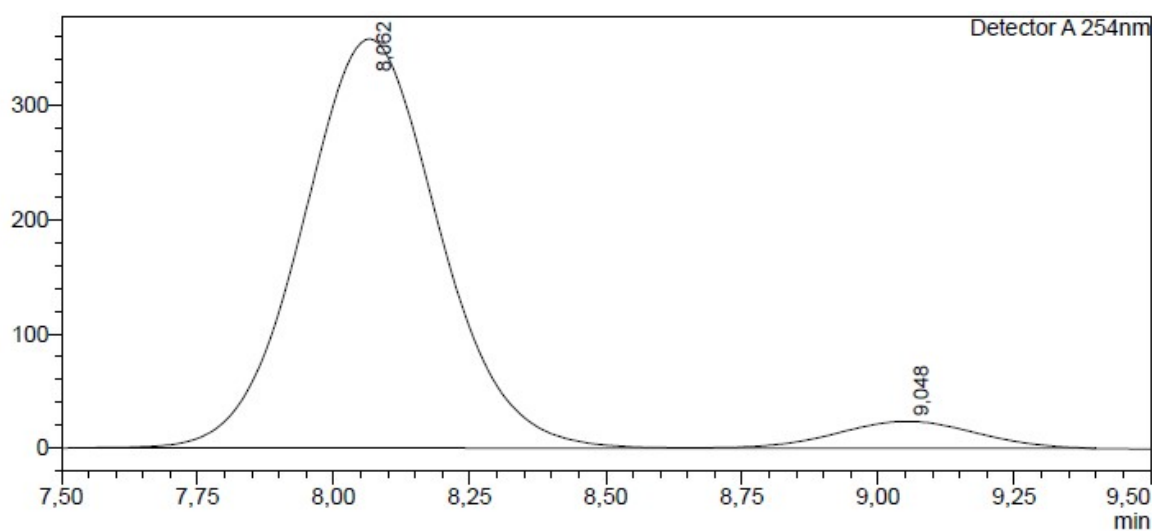

<Peak Table>

Detector A 254nm

| Peak# | Ret. Time | Area    | Height | Conc.  | Unit | Mark | Name |
|-------|-----------|---------|--------|--------|------|------|------|
| 1     | 8,062     | 6247234 | 358044 | 93,663 |      | M    |      |
| 2     | 9,048     | 422705  | 23577  | 6,337  |      | V M  |      |
| Total |           | 6669939 | 381621 |        |      |      |      |

(R)-N-(((4-fluorophenyl)thio)(phenyl)methyl)benzamide (3c)

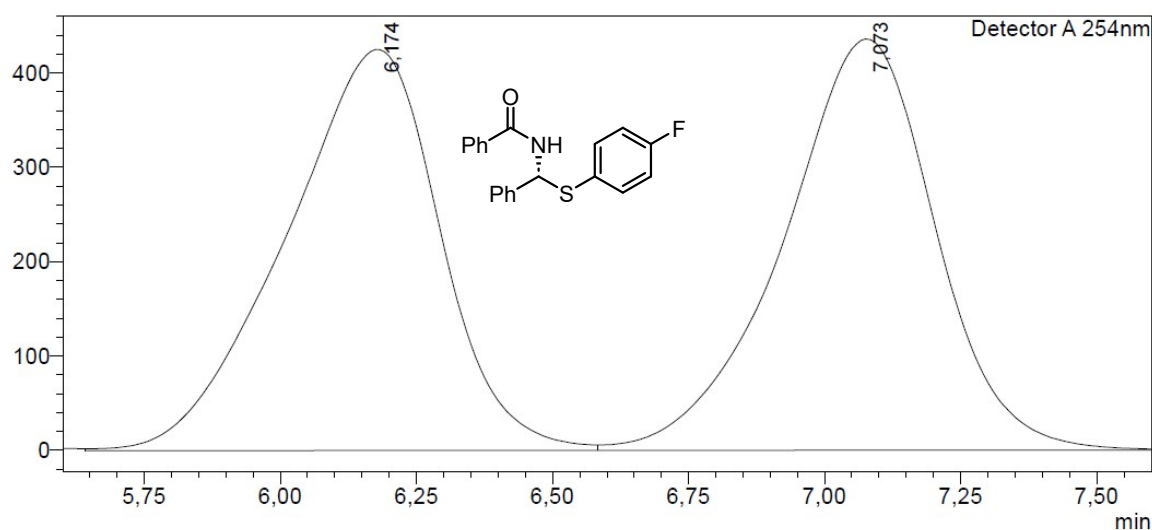

<Peak Table>

Detector A 254nm

| Peak# | Ret. Time | Area     | Height | Conc.  | Unit | Mark | Name |
|-------|-----------|----------|--------|--------|------|------|------|
| 1     | 6,174     | 8389895  | 424969 | 49,760 |      |      |      |
| 2     | 7,073     | 8470984  | 435905 | 50,240 |      | V    |      |
| Total |           | 16860879 | 860874 |        |      |      |      |

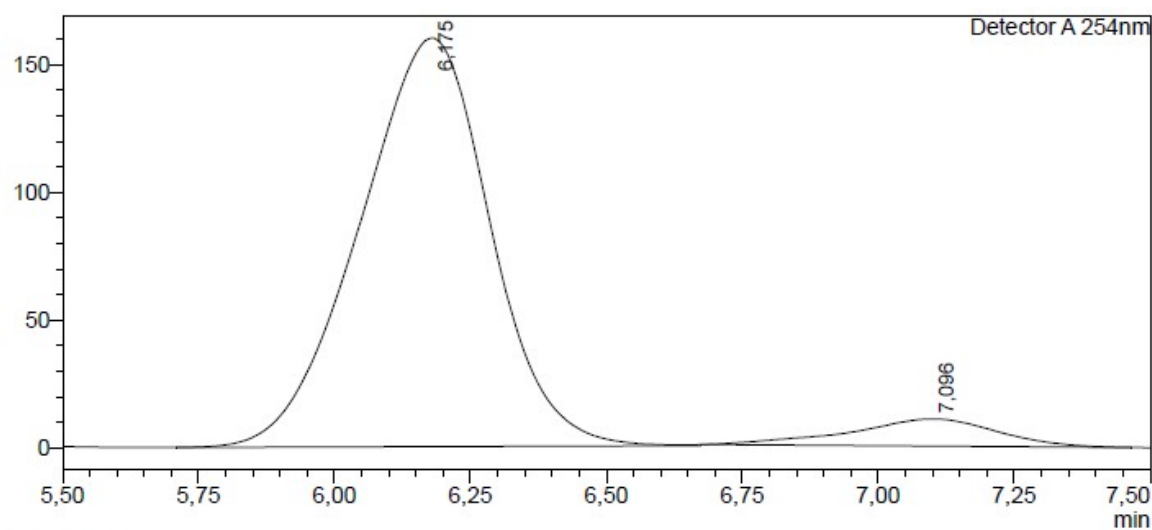

<Peak Table>

Detector A 254nm

| Peak# | Ret. Time | Area    | Height | Conc.  | Unit | Mark | Name |
|-------|-----------|---------|--------|--------|------|------|------|
| 1     | 6,175     | 2669811 | 159766 | 93,033 |      | M    |      |
| 2     | 7,096     | 199935  | 10639  | 6,967  |      | M    |      |
| Total |           | 2869746 | 170405 |        |      |      |      |

(R)-N-(((4-methoxyphenyl)thio)(phenyl)methyl)benzamide (3d)

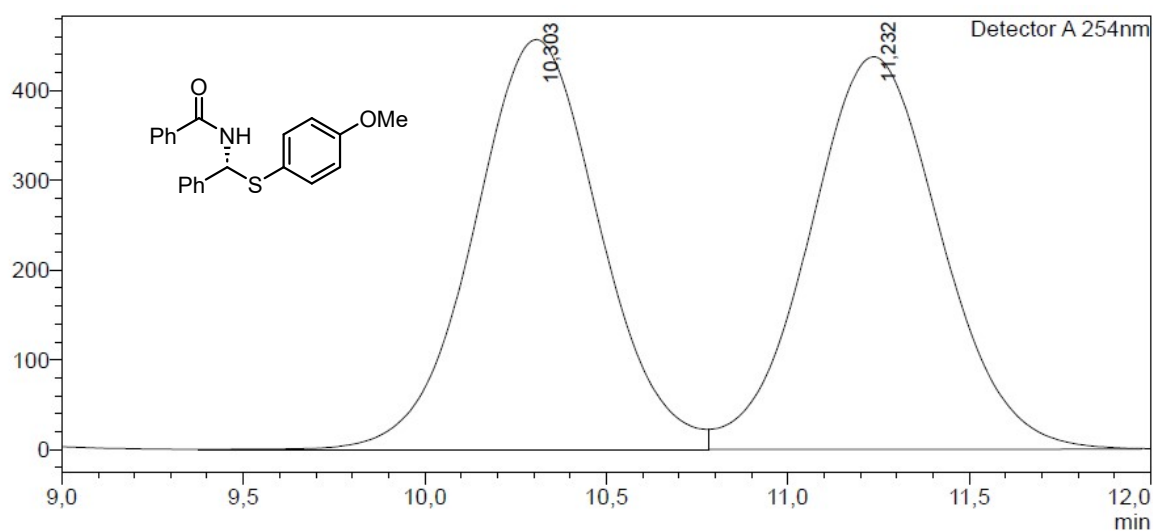

<Peak Table>

Detector A 254nm

| Peak# | Ret. Time | Area     | Height | Conc.  | Unit | Mark | Name |
|-------|-----------|----------|--------|--------|------|------|------|
| 1     | 10,303    | 11024352 | 456603 | 49,963 |      |      |      |
| 2     | 11,232    | 11040687 | 437245 | 50,037 |      | V M  |      |
| Total |           | 22065039 | 893848 |        |      |      |      |

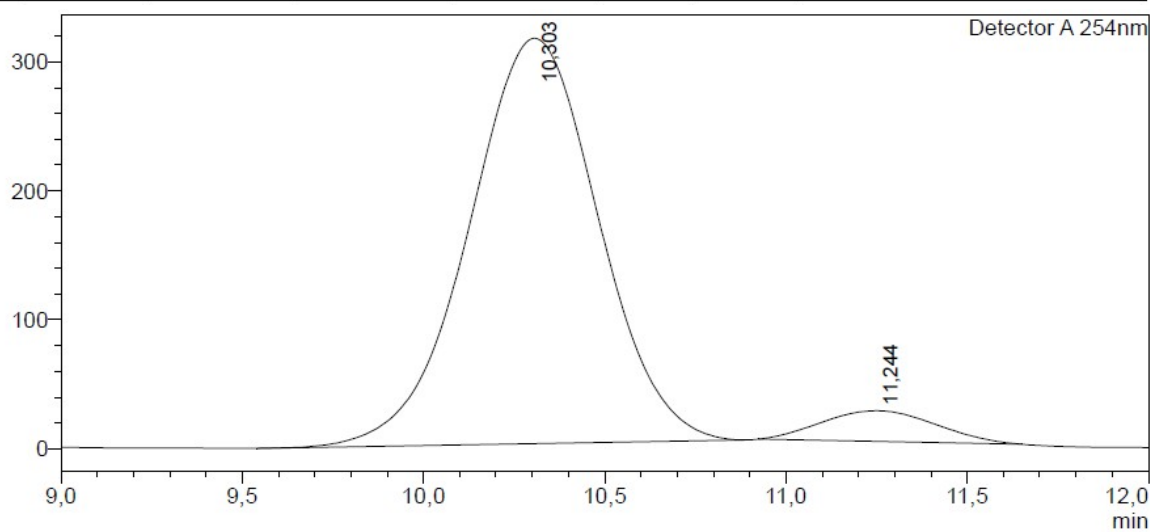

<Peak Table>

Detector A 254nm

| Peak# | Ret. Time | Area    | Height | Conc.  | Unit | Mark | Name |
|-------|-----------|---------|--------|--------|------|------|------|
| 1     | 10,303    | 7774044 | 314159 | 93,741 |      | M    |      |
| 2     | 11,244    | 519059  | 23768  | 6,259  |      | M    |      |
| Total |           | 8293102 | 337927 |        |      |      |      |

(R)-N-(((2-chlorophenyl)thio)(phenyl)methyl)benzamide (3e)

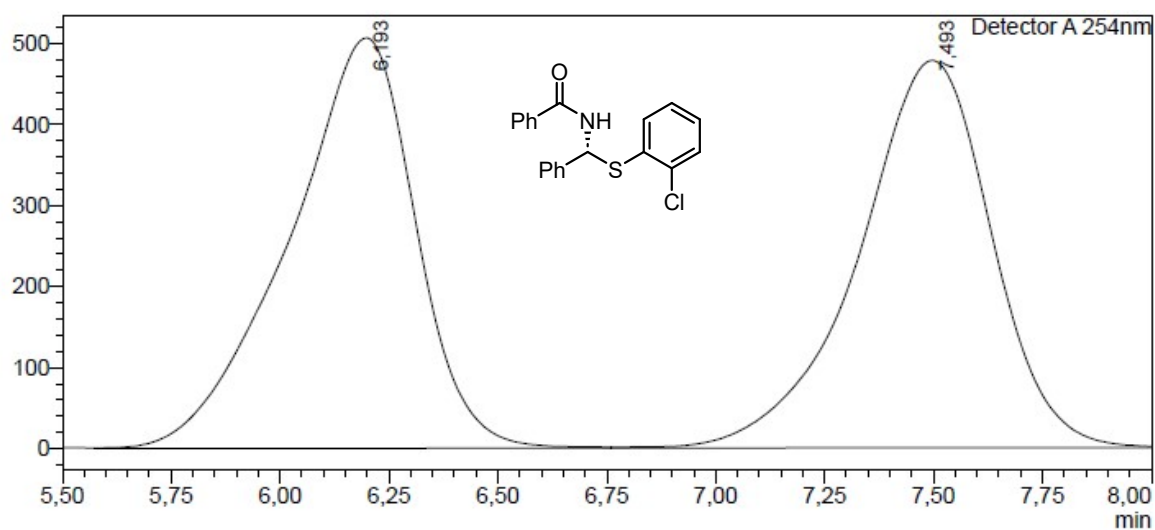

<Peak Table>

Detector A 254nm

| Peak# | Ret. Time | Area     | Height | Conc.  | Unit | Mark | Name |
|-------|-----------|----------|--------|--------|------|------|------|
| 1     | 6,193     | 10233871 | 506858 | 50,211 |      |      |      |
| 2     | 7,493     | 10147873 | 478380 | 49,789 |      | V    |      |
| Total |           | 20381744 | 985238 |        |      |      |      |

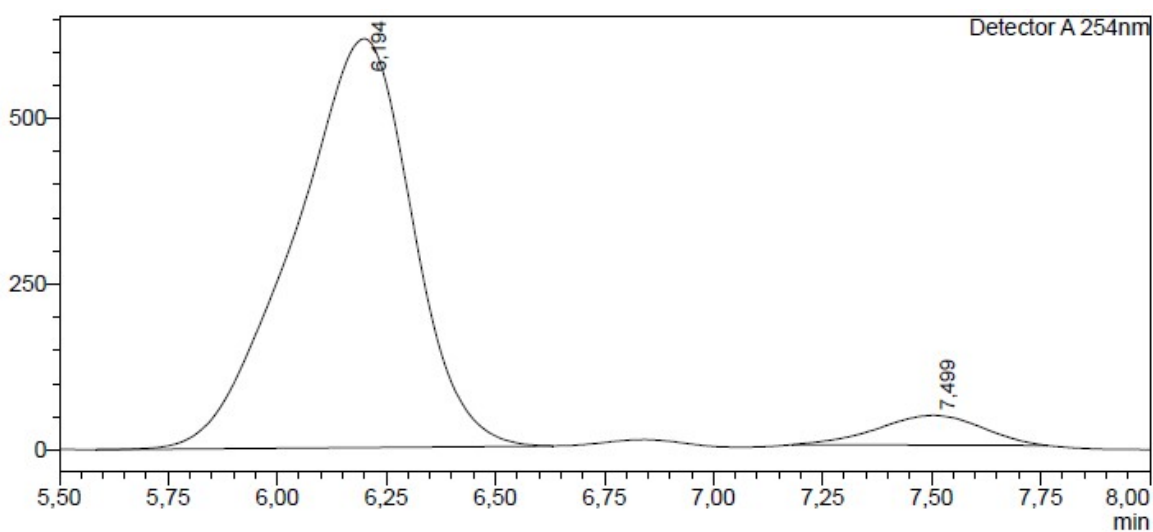

<Peak Table>

Detector A 254nm

| Peak# | Ret. Time | Area     | Height | Conc.  | Unit | Mark | Name |
|-------|-----------|----------|--------|--------|------|------|------|
| 1     | 6,194     | 11577198 | 615978 | 93,945 |      | M    |      |
| 2     | 7,499     | 746155   | 44602  | 6,055  |      | M    |      |
| Total |           | 12323353 | 660580 |        |      |      |      |

(R)-N-(((2,4-dimethylphenyl)thio)(phenyl)methyl)benzamide (3f)

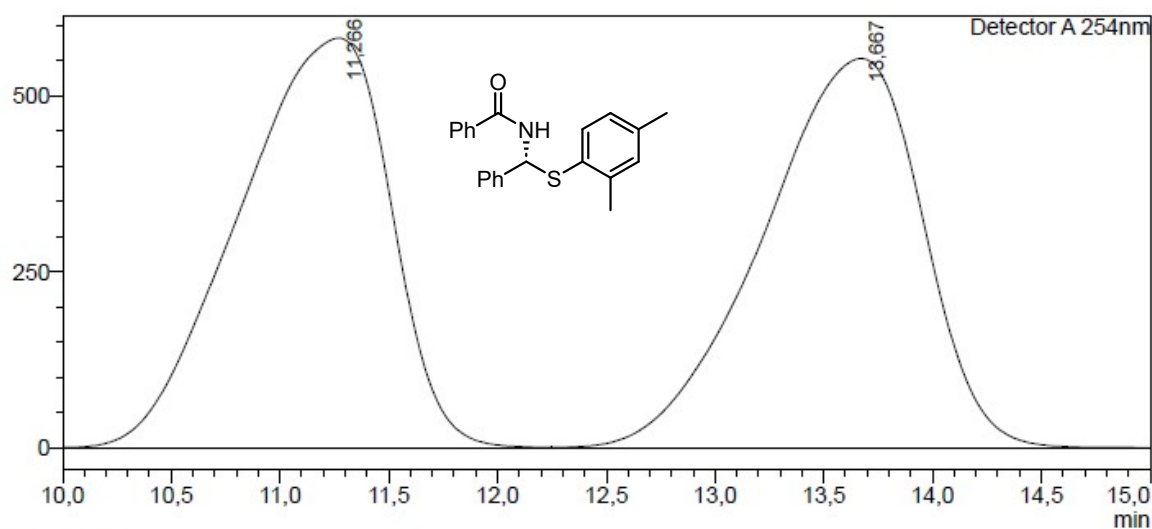

<Peak Table>

Detector A 254nm

| Peak# | Ret. Time | Area     | Height  | Conc.  | Unit | Mark | Name |
|-------|-----------|----------|---------|--------|------|------|------|
| 1     | 11,266    | 28331342 | 581766  | 49,973 |      |      |      |
| 2     | 13,667    | 28361391 | 552847  | 50,027 |      | V    |      |
| Total |           | 56692733 | 1134613 |        |      |      |      |

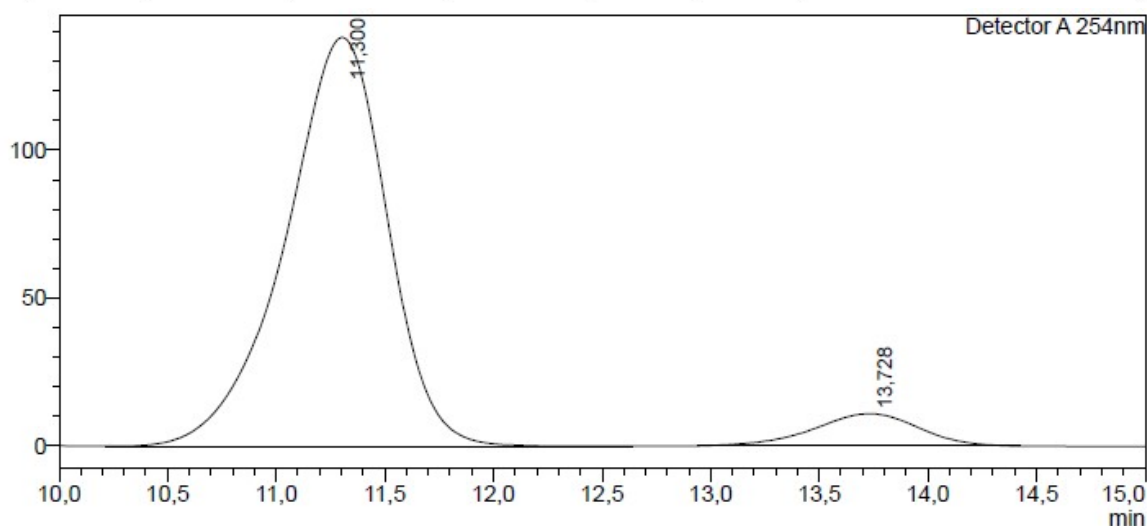

<Peak Table>

Detector A 254nm

| Peak# | Ret. Time | Area    | Height | Conc.  | Unit | Mark | Name |
|-------|-----------|---------|--------|--------|------|------|------|
| 1     | 11,300    | 4516232 | 138156 | 92,512 |      | M    |      |
| 2     | 13,728    | 365554  | 10887  | 7,488  |      | M    |      |
| Total |           | 4881786 | 149043 |        |      |      |      |

(R)-N-(((4-methoxybenzyl)thio)(phenyl)methyl)benzamide (3g)

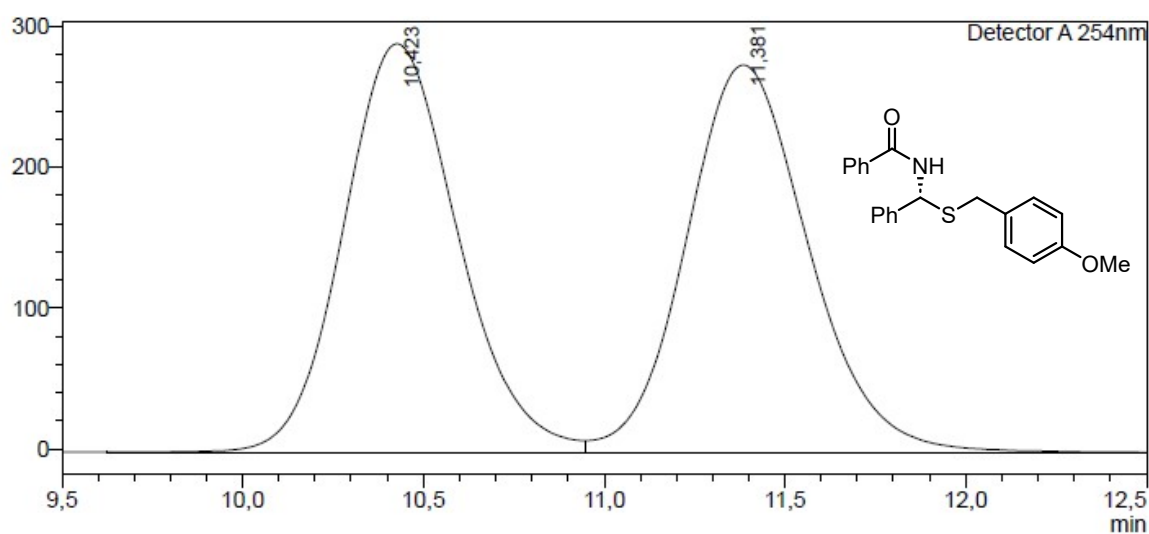

<Peak Table>

Detector A 254nm

| Peak# | Ret. Time | Area     | Height | Conc.  | Unit | Mark | Name |
|-------|-----------|----------|--------|--------|------|------|------|
| 1     | 10,423    | 6416199  | 289999 | 49,606 |      |      |      |
| 2     | 11,381    | 6518118  | 275063 | 50,394 |      | V M  |      |
| Total |           | 12934317 | 565062 |        |      |      |      |

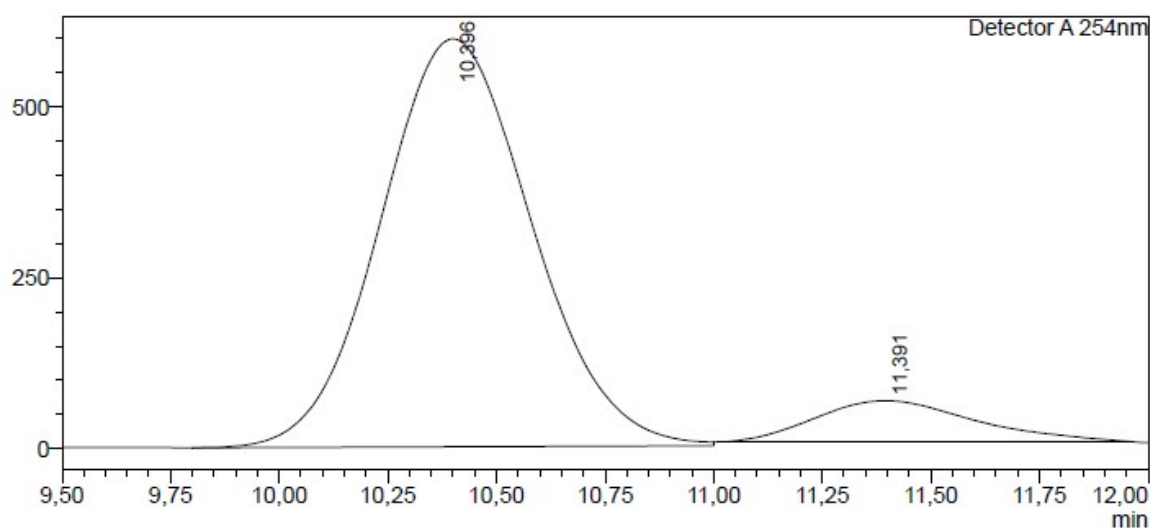

<Peak Table>

Detector A 254nm

| Peak# | Ret. Time | Area     | Height | Conc.  | Unit | Mark | Name |
|-------|-----------|----------|--------|--------|------|------|------|
| 1     | 10,396    | 14426387 | 596827 | 90,442 |      |      |      |
| 2     | 11,391    | 1524634  | 60082  | 9,558  |      | M    |      |
| Total |           | 15951021 | 656908 |        |      |      |      |

(R)-N-(((4-fluorobenzyl)thio)(phenyl)methyl)benzamide (3h)

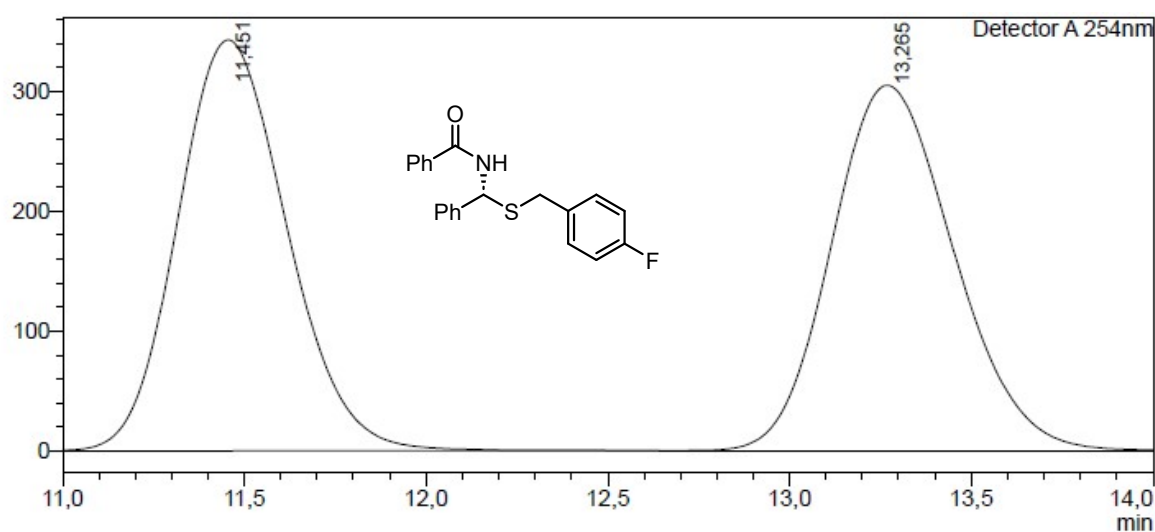

<Peak Table>

Detector A 254nm

| Peak# | Ret. Time | Area     | Height | Conc.  | Unit | Mark | Name |
|-------|-----------|----------|--------|--------|------|------|------|
| 1     | 11,451    | 7171417  | 342332 | 50,134 |      |      |      |
| 2     | 13,265    | 7133095  | 304516 | 49,866 |      | V    |      |
| Total |           | 14304512 | 646848 |        |      |      |      |

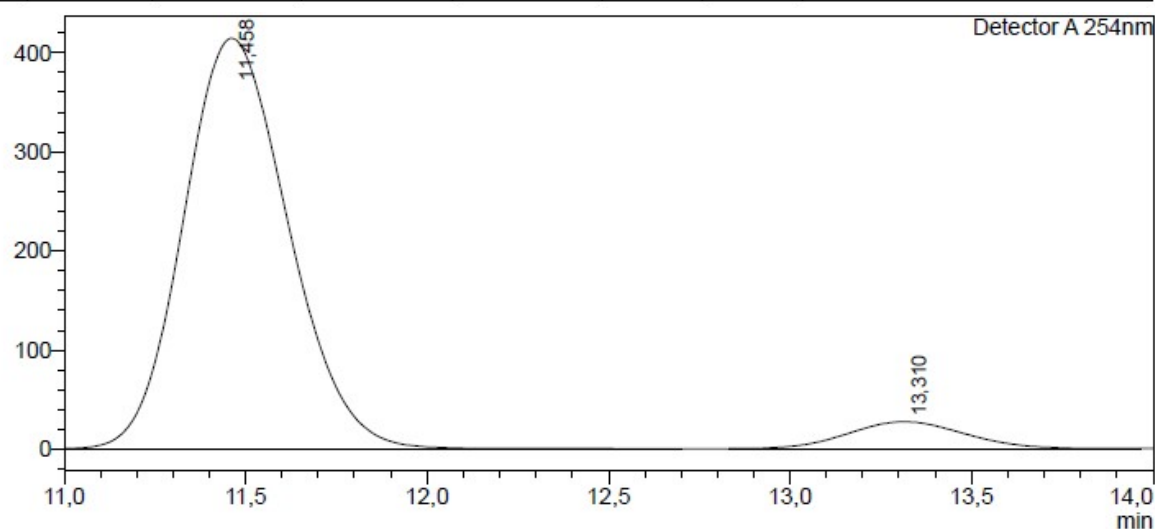

<Peak Table>

Detector A 254nm

| Peak# | Ret. Time | Area    | Height | Conc.  | Unit | Mark | Name |
|-------|-----------|---------|--------|--------|------|------|------|
| 1     | 11,458    | 8322735 | 414220 | 93,186 |      |      |      |
| 2     | 13,310    | 608601  | 27156  | 6,814  |      | M    |      |
| Total |           | 8931336 | 441376 |        |      |      |      |

(R)-2-((benzamido(phenyl)methyl)thio)acetic acid (3i)

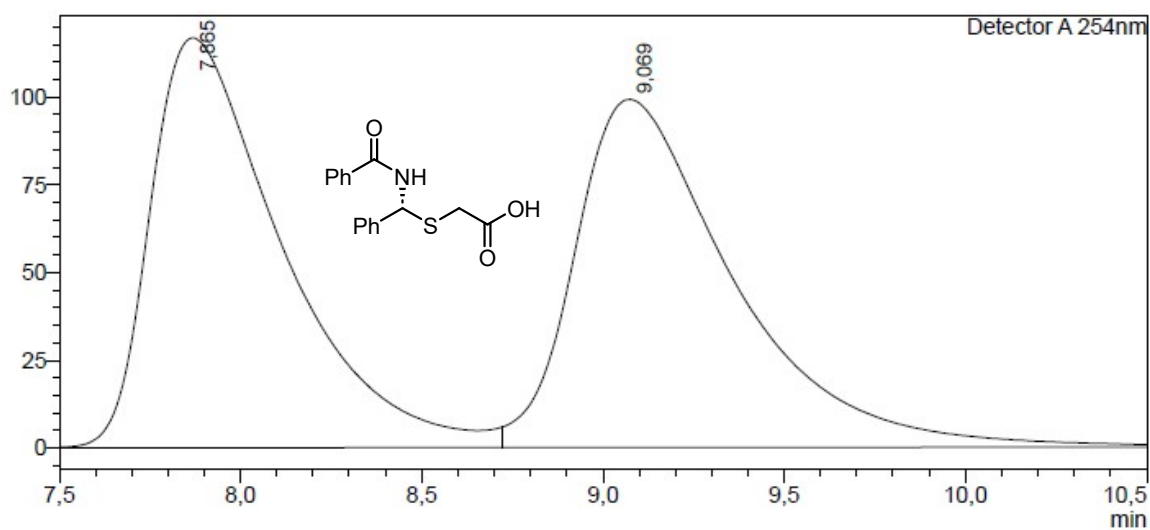

<Peak Table>

Detector A 254nm

| Peak# | Ret. Time | Area    | Height | Conc.  | Unit | Mark | Name |
|-------|-----------|---------|--------|--------|------|------|------|
| 1     | 7,865     | 2954853 | 116736 | 49,331 |      | M    |      |
| 2     | 9,069     | 3035033 | 99167  | 50,669 |      | V M  |      |
| Total |           | 5989885 | 215903 |        |      |      |      |

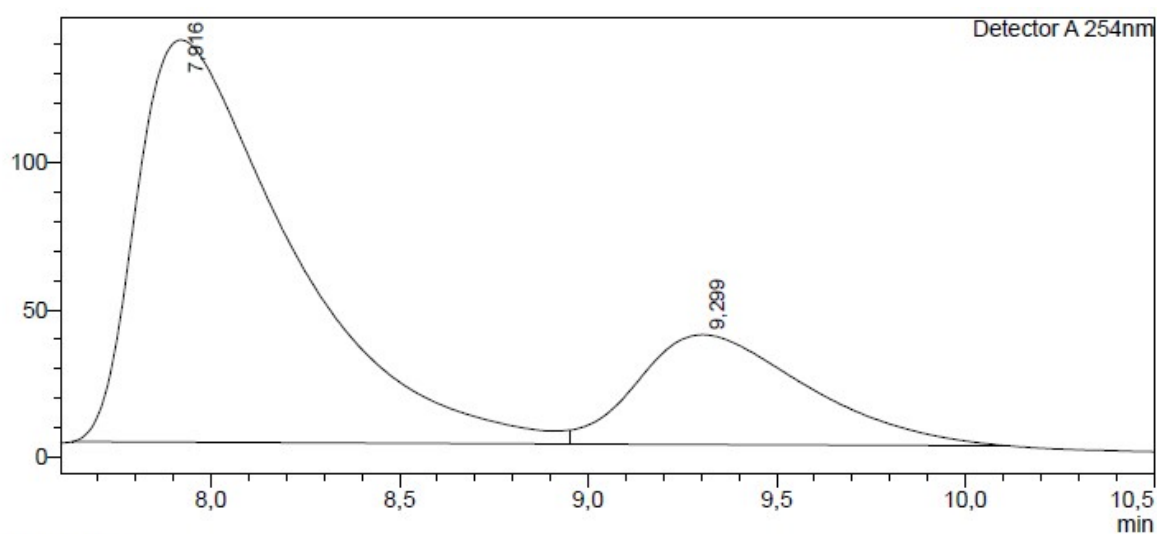

<Peak Table>

Detector A 254nm

| Peak# | Ret. Time | Area    | Height | Conc.  | Unit | Mark | Name |
|-------|-----------|---------|--------|--------|------|------|------|
| 1     | 7,916     | 3892716 | 136383 | 76,930 |      | M    |      |
| 2     | 9,299     | 1167370 | 37213  | 23,070 |      | V M  |      |
| Total |           | 5060086 | 173596 |        |      |      |      |

methyl (*R*)-2-((benzamido(phenyl)methyl)thio)acetate (3j)

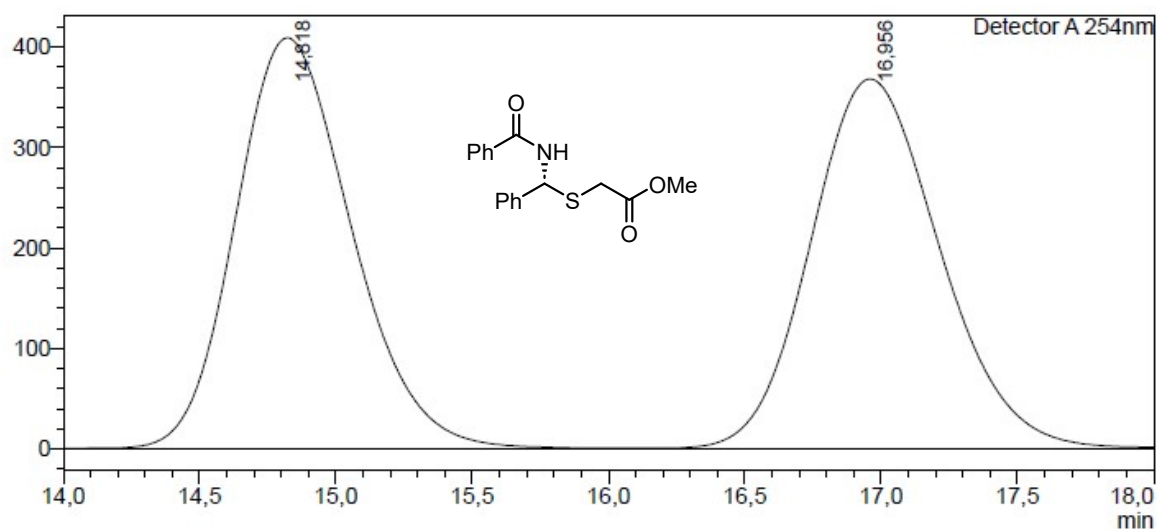

# <Peak Table>

Detector A 254nm

| Peak# | Ret. Time | Area     | Height | Conc.  | Unit | Mark | Name |
|-------|-----------|----------|--------|--------|------|------|------|
| 1     | 14,818    | 12141650 | 409018 | 49,954 |      |      |      |
| 2     | 16,956    | 12163777 | 368084 | 50,046 |      | V    |      |
| Total |           | 24305426 | 777102 |        |      |      |      |

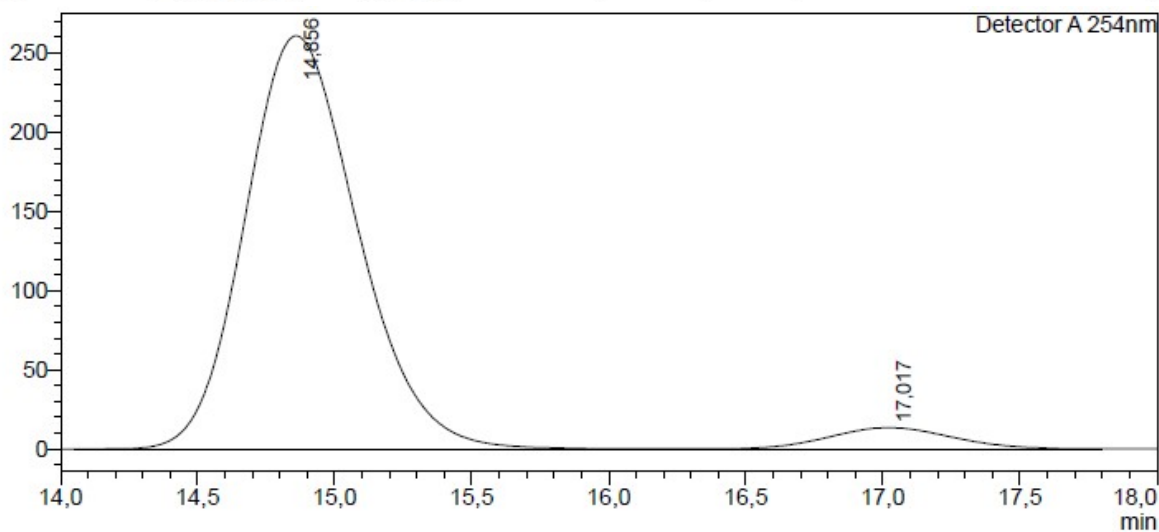

# <Peak Table>

Detector A 254nm

| Peak# | Ret. Time | Area    | Height | Conc.  | Unit | Mark | Name |
|-------|-----------|---------|--------|--------|------|------|------|
| 1     | 14,856    | 7460528 | 260853 | 94,531 |      |      |      |
| 2     | 17,017    | 431624  | 13531  | 5,469  |      | V    |      |
| Total |           | 7892152 | 274384 |        |      |      |      |

NMR spectra of **3**<sup>1</sup>

(*R*)-*N*-(phenyl(phenylthio)methyl)benzamide (**3a**) (CDCl<sub>3</sub>, <sup>1</sup>H 300 MHz, <sup>13</sup>C 75 MHz)

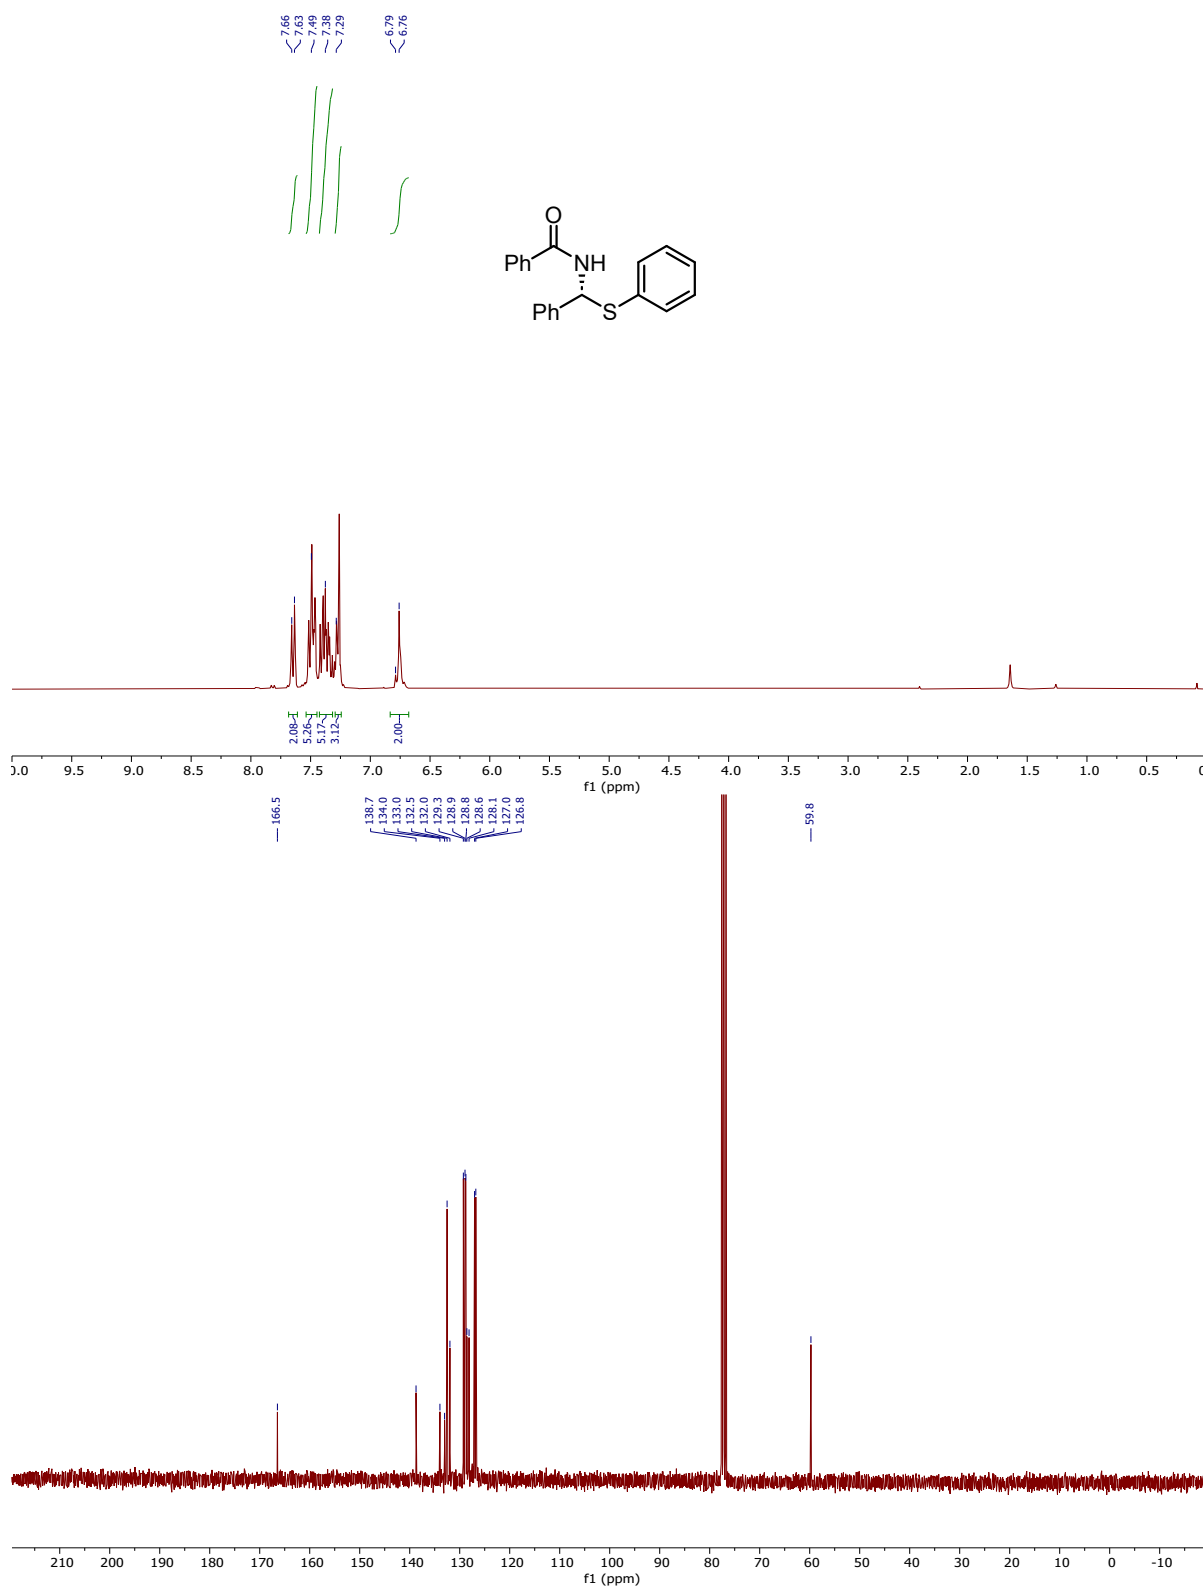

(*R*)-*N*-(phenyl(*p*-tolylthio)methyl)benzamide (**3b**) (CDCl<sub>3</sub>, <sup>1</sup>H 300 MHz, <sup>13</sup>C 75 MHz)

<sup>1</sup> All the NMR spectra correspond to the crude products after simple filtration. No additional crystallization or chromatography was performed.

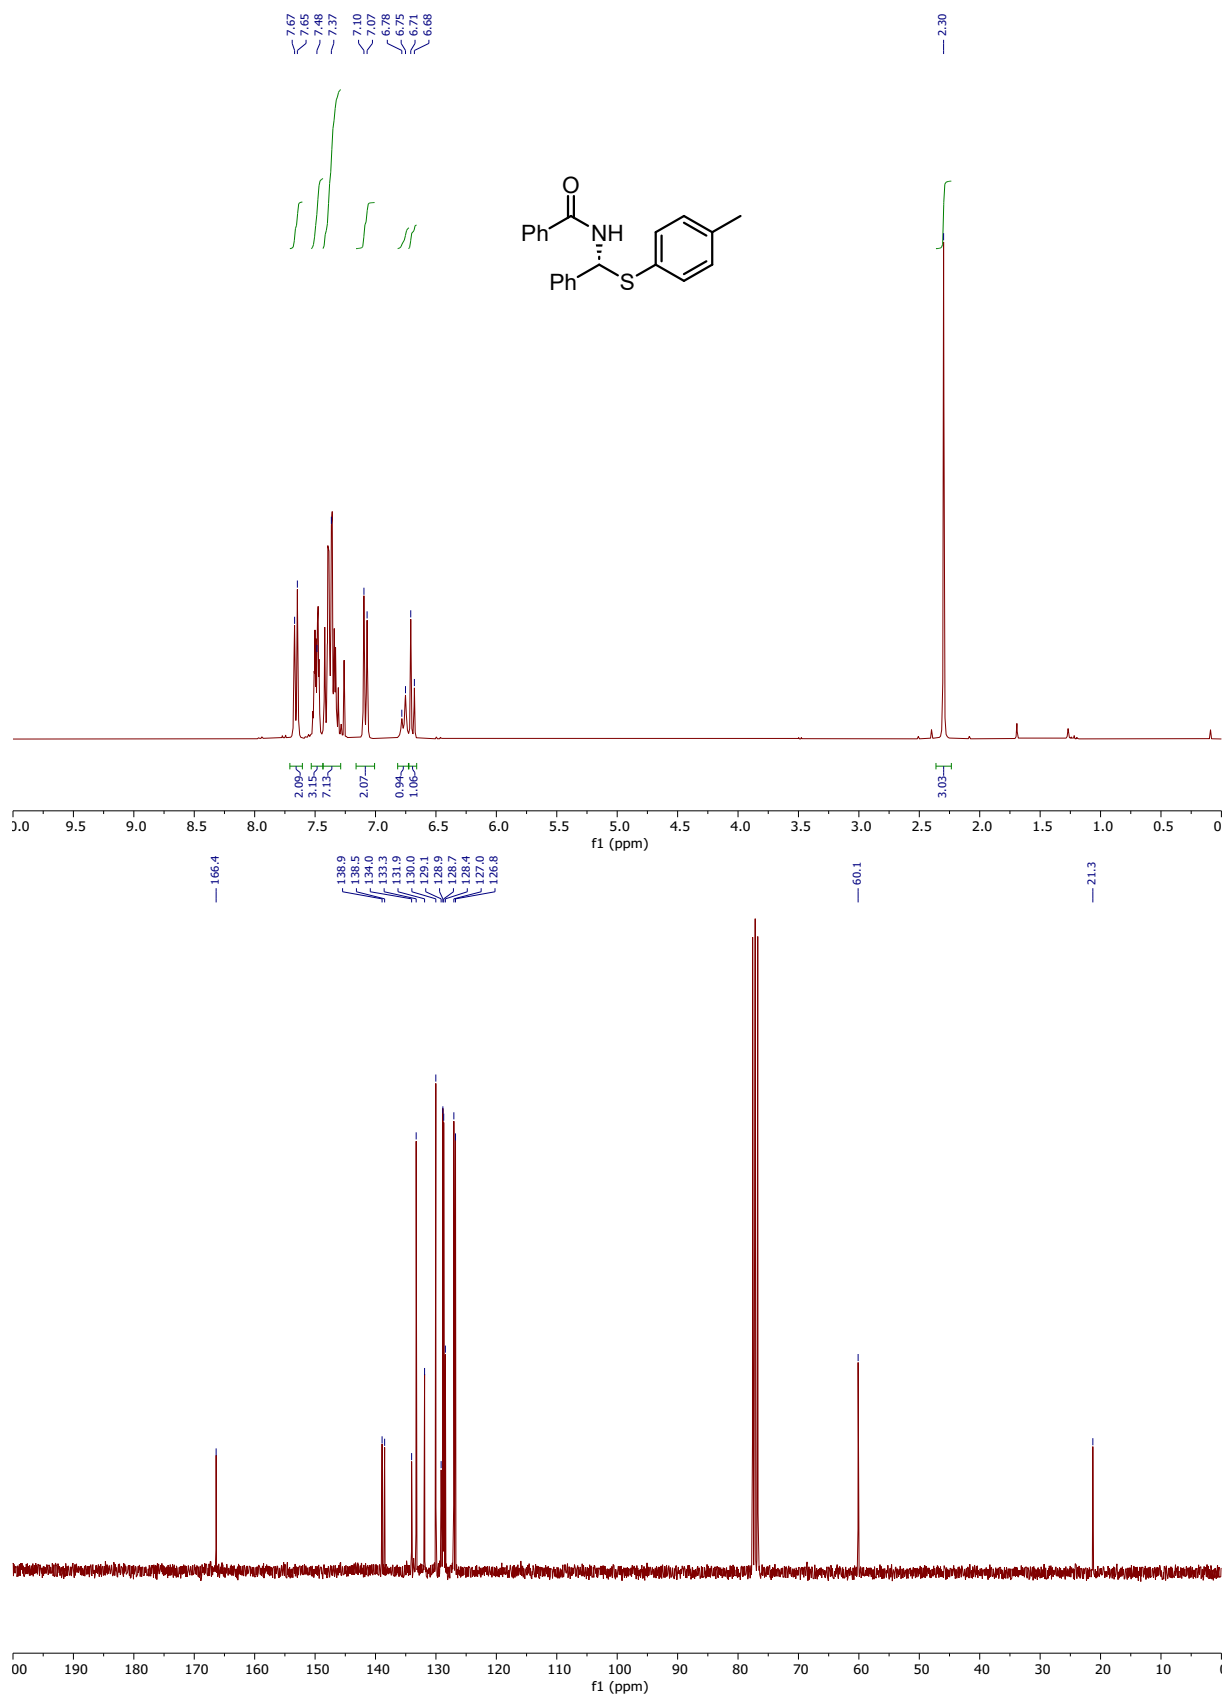

(*R*)-*N*-(((4-fluorophenyl)thio)(phenyl)methyl)benzamide (3c) (CDCl<sub>3</sub>, <sup>1</sup>H 300 MHz, <sup>13</sup>C 75 MHz, <sup>19</sup>F 282 MHz)

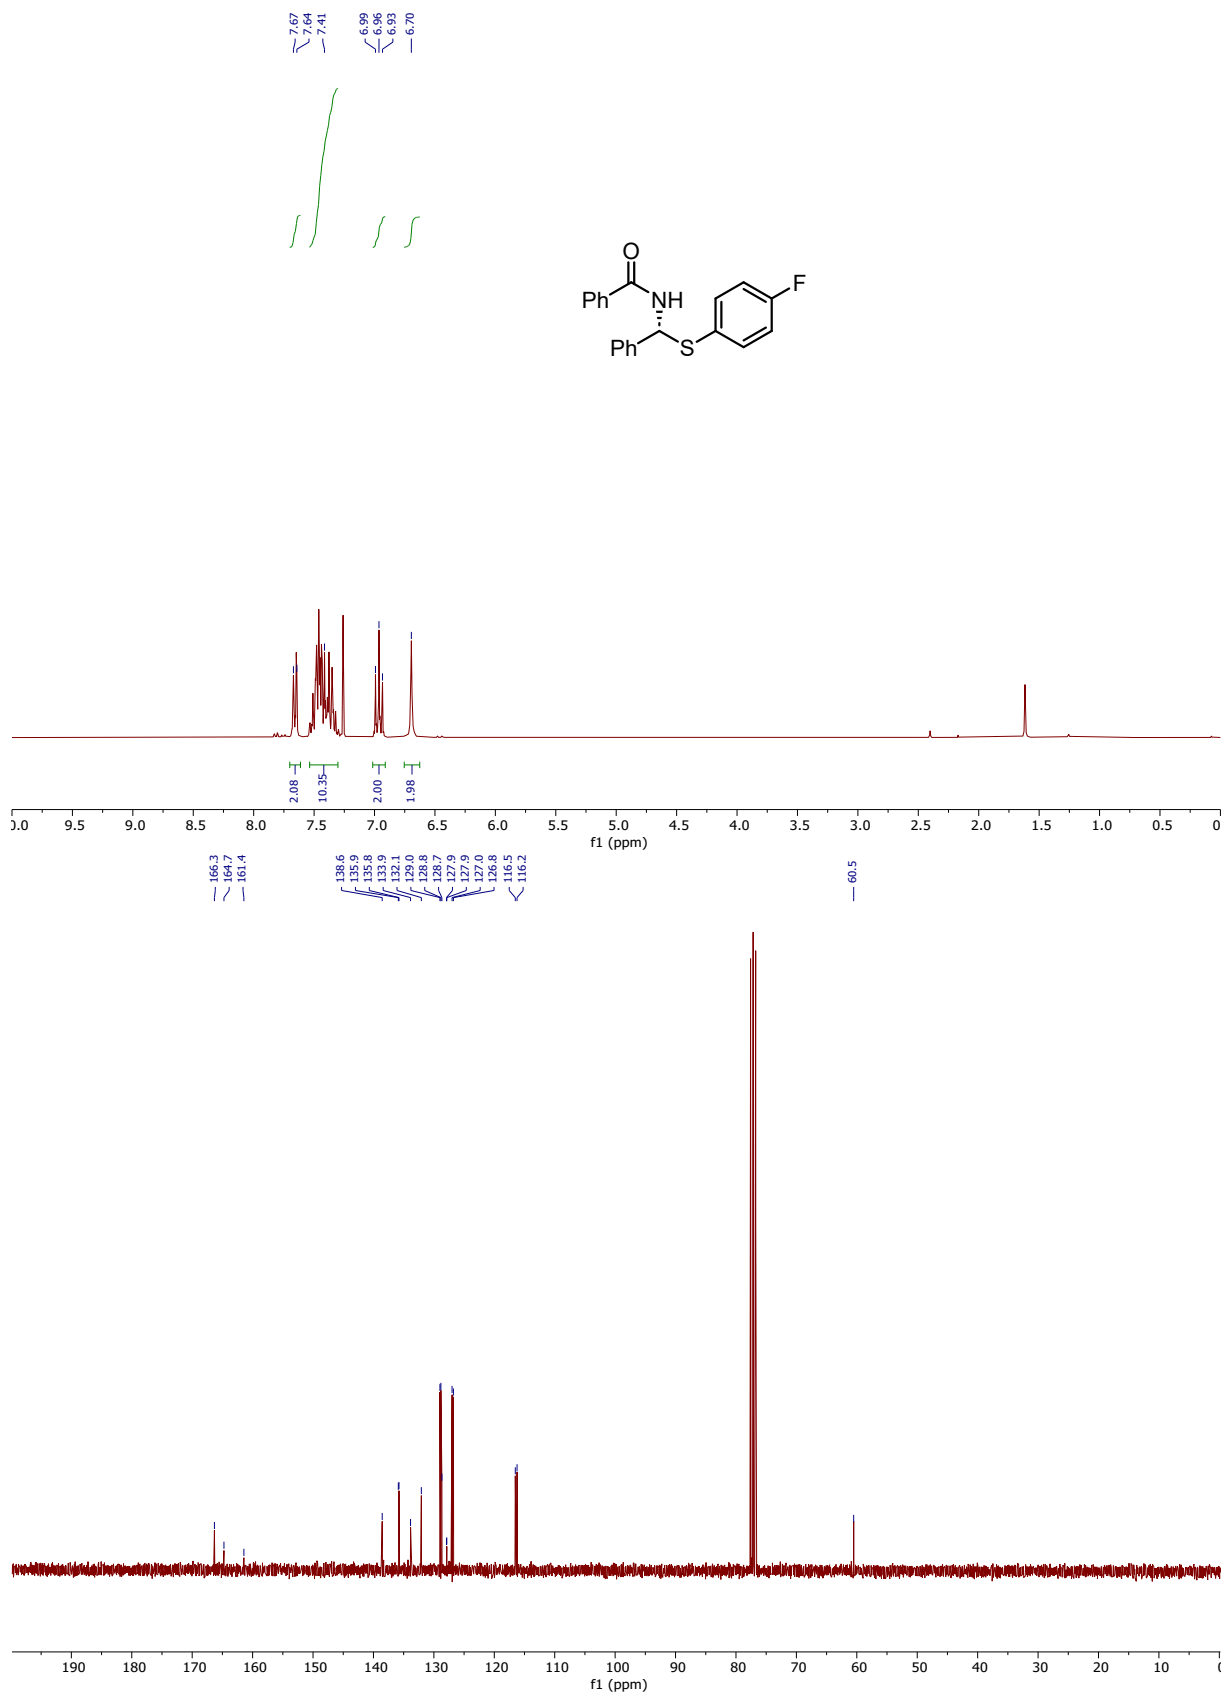

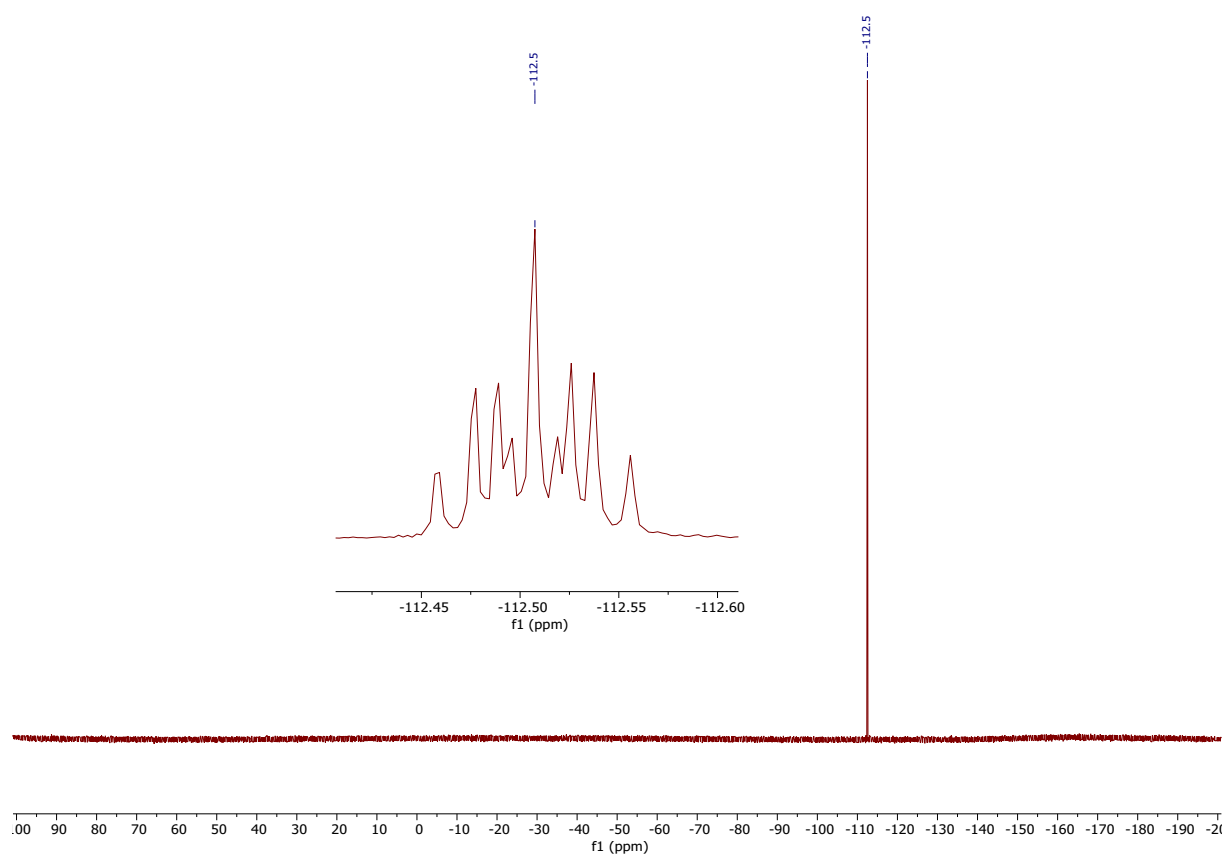

(*R*)-N-(((4-methoxyphenyl)thio)(phenyl)methyl)benzamide (3d) (CDCl<sub>3</sub>, <sup>1</sup>H 300 MHz, <sup>13</sup>C 75 MHz)

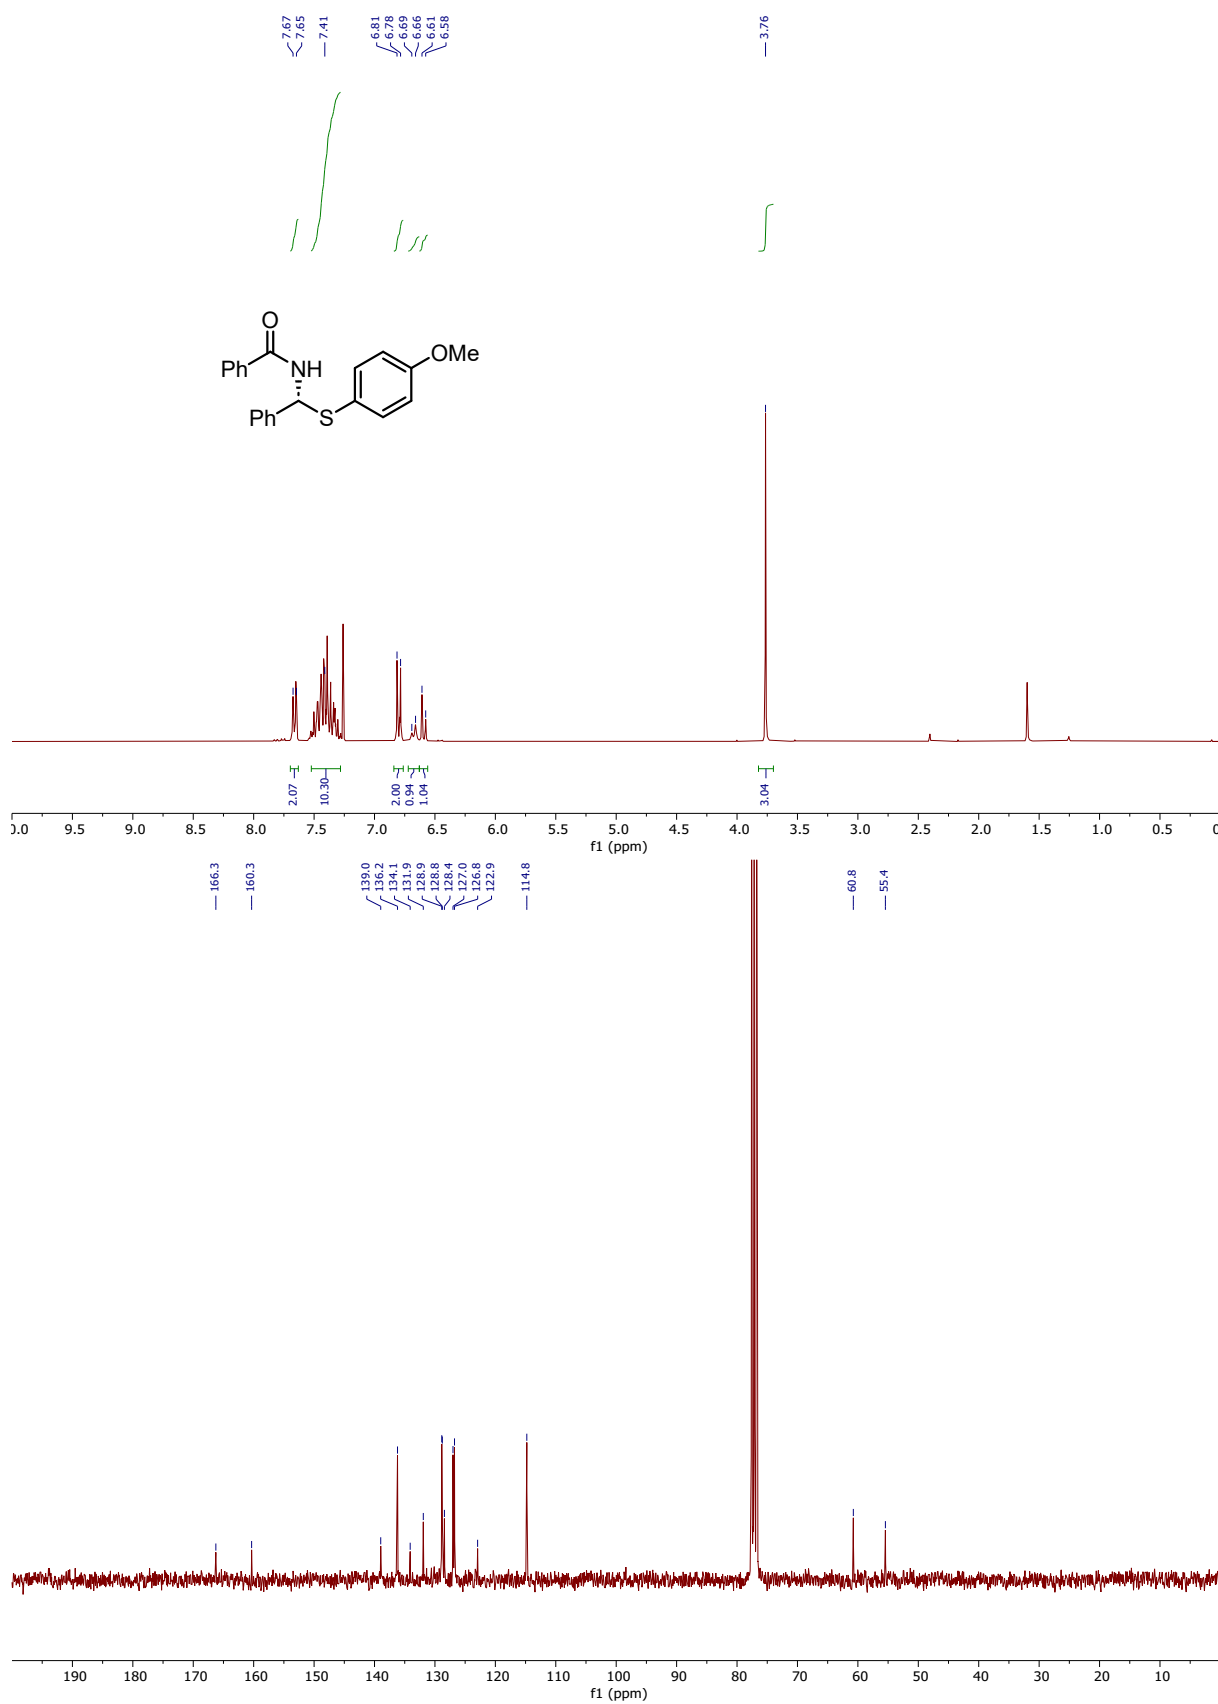

(*R*)-*N*-(((2-chlorophenyl)thio)(phenyl)methyl)benzamide (3e) (CDCl<sub>3</sub>, <sup>1</sup>H 300 MHz, <sup>13</sup>C 75 MHz)

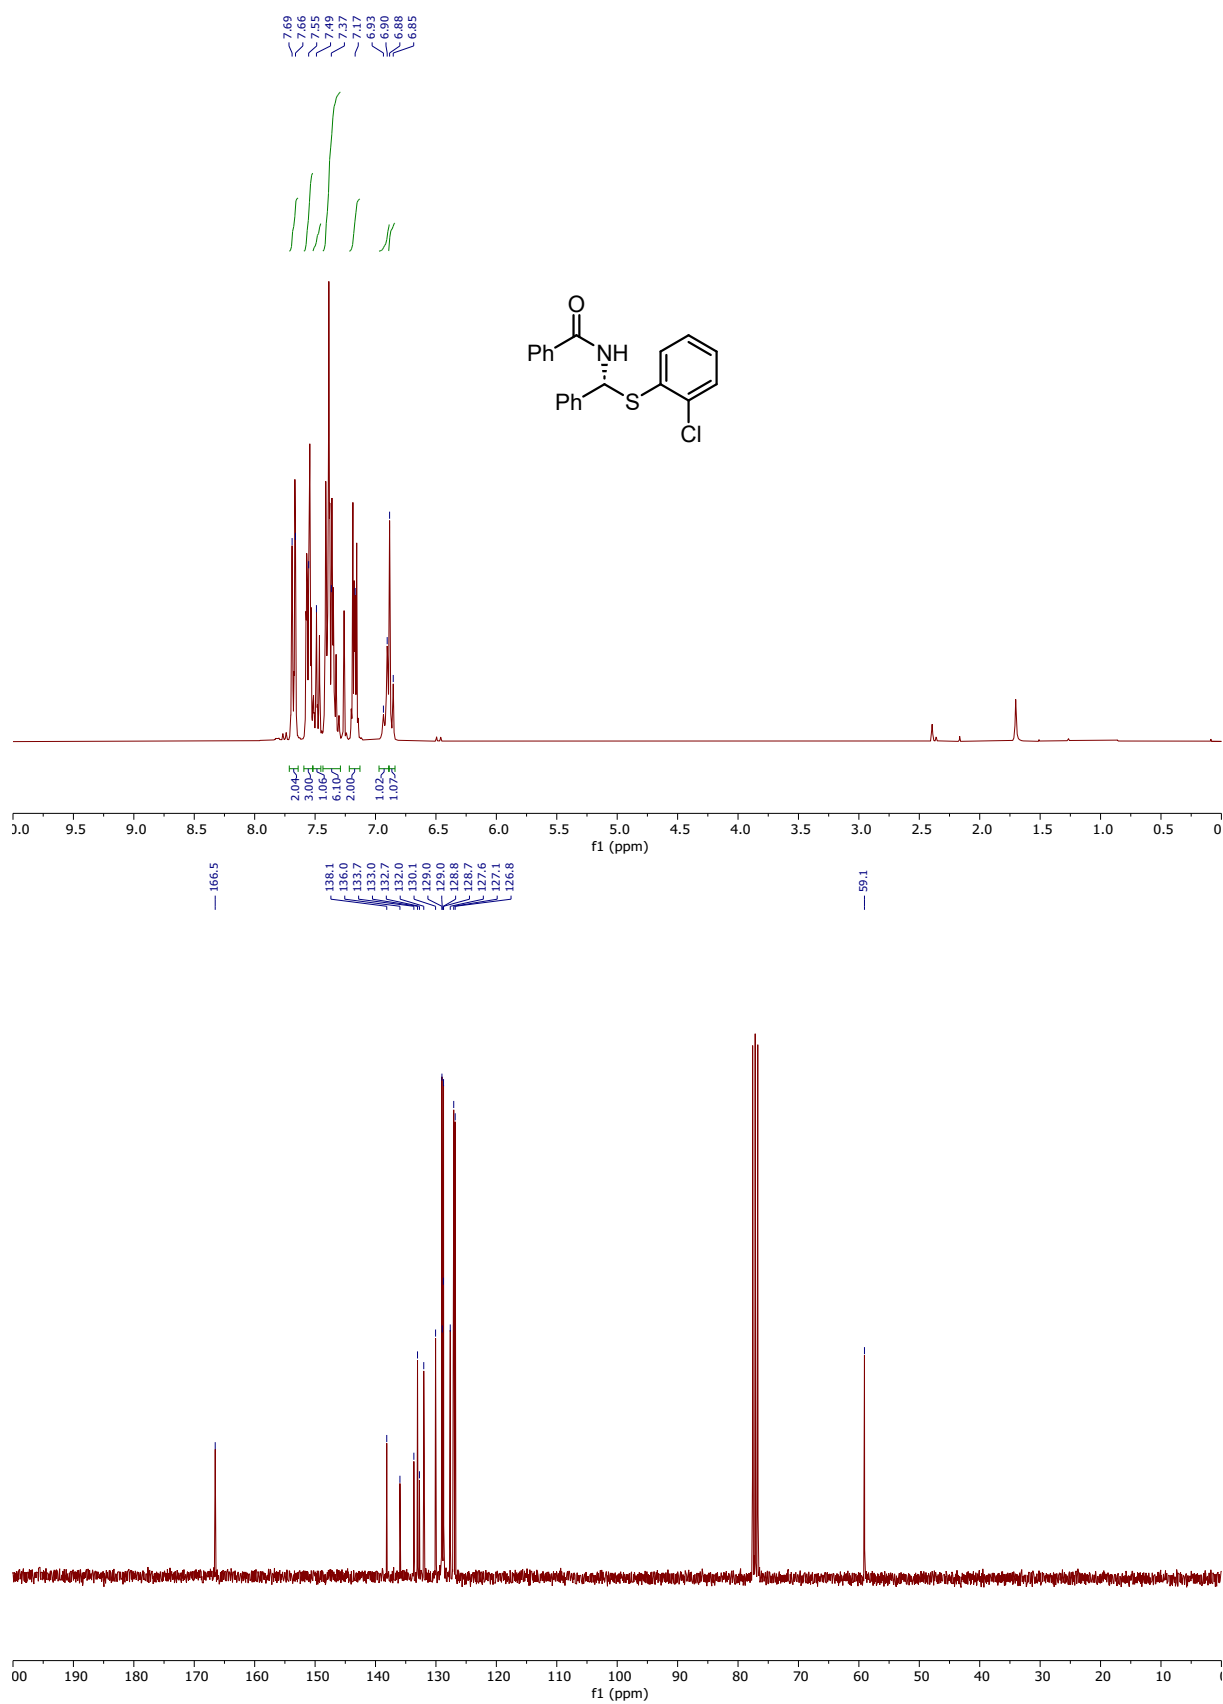

(*R*)-*N*-(((2,4-dimethylphenyl)thio)(phenyl)methyl)benzamide (3f) (CDCl<sub>3</sub>, <sup>1</sup>H 300 MHz, <sup>13</sup>C 75 MHz)

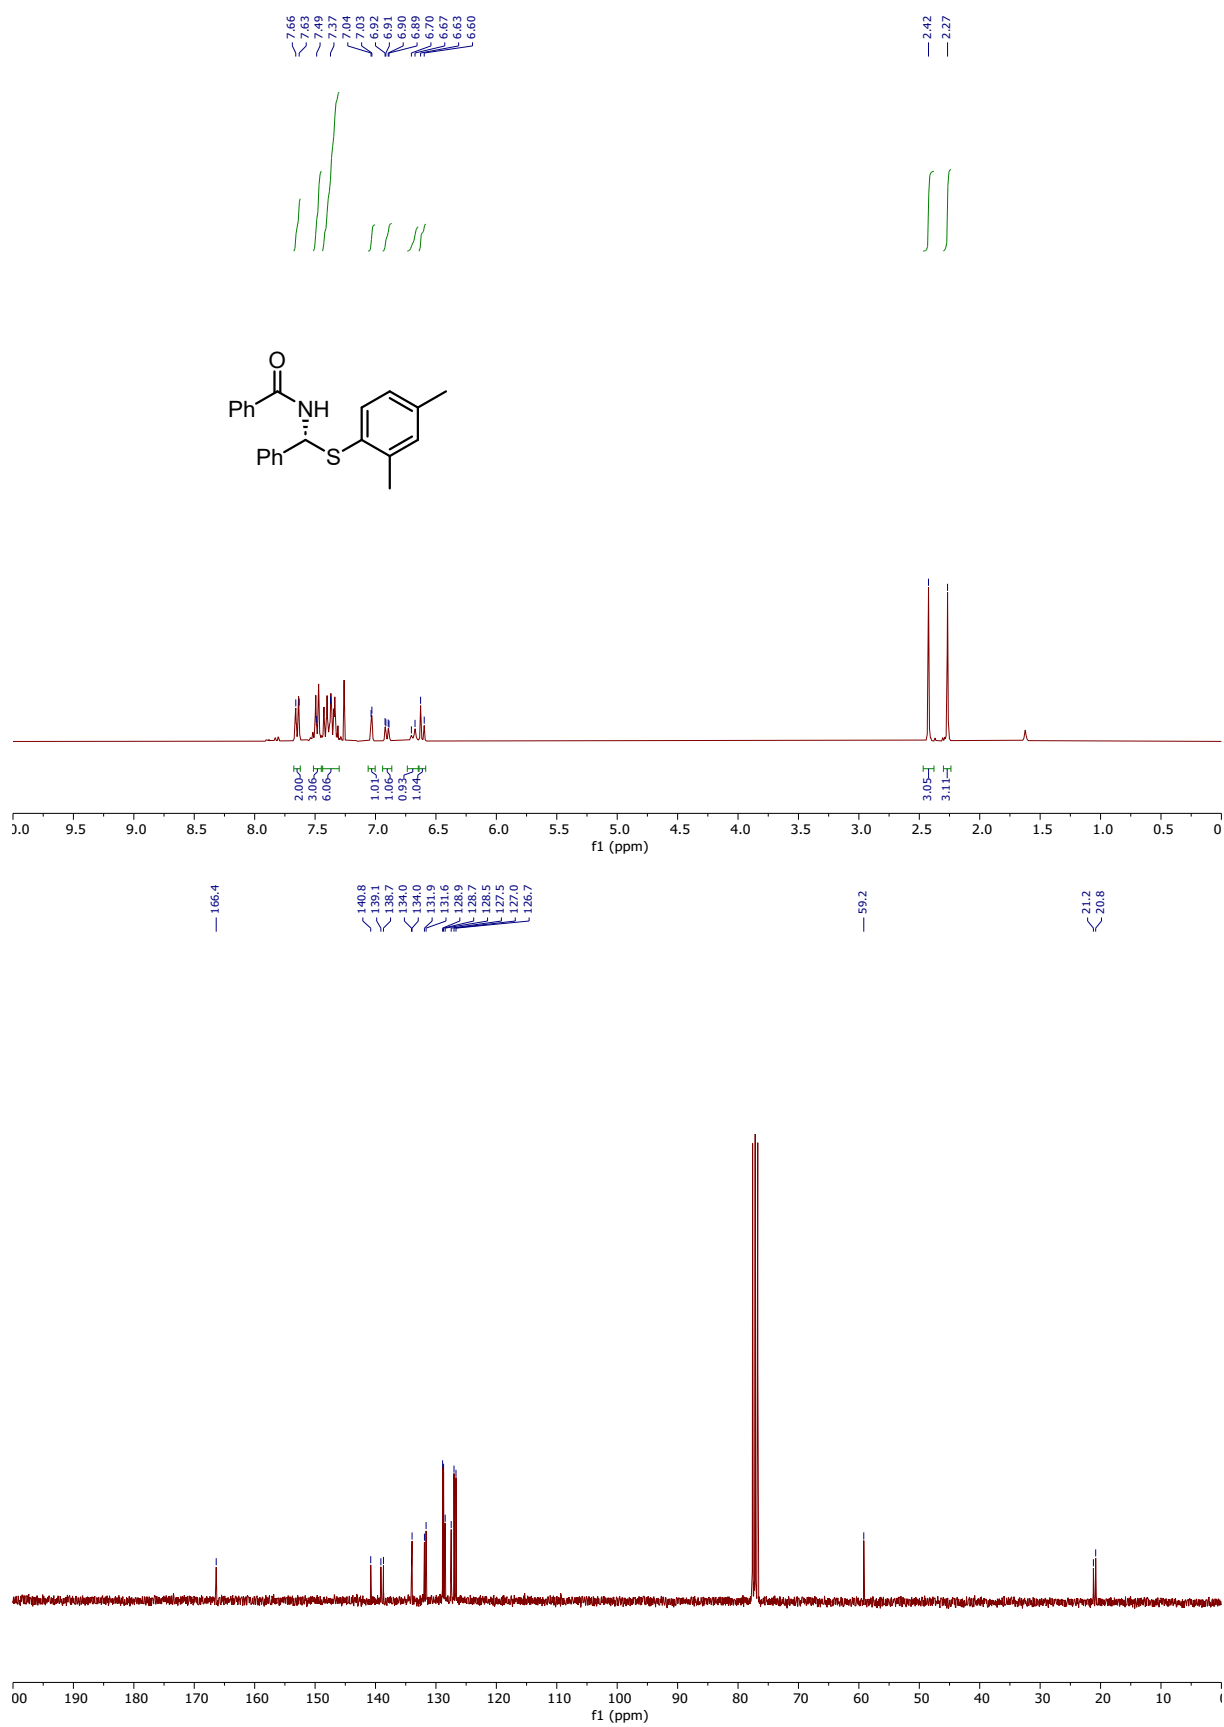

(*R*)-*N*-(((4-methoxybenzyl)thio)(phenyl)methyl)benzamide (3g) (CDCl<sub>3</sub>, <sup>1</sup>H 300 MHz, <sup>13</sup>C 75 MHz)

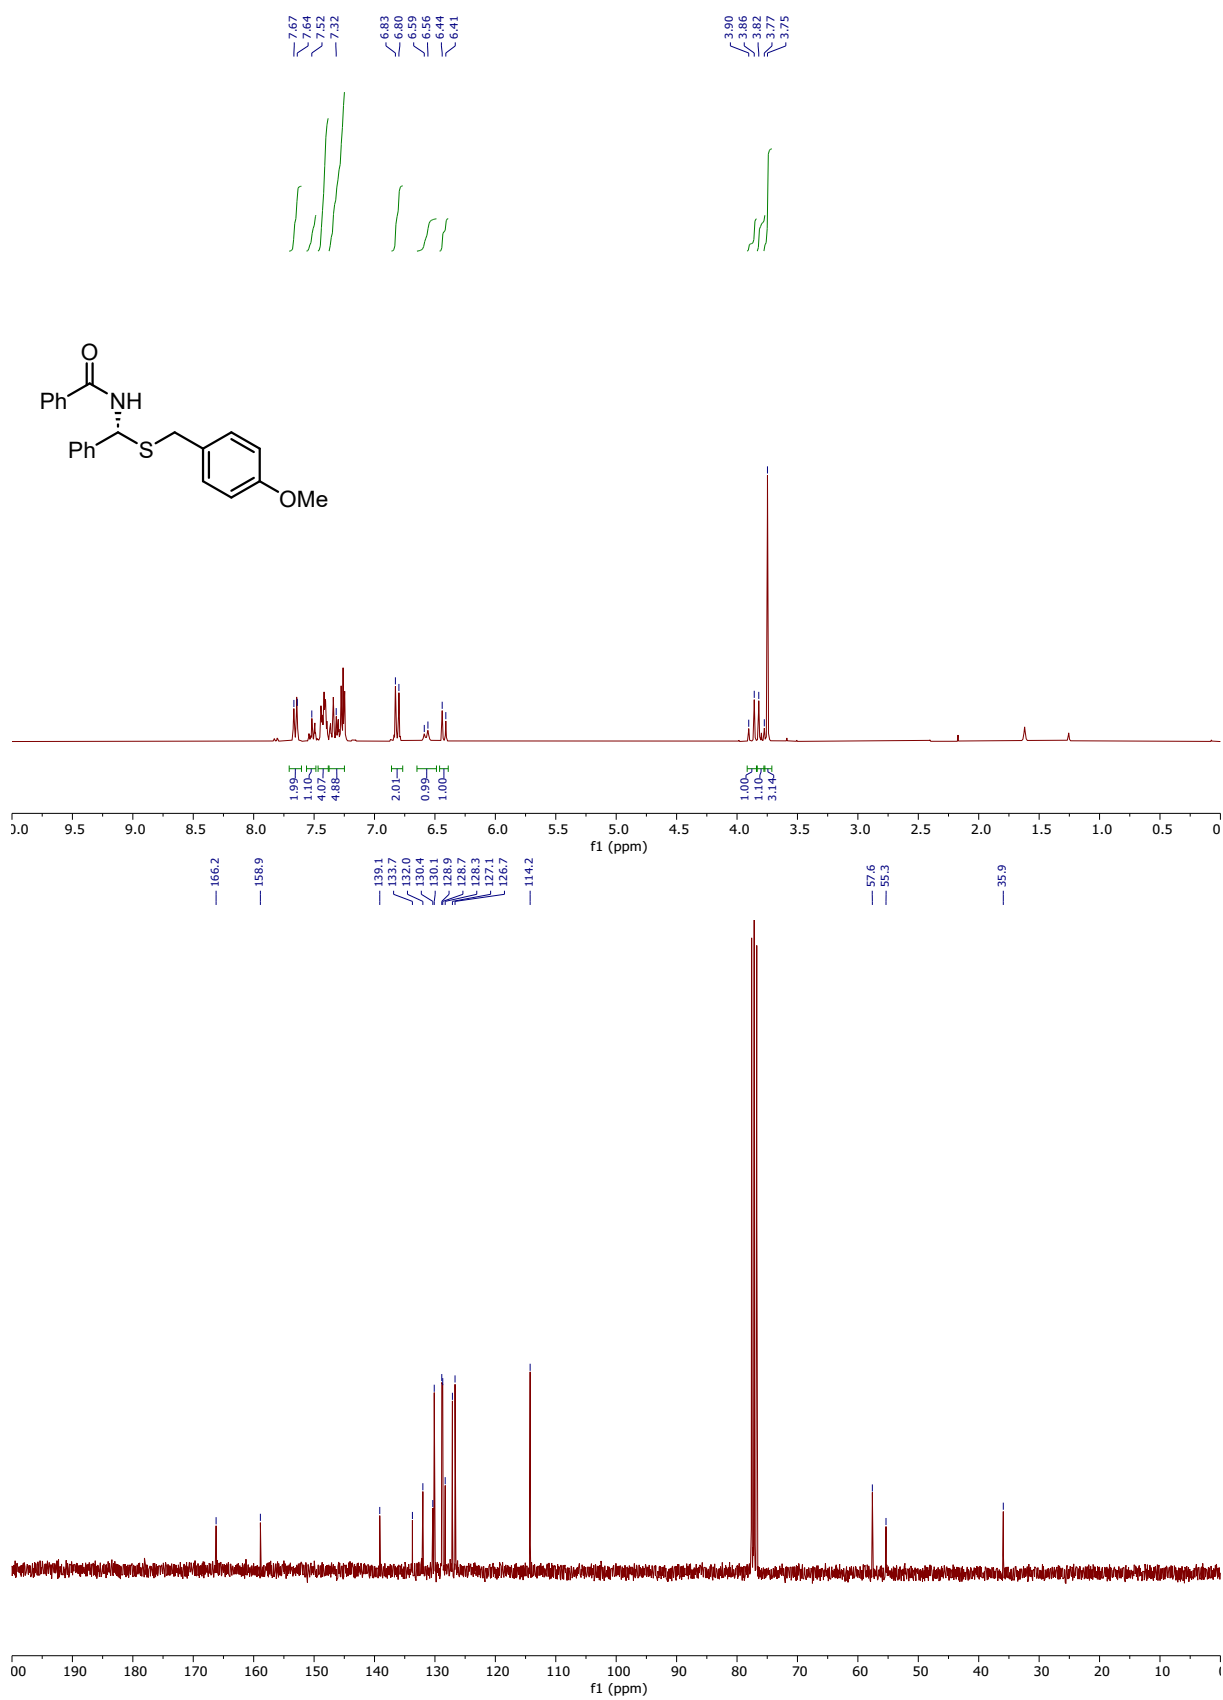

(*R*)-*N*-(((4-fluorobenzyl)thio)(phenyl)methyl)benzamide (3h) (CDCl<sub>3</sub>, <sup>1</sup>H 300 MHz, <sup>13</sup>C 75 MHz, <sup>19</sup>F 282 MHz)

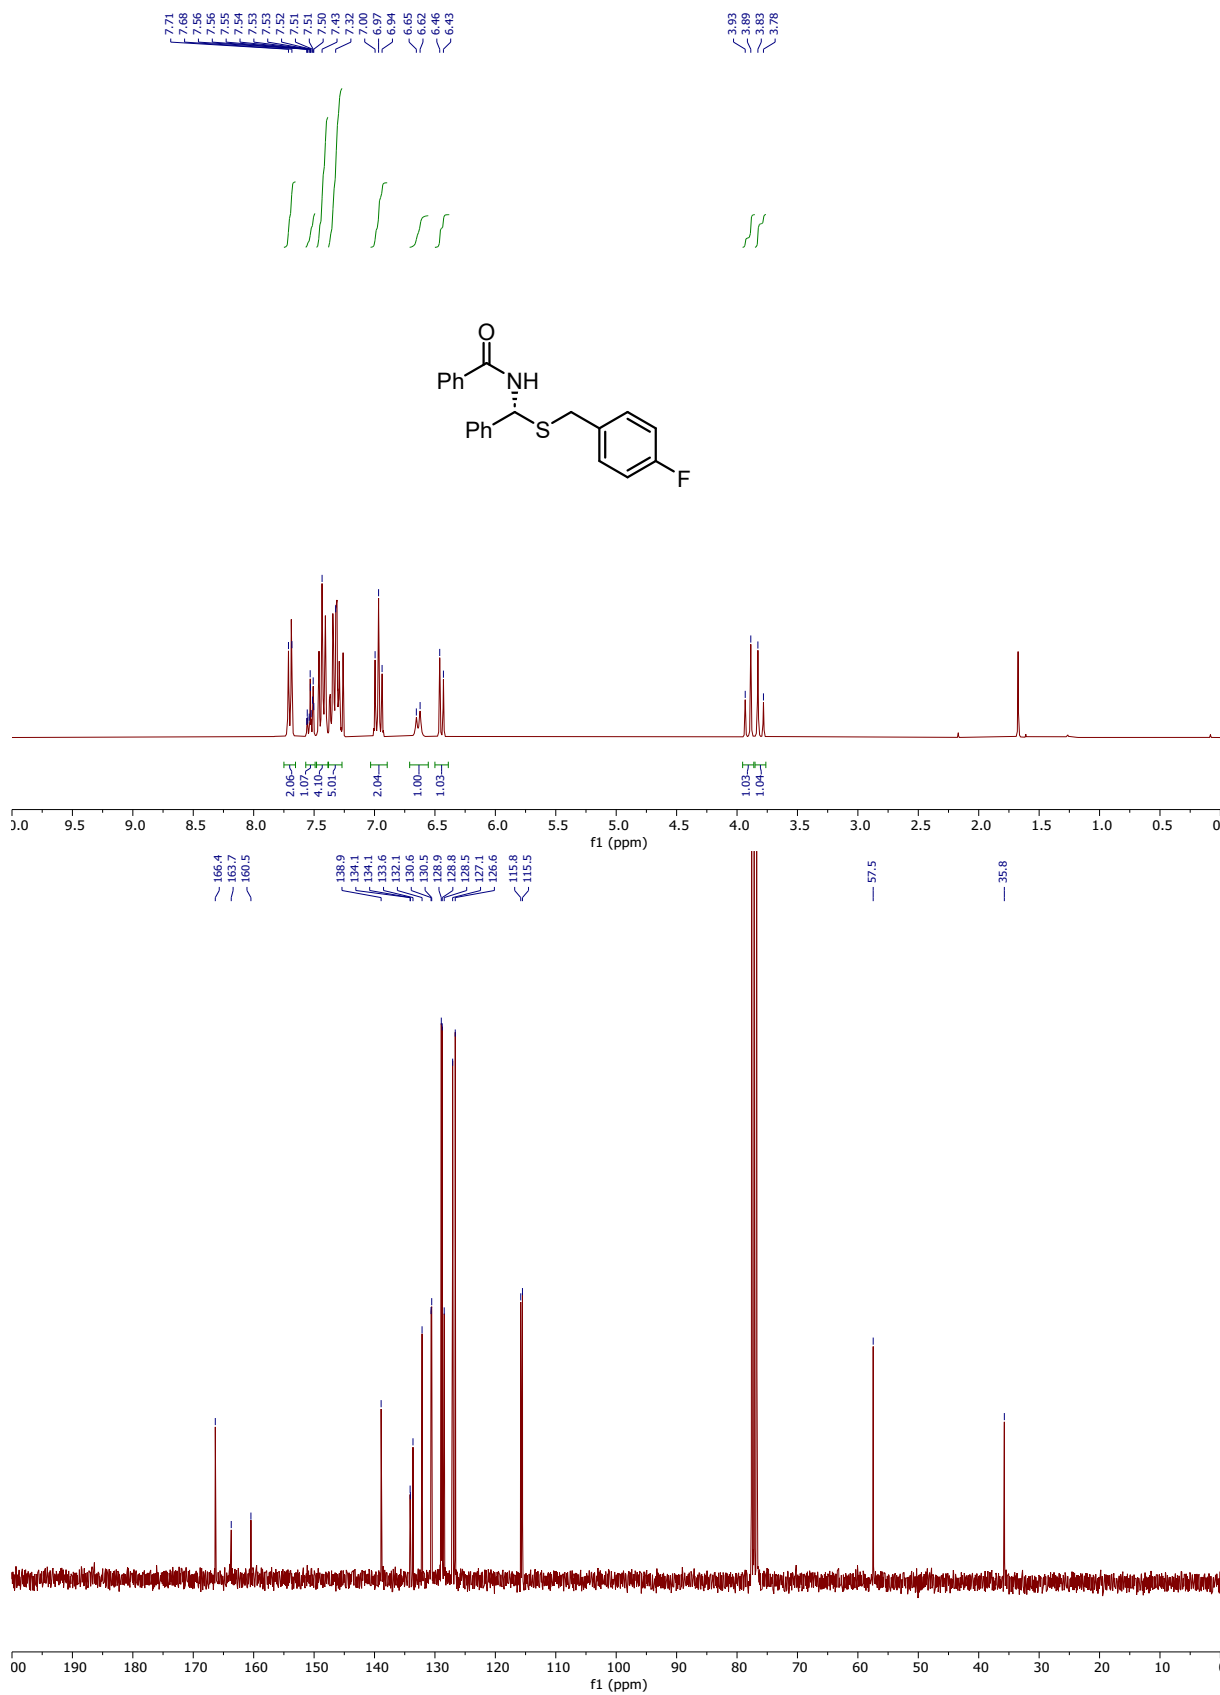

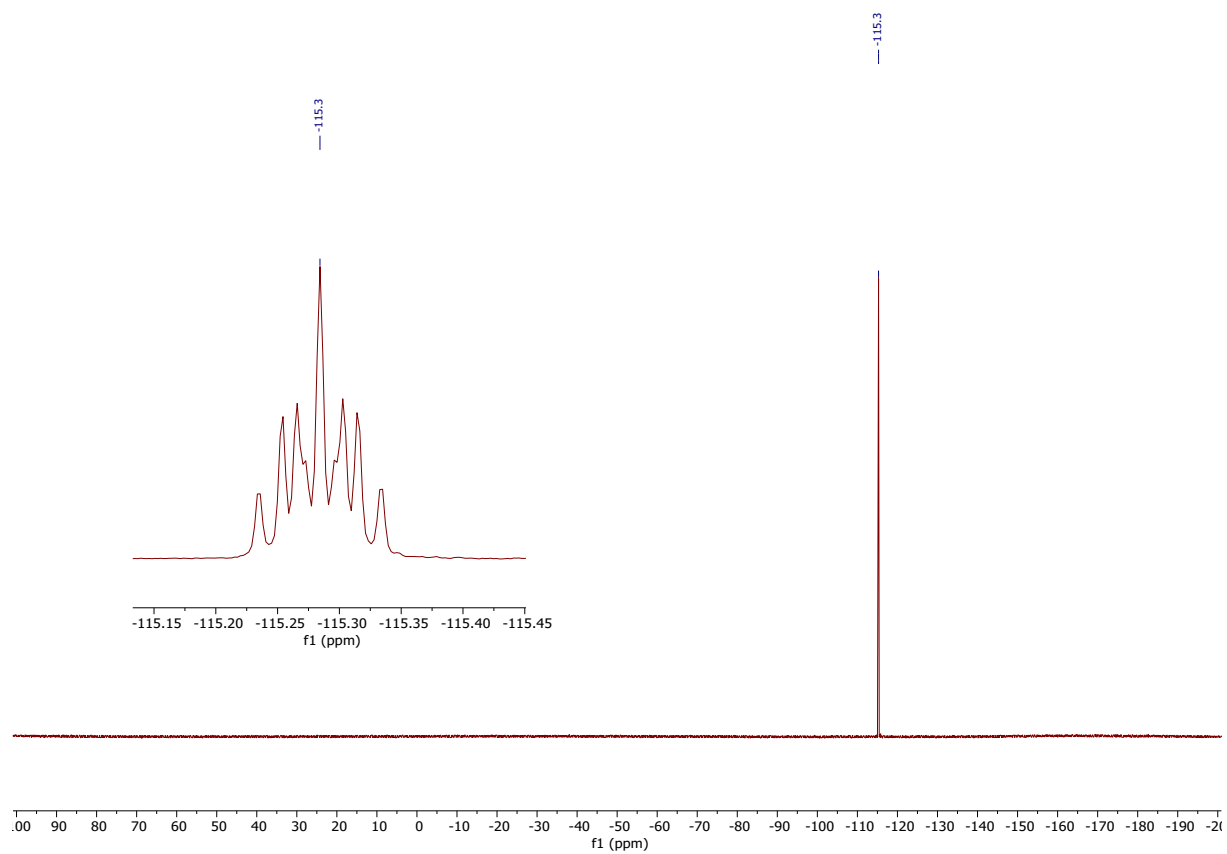

(*R*)-2-((benzamido(phenyl)methyl)thio)acetic acid (3i) (DMSO-d<sub>6</sub>, <sup>1</sup>H 300 MHz, <sup>13</sup>C 75 MHz)

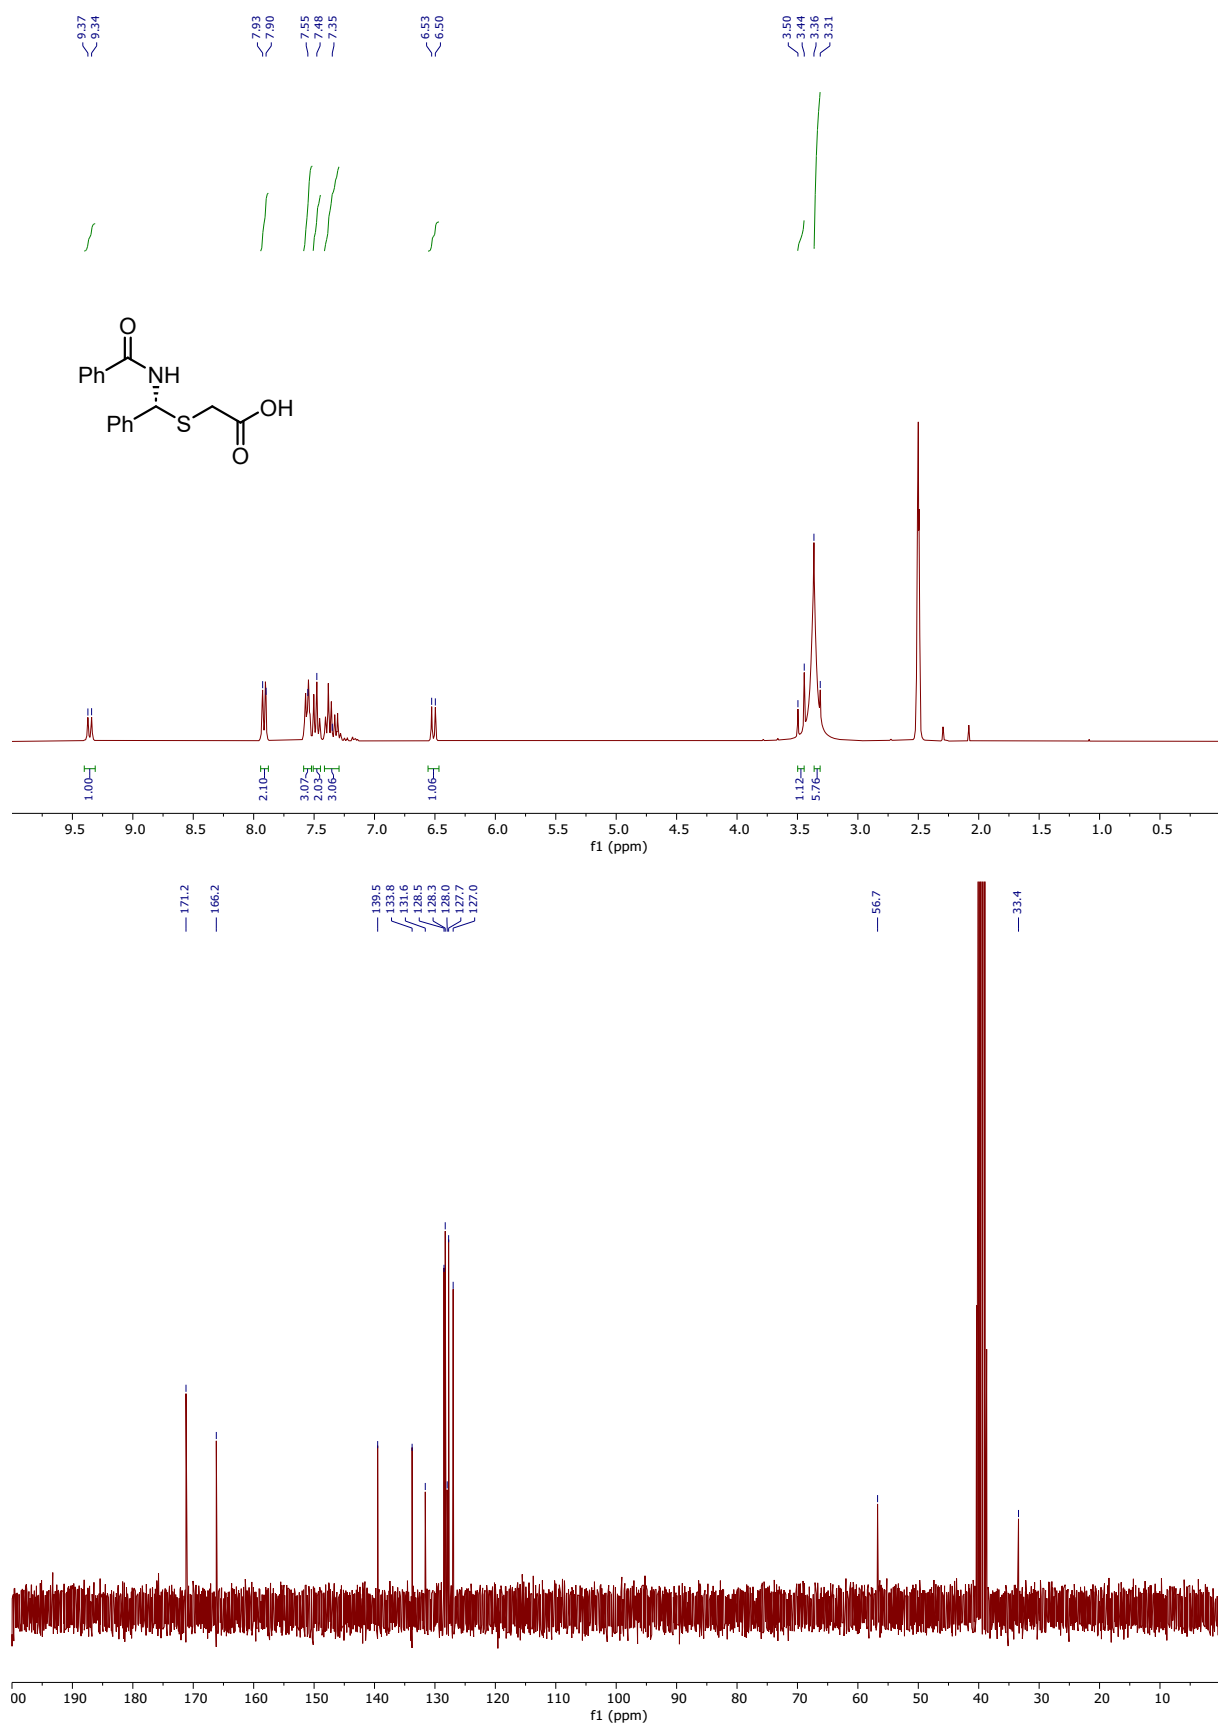

methyl (*R*)-2-((benzamido(phenyl)methyl)thio)acetate (3j) (CDCl<sub>3</sub>, <sup>1</sup>H 300 MHz, <sup>13</sup>C 75 MHz)

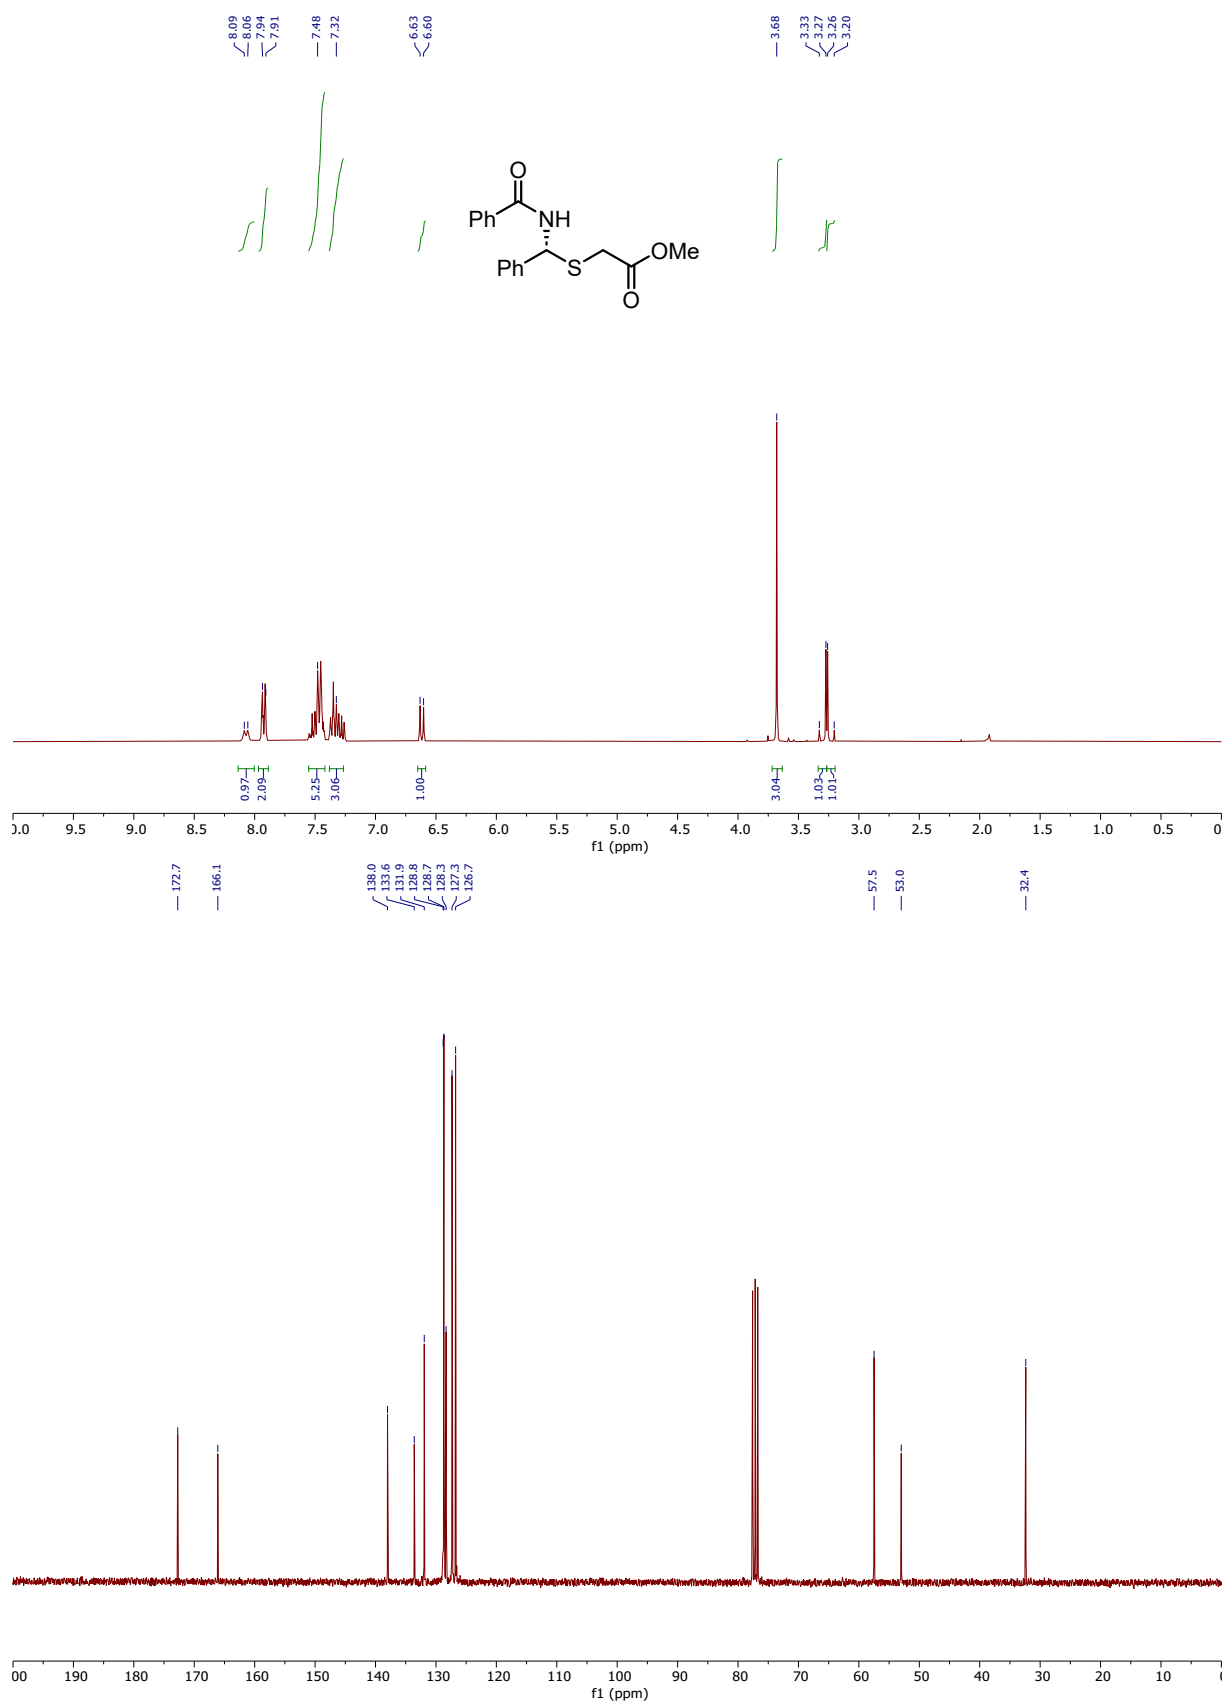

## References

- S1 G. K. Ingle, M. G. Mormino, L. Wojtas and J. C. Antilla, *Org. Lett.*, 2011, **13**, 4822–4825.
- S2 L. Clot-Almenara, C. Rodríguez-Escrich, L. Osorio-Planes and M. A. Pericas, *ACS Catal.*, 2016, **6**, 7647–7651.
- S3 L. Clot-Almenara, C. Rodríguez-Escrich and M. A. Pericàs, *RSC Adv.*, 2018, **8**, 6910–6914.
- S4 T. Nakanishi, J. Kikuchi, A. Kaga, S. Chiba and M. Terada, *Chem. Eur. J.*, 2020, **26**, 8230–8234.
- S5 C. R. McElroy, A. Constantinou, L. C. Jones, L. Summerton and J. H. Clark, *Green Chem.*, 2015, **17**, 3111–3121.
